# Supplementary material for: Calix[4]pyrrolato Stannate(II): A Tetraamido Tin(II) Dianion and Strong Metal‐Centered σ‐Donor
Source: PubMed Central journal article supplement — Angew Chem Int Ed Engl. 2022 Feb 7;61(13):e202116615. doi: 10.1002/anie.202116615 (PMC9306640; doi:10.1002/anie.202116615), 2022-02-07
Supplement: ANIE-61-0-s002.pdf [file ANIE-61-0-s002.pdf]

Supporting Information

**Calix[4]pyrrolato Stannate(II): A Tetraamido Tin(II) Dianion and Strong Metal-Centered  $\sigma$ -Donor**

*H. Ruppert, L. Greb\**

## Supporting Information

### Table of Contents

|          |                                                                                                                                                                                                    |           |
|----------|----------------------------------------------------------------------------------------------------------------------------------------------------------------------------------------------------|-----------|
| <b>1</b> | <b>Experimental Details</b> .....                                                                                                                                                                  | <b>3</b>  |
| <b>2</b> | <b>Computational Details</b> .....                                                                                                                                                                 | <b>5</b>  |
| <b>3</b> | <b>Synthesis</b> .....                                                                                                                                                                             | <b>6</b>  |
| 3.1      | Lithium tin(II) <i>meso</i> -octaethylcalix[4]pyrrolate [Li <sub>2</sub> (thf) <sub>x</sub> ][2] .....                                                                                             | 6         |
| 3.2      | Tetrabutylammonium tin(II) <i>meso</i> -octaethylcalix[4]pyrrolate [(NBu <sub>4</sub> ) <sub>2</sub> ][2] .....                                                                                    | 7         |
| 3.3      | Tetraphenylphosphonium tin(II) <i>meso</i> -octaethylcalix[4]pyrrolate [(PPh <sub>4</sub> ) <sub>2</sub> ( <i>o</i> DFB) <sub>0.5</sub> ][2] .....                                                 | 8         |
| 3.4      | Lithium tin(II) <i>meso</i> -octaethylcalix[4]pyrrolato selenide [Li <sub>2</sub> (thf) <sub>x</sub> ][2-Se] .....                                                                                 | 9         |
| 3.5      | Tetraphenylphosphonium <sup>1</sup> η-(tin(II) <i>meso</i> -octaethylcalix[4]pyrrolate) pentacarbonyl tungsten(0) [(PPh <sub>4</sub> ) <sub>2</sub> ][W( <sup>1</sup> η-2)(CO) <sub>5</sub> ]..... | 10        |
| 3.6      | Tetrabutylammonium <sup>1</sup> η-(tin(II) <i>meso</i> -octaethylcalix[4]pyrrolate) tricarbonyl nickel(0) [(NBu <sub>4</sub> ) <sub>2</sub> ][Ni( <sup>1</sup> η-2)(CO) <sub>3</sub> ] .....       | 11        |
| 3.7      | Ruthenium(II) <sup>5</sup> η-(tin(II) <i>meso</i> -octaethylcalix[4]pyrrolate) <i>para</i> -cymene Ru( <sup>5</sup> η-2)( <i>p</i> -cymene) .....                                                  | 12        |
| 3.8      | Reaction of [Li <sub>2</sub> (thf) <sub>x</sub> ][2] with Electrophiles.....                                                                                                                       | 13        |
| 3.8.1    | Entry 3 (Benzoyl Chloride) .....                                                                                                                                                                   | 13        |
| 3.8.2    | Entry 4 (Benzaldehyde).....                                                                                                                                                                        | 13        |
| 3.8.3    | Entry 5 (4-CF <sub>3</sub> -Benzaldehyde) .....                                                                                                                                                    | 14        |
| 3.9      | Reaction of [(NBu <sub>4</sub> ) <sub>2</sub> ][2] with Electrophiles .....                                                                                                                        | 14        |
| 3.9.1    | Entry 1 (Methylene Chloride) .....                                                                                                                                                                 | 15        |
| 3.9.2    | Entry 2 (Benzyl chloride).....                                                                                                                                                                     | 15        |
| 3.9.3    | Entry 3 (Benzoyl chloride).....                                                                                                                                                                    | 16        |
| 3.9.4    | fEntry 6 (Iodobenzene) .....                                                                                                                                                                       | 16        |
| <b>4</b> | <b>NMR Spectra</b> .....                                                                                                                                                                           | <b>17</b> |
| 4.1      | [Li <sub>2</sub> (thf) <sub>x</sub> ][2] .....                                                                                                                                                     | 17        |
| 4.2      | [(NBu <sub>4</sub> ) <sub>2</sub> ][2] .....                                                                                                                                                       | 20        |
| 4.3      | [(PPh <sub>4</sub> ) <sub>2</sub> ( <i>o</i> DFB) <sub>0.5</sub> ][2].....                                                                                                                         | 21        |
| 4.4      | [Li <sub>2</sub> (thf) <sub>x</sub> ][2-Se].....                                                                                                                                                   | 23        |
| 4.5      | [(PPh <sub>4</sub> ) <sub>2</sub> ][W( <sup>2</sup> η-2)(CO) <sub>5</sub> ] .....                                                                                                                  | 25        |
| 4.6      | [(NBu <sub>4</sub> ) <sub>2</sub> ][Ni( <sup>1</sup> η-2)(CO) <sub>3</sub> ].....                                                                                                                  | 26        |

|           |                                                                                                |           |
|-----------|------------------------------------------------------------------------------------------------|-----------|
| 4.7       | Ru( <sup>5</sup> η-2)(cymene).....                                                             | 28        |
| 4.8       | Reaction of [Li <sub>2</sub> (thf) <sub>x</sub> ][2] with Benzoyl chloride.....                | 29        |
| 4.9       | Reaction of [Li <sub>2</sub> (thf) <sub>x</sub> ][2] with 4-CF <sub>3</sub> -Benzaldehyde..... | 31        |
| 4.10      | Reaction of [(NBu <sub>4</sub> ) <sub>2</sub> ][2] with Methylene Chloride .....               | 32        |
| 4.11      | Reaction of [(NBu <sub>4</sub> ) <sub>2</sub> ][2] with Benzyl Chloride .....                  | 34        |
| 4.12      | Reaction of [(NBu <sub>4</sub> ) <sub>2</sub> ][2] with Benzoyl Chloride .....                 | 35        |
| 4.13      | Reaction of [(NBu <sub>4</sub> ) <sub>2</sub> ][2] with Iodobenzene.....                       | 37        |
| <b>5</b>  | <b>Crystallographic Data.....</b>                                                              | <b>38</b> |
| 5.1       | [Li <sub>2</sub> (thf) <sub>x</sub> ][2] .....                                                 | 38        |
| 5.2       | [(NBu <sub>4</sub> ) <sub>2</sub> ][2] .....                                                   | 39        |
| 5.3       | [(PPh <sub>4</sub> ) <sub>2</sub> (oDFB) <sub>0.5</sub> ][2].....                              | 40        |
| 5.4       | [(PPh <sub>4</sub> ) <sub>2</sub> ][W( <sup>2</sup> η-2)(CO) <sub>5</sub> ] .....              | 41        |
| 5.5       | Ru( <sup>5</sup> η-2)(cymene).....                                                             | 42        |
| 5.6       | [Li(thf) <sub>2</sub> ][3-COPh] .....                                                          | 43        |
| <b>6</b>  | <b>Infrared Spectroscopy.....</b>                                                              | <b>44</b> |
| <b>7</b>  | <b>Comparative TEP Scale.....</b>                                                              | <b>44</b> |
| <b>8</b>  | <b>DFT Calculations .....</b>                                                                  | <b>45</b> |
| <b>9</b>  | <b>Cyclic Voltammetry .....</b>                                                                | <b>48</b> |
| <b>10</b> | <b>ETS-NOCV Results.....</b>                                                                   | <b>48</b> |
| <b>11</b> | <b>NBO Results .....</b>                                                                       | <b>51</b> |
| <b>12</b> | <b><sup>77</sup>Se and <sup>119</sup>Sn NMR Shift Calculation Results .....</b>                | <b>53</b> |
| <b>13</b> | <b>Optimized Molecular Geometries .....</b>                                                    | <b>53</b> |
| <b>14</b> | <b>Literature .....</b>                                                                        | <b>81</b> |

## 1 Experimental Details

All manipulations were carried out under a dry argon atmosphere by using standard Schlenk techniques to prevent oxidation and hydrolysis of the sensitive compounds. *meso*-Octamethylcalix[4]pyrrole as well as the deprotonated *tris*-(thf) *tetra*-lithium *meso*-octamethylcalix[4]pyrrolate have been synthesized by literature known procedures.<sup>[1]</sup> The commercially available chemicals were used as received. All solvents and liquid chemicals were rigorously dried by applying standard procedures, freshly degassed and stored over activated molecular sieve (3 Å resp. 4 Å) prior to use. All glassware, syringes, magnetic stirring bars, and needles were thoroughly dried. All air sensitive compounds were stored in a glove box (MBraun LABmaster dp, MB-20-G, SylaTech Y05G) under N<sub>2</sub> atmosphere. Analytical data of literature known compounds were compared to data of the respective reference and were found to be consistent in all cases. Purity and identity of novel compounds were confirmed by high resolution multinuclear NMR-spectroscopy, mass spectrometry, elemental analysis and if possible, X-ray diffraction analysis.

<sup>1</sup>H, <sup>13</sup>C, <sup>19</sup>F, <sup>31</sup>P, <sup>77</sup>Se and <sup>119</sup>Sn NMR spectra were collected with a Bruker (DPX) 200, a Bruker Advance II 400 or a Bruker 2 Advance III 600 NMR spectrometer and referenced to tetramethylsilane (<sup>1</sup>H, <sup>13</sup>C), tetramethylstannane (<sup>119</sup>Sn), or dimethyl selenide (<sup>77</sup>Se). Chemical shifts are reported as dimensionless  $\delta$  values in ppm, coupling constants J are given in hertz (Hz).

High-resolution electrospray ionization mass spectra (HRMS-ESI) were obtained with a Bruker ApexQe FT-ICR instrument.

Fourier-transform infrared (FTIR) spectra at 298 K were obtained with an Agilent Cary 630 FTIR spectrometer, which was operated with the MicroLab PC software, and processed with BioRad Merlin and OriginPro 2020 64Bit.

Cyclic voltammetry was done inside a dry nitrogen-filled glove box at room temperature with a EmStat3+blue device from PalmSens, which was operated with the PSTrace 5.7 software. A glassy carbon electrode (working area of 0.07 cm<sup>2</sup>) was used as a working electrode, a platinum wire as a counter electrode, and a silver wire as a quasi-reference electrode. The scan rate was set to 0.05 V s<sup>-1</sup>. As solvent, 1,2-difluorobenzene (*o*DFB), as supporting electrolyte, [NnBu<sub>4</sub>][PF<sub>6</sub>] was used. The analyte concentration was approximately  $c = 10^{-3}$  mol L<sup>-1</sup>, the supporting electrolyte concentration  $c_{\text{supp}} = 0.1$  mol L<sup>-1</sup>. The acquired data was externally referenced against the decamethyl-ferrocene/decamethylferrocenium (dmfc/dmfc<sup>+</sup>) redox couple and then transferred to the Ag/AgCl/KCl reference. Under the same conditions as described fc/fc<sup>+</sup> has a redox potential of 532 mV and dmfc/dmfc<sup>+</sup> a redox potential of 30 mV against the Ag/AgCl/KCl redox couple.<sup>[2]</sup> The dmfc/dmfc<sup>+</sup> reference measurement was carried out under the same conditions as described.

Elemental analysis for the determination of the C-,H- and N-content was carried out by the microanalysis laboratory of the Institute of Inorganic Chemistry at Heidelberg University using a vario MICRO cube of Elementar Analysensysteme.

Suitable crystals of the compounds were taken directly out of the mother liquor, immersed in perfluorinated polyether oil, and fixed on top of a cryo loop. Measurements were made on Bruker D8 Venture CCD diffractometer with a low-temperature unit using (100 K) Mo-K $\alpha$  radiation chromated by mirror optics. The data collected were processed using standard Bruker APEX3 software. Structures were solved by intrinsic phasing using the SHELXT program<sup>[3]</sup> and refined with the SHELXL.<sup>[4]</sup> Graphical handling

of the structural data during solution and refinement was performed with shelXLe.<sup>[5]</sup> Atomic coordinates and anisotropic thermal parameters of non-hydrogen atoms were refined by full-matrix least-squares calculations<sup>[6]</sup> and displacement ellipsoids are displayed with 50 % probability. Hydrogen atoms were included using a riding model. Crystallographic data for the structures reported in this article are deposited within the Cambridge Crystallographic Data Centre as supplementary publication no. 2125915-2125920 and can be obtained free of charge. Crystal data and structure are summarized in the tables under the crystallographic figures.

## 2 Computational Details

All computations employing the Orca 4.2.1<sup>[7]</sup> software or the Amsterdam Modelling Suite AMS2021.102<sup>[8]</sup> were carried out with the computational resources available on the bwFor Cluster JUSTUS2 located at Ulm University within the Baden Württemberg High Performance Computing program.

All structures were optimized with the Orca 4.2.1 software at the B97M-D3(BJ)<sup>[9]</sup>/def2-TZVPP<sup>[10]</sup> level of theory. Minima structures were obtained with the following ORCA input line:

```
! RKS B97M-D3BJ def2-TZVPP Grid5 NoFinalGrid Opt NumFreq TightSCF
```

All calculated geometries have been confirmed as energetic minima on the potential energy surface by numerical calculation of harmonic frequencies at the B97M-D3(BJ)/def2-TZVPP level, revealing only positive values.

Subsequent single point calculations employing the Conductor-like Polarizable Continuum Model (C-PCM)<sup>[11]</sup> were performed with the following ORCA input line:

```
! RKS B97M-D3BJ def2-TZVPP CPCM(THF) Grid5 NoFinalGrid SP NumFreq  
TightSCF
```

Natural Bond Orbital (NBO) calculations were conducted on the PBE0<sup>[12]</sup>/def2-TZVPP<sup>[10]</sup> level of theory including a C-PCM solvation model using NBO6.0.18a<sup>[13]</sup> as included in Orca 4.2.1 *via* the following ORCA input line:

```
! RKS PBE0 def2-TZVPP CPCM(THF) NBO TightSCF Grid5 NoFinalGrid
```

Calculations employing the Extended Transition State (ETS) method for energy decomposition analysis (EDA)<sup>[14]</sup> combined with the natural orbitals for chemical valence (NOCV)<sup>[15]</sup> calculations were performed on the BP86-G3<sup>[16]</sup> /TZ2P level of theory as implemented in the AMS2021.201 software.

Computational <sup>77</sup>Se and <sup>119</sup>Sn NMR absolute chemical shieldings ( $\sigma$ ) were calculated with AMS2021.201 software at the PBE0<sup>[12]</sup>/TZ2P level of theory, chemical shifts were obtained by referencing to the computed value of SeMe<sub>2</sub> and SnMe<sub>4</sub> respectively. NMR chemical shift computations were carried out without the frozen core approximation and with the scalar relativistic spin-orbit ZORA approximation<sup>[17]</sup> to address correct treatment of heavy elements.

Isosurface plots were created using the IboView software v20150427.

### 3 Synthesis

#### 3.1 Lithium tin(II) meso-octaethylcalix[4]pyrrolate [ $\text{Li}_2(\text{thf})_x$ ][2]

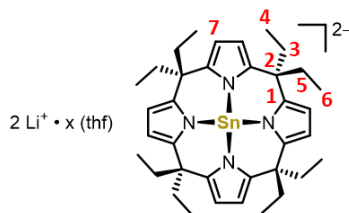

In a 200 mL Schlenk tube, *tris*-(thf) *tetra*-lithium meso-octamethylcalix[4]pyrrolate [ $\text{Li}_4(\text{thf})_3$ ][1] (1.0 eq, 2.82 mmol, 2.2 g) was dissolved in 55 mL THF. While stirring at room temperature tin(II) chloride (1.0 eq, 2.82 mmol, 545 mg) was added in portions. After turning slightly yellow for 5 minutes the clear, colorless solution was stirred at room temperature for 30 minutes before the solvent was evaporated at reduced pressure. The obtained crude was extracted with 200 mL  $\text{Et}_2\text{O}$  and the extract filtered over a low porosity frit to remove surplus lithium chloride. After evaporation of  $\text{Et}_2\text{O}$  the obtained crude was redissolved in 20 mL THF and the product precipitated by adding of 85 mL pentane. Isolation of the precipitant by filtration over a low porosity frit and drying at reduced pressure yielded [ $\text{Li}_2(\text{thf})_x$ ][2] as a colorless solid (2.237 g, 2.26 mmol ( $x=4.2$ ), 80% yield). Cooling of a concentrated toluene solution of [ $\text{Li}_2(\text{thf})_x$ ][2] to  $-30^\circ\text{C}$  yielded single crystals suitable for X-ray diffraction.

$^1\text{H NMR}$  [ $^1\text{H}$ ,  $^1\text{H}$ ,  $^1\text{H}$ -COSY] (600.13 MHz,  $\text{THF-}d_8$ , 295 K):  $\delta$  [ppm] = 5.85 (s,  $^{117}\text{Sn}$ -satelites  $^4J_{\text{Sn,H}} = 156.41$  Hz,  $^{119}\text{Sn}$ -satelites  $^4J_{\text{Sn,H}} = 162.29$  Hz,  $H_7$ , 8H), 3.62 (m,  $H_{\text{thf}}$ , 16.8H), 1.88 (q,  $^3J_{\text{H,H}} = 7.3$  Hz,  $H_3$ , 8H), 1.78 (m,  $H_{\text{thf}}$ , 16.8H), 1.76 (q,  $^3J_{\text{H,H}} = 7.3$  Hz,  $H_5$ , 8H, overlapped with thf), 0.79 (t,  $^3J_{\text{H,H}} = 7.3$  Hz,  $H_4$ , 12H), 0.50 (t,  $^3J_{\text{H,H}} = 7.3$  Hz,  $H_6$ , 12H).

$^1\text{H NMR}$  [ $^1\text{H}$ ,  $^1\text{H}$ ,  $^1\text{H}$ -COSY] (600.13 MHz,  $\text{C}_6\text{D}_6$ , 295 K):  $\delta$  [ppm] = 6.44 (s,  $H_7$ , 8H), 3.38 (m,  $H_{\text{thf}}$ , 16.8H), 2.22 (q,  $^3J_{\text{H,H}} = 7.3$  Hz,  $H_3$ , 8H), 2.13 (q,  $^3J_{\text{H,H}} = 7.3$  Hz,  $H_3$ , 6H), 2.01 (q,  $^3J_{\text{H,H}} = 7.3$  Hz,  $H_3$ , 2H), 1.27 (m,  $H_{\text{thf}}$ , 16.8H), 1.08 (t,  $^3J_{\text{H,H}} = 7.3$  Hz,  $H_4$ , 8H), 0.90 (t,  $^3J_{\text{H,H}} = 7.3$  Hz,  $H_6$ , 16H).

$^7\text{Li NMR}$  (233.25 MHz,  $\text{THF-}d_8$ , 295 K):  $\delta$  [ppm] =  $-2.12$  (s).

$^7\text{Li NMR}$  (233.25 MHz,  $\text{C}_6\text{D}_6$ , 295 K):  $\delta$  [ppm] =  $-1.40$  (s, broad),  $-3.01$  (s),  $-4.30$  (s, broad).

$^{13}\text{C NMR}$  [ $^{13}\text{C}\{^1\text{H}\}$ ,  $^{13}\text{C}$ -DEPT135,  $^1\text{H}$ ,  $^{13}\text{C}$ -HSQC,  $^1\text{H}$ ,  $^{13}\text{C}$ -HMBC] (150.92 MHz,  $\text{THF-}d_8$ , 295 K):  $\delta$  [ppm] = 144.05 (s,  $\text{C}_1$ ), 106.56 (s,  $\text{C}_7\text{H}$ ), 68.02 (s,  $\text{C}_{\text{thfH}_2}$ ), 46.33 (s,  $\text{C}_2$ ), 45.94 (s,  $\text{C}_2$ ), 39.47 (s,  $^{117/119}\text{Sn}$ -satelites  $^4J_{\text{Sn,C}} = 16$  Hz,  $\text{C}_5\text{H}_2$ ), 33.69 (s,  $\text{C}_3\text{H}_2$ ), 26.15 (s,  $\text{C}_{\text{thfH}_2}$ ), 10.47 (s,  $\text{C}_4\text{H}_3$ ), 10.22 (s,  $\text{C}_6\text{H}_3$ ).

$^{13}\text{C NMR}$  [ $^{13}\text{C}\{^{18}\text{O}\}$ ,  $^{13}\text{C}$ -DEPT135,  $^1\text{H}$ ,  $^{13}\text{C}$ -HSQC,  $^1\text{H}$ ,  $^{13}\text{C}$ -HMBC] (150.92 MHz,  $\text{C}_6\text{D}_6$ , 295 K):  $\delta$  [ppm] = 143.92 (s,  $\text{C}_1$ ), 105.14 (s,  $\text{C}_7\text{H}$ ), 67.79 (s,  $\text{C}_{\text{thfH}_2}$ ), 46.63 (s,  $\text{C}_2$ ), 37.86 (s,  $\text{C}_5\text{H}_2$ ), 36.50 (s,  $\text{C}_5\text{H}_2$ ), 32.72 (s,  $\text{C}_3\text{H}_2$ ), 25.06 (s,  $\text{C}_{\text{thfH}_2}$ ), 9.99 (s,  $\text{C}_4\text{H}_3$ ), 9.76 (s,  $\text{C}_6\text{H}_3$ ), 9.69 (s,  $\text{C}_6\text{H}_3$ ).

$^{119}\text{Sn NMR}$  [ $^{119}\text{Sn}$ ,  $^1\text{H}$ -HMBC] (223.81 MHz,  $\text{THF-}d_8$ , 295 K):  $\delta$  [ppm] =  $-481.32$ .

$^{119}\text{Sn NMR}$  [ $^{119}\text{Sn}$ ,  $^1\text{H}$ -HMBC] (223.81 MHz,  $\text{C}_6\text{D}_6$ , 295 K):  $\delta$  [ppm] =  $-618.90$ .

**HR-MS** (ESI, negative, THF): calcd. for  $[\text{C}_{32}\text{H}_{48}\text{Li}_2\text{N}_4\text{Sn}+\text{Cl}]^-$  ( $\text{Cl}^-$  from ESI atmosphere)  $m/z = 705.2918$ , found  $m/z = 705.2929$ .

**EA:** Due to loss of THF upon isolation, a correct elemental analysis could not be obtained.

### 3.2 Tetrabutylammonium tin(II) *meso*-octaethylcalix[4]pyrrolate $[(\text{NBu}_4)_2][\mathbf{2}]$

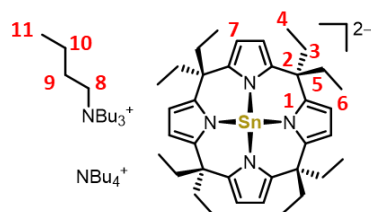

In a 50 mL Schlenk tube,  $[\text{Li}_2(\text{thf})_x][\mathbf{2}]$  (1.0 eq,  $x = 4.2$ , 522  $\mu\text{mol}$ , 500 mg) and tetrabutylammonium chloride (2.0 eq, 1.044 mmol, 296 mg) were dissolved in 30 mL 1,2-difluorobenzene (*o*DFB) and stirred at room temperature for 2 hours. The colorless suspension was filtered over a PTFE syringe filter (pore size 0.22  $\mu\text{m}$ ) and the filtrate evaporated at reduced pressure to obtain  $[(\text{NBu}_4)_2][\mathbf{2}]$  as a colorless solid (550 mg, 482  $\mu\text{mol}$ , 92% yield). Gas phase diffusion of pentane into a concentrated solution of  $[(\text{NBu}_4)_2][\mathbf{2}]$  in *o*DFB at  $-30^\circ\text{C}$  yielded single crystals suitable for X-ray diffraction.

$^1\text{H NMR}$  [ $^1\text{H}$ ,  $^1\text{H}$ ,  $^1\text{H}$ -COSY] (600.18 MHz, THF-*d*<sub>8</sub>, 295 K):  $\delta$  [ppm] = 5.68 (s,  $^{119}\text{Sn}$ -satellites  $^4J_{\text{Sn,H}} = 12$  Hz,  $H_7$ , 8H), 2.60 – 2.89 (*m*,  $H_8$ , 16), 2.08 (*q*,  $^3J_{\text{H,H}} = 8.0$  Hz,  $H_3$ , 8H), 1.95 (*q*,  $^3J_{\text{H,H}} = 9.0$  Hz,  $H_5$ , 8H), 1.34 (*m*,  $H_9$ , 16H), 1.24 (*q*,  $^3J_{\text{H,H}} = 4.0$  Hz,  $H_{10}$ , 16H), 1.18 (*t*,  $^3J_{\text{H,H}} = 7.3$  Hz,  $H_4$ , 12H), 0.89 (*t*,  $^3J_{\text{H,H}} = 9.0$  Hz,  $H_{11}$ , 24H), 0.39 (*t*,  $^3J_{\text{H,H}} = 6.0$  Hz,  $H_6$ , 12H).

$^{13}\text{C NMR}$  [ $^{13}\text{C}\{^1\text{H}\}$ ,  $^{13}\text{C}$ -DEPT135,  $^1\text{H}$ ,  $^{13}\text{C}$ -HSQC,  $^1\text{H}$ ,  $^{13}\text{C}$ -HMBC] (150.92 MHz, THF-*d*<sub>8</sub>, 295 K):  $\delta$  [ppm] = 144.05 (s,  $C_1$ ), 101.96 (s,  $C_7\text{H}$ ), 59.15 (s,  $C_8\text{H}_2$ ), 46.37 (s,  $C_2$ ), 41.36 (s,  $C_5\text{H}_2$ ), 29.40 (s,  $C_3\text{H}_2$ ), 25.02 (s,  $C_9\text{H}_2$ ), 21.00 (s,  $C_{10}\text{H}_2$ ), 14.41 (s,  $C_{11}\text{H}_3$ ), 12.02 (s,  $C_4\text{H}_3$ ), 10.25 (s,  $C_6\text{H}_3$ ).

$^{119}\text{Sn NMR}$  [ $^{119}\text{Sn}$ ,  $^1\text{H}$ -HMBC] (223.81 MHz, THF-*d*<sub>8</sub>, 295 K):  $\delta$  [ppm] =  $-517.83$  (s).

**EA:** calcd. for  $\text{C}_{68}\text{H}_{120}\text{N}_6\text{Sn}$ : C, 71.62; H, 10.61; N, 7.37. Found: C, 71.41; H, 10.91; N, 7.69.



### 3.3 Tetraphenylphosphonium tin(II) *meso*-octaethylcalix[4]pyrrolate $[(\text{PPh}_4)_2(\text{oDFB})_{0.5}][2]$

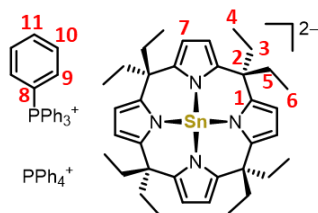

In a 50 mL Schlenk tube,  $[\text{Li}_2(\text{thf})_x][2]$  ( $x = 4.2$ , 1.0 eq, 514  $\mu\text{mol}$ , 500 mg) was dissolved in 15 mL *o*DFB and tetraphenylphosphonium chloride (2.0 eq, 1.028 mmol, 386 mg) was added while stirring at room temperature. The clear colorless solution immediately turned orange and a colorless solid precipitated. After stirring for 30 minutes precipitation of an orange solid occurred which could be redissolved by adding 6 mL acetonitrile. Filtration of the reaction mixture over a PTFE syringe filter (pore size 0.22  $\mu\text{m}$ ) to remove the lithium chloride formed during the reaction yielded an orange clear solution. To remove residue lithium chloride, the solvent was evaporated at reduced pressure and the remaining was redissolved in 9 mL *o*DFB/MeCN (2:1) and kept at  $-30^\circ\text{C}$  over night. Filtration over a PTFE syringe filter and subsequent addition of three times the volume of pentane at  $-30^\circ\text{C}$  caused the slow precipitation of  $[(\text{PPh}_4)_2(\text{oDFB})_{0.5}][2]$  as a dark red solid (372 mg, 267  $\mu\text{mol}$ , 52% yield). Gas phase diffusion of pentane into a concentrated solution of  $[(\text{PPh}_4)_2(\text{oDFB})_{0.5}][2]$  in *o*DFB and  $\text{CH}_3\text{CN}$  at  $-30^\circ\text{C}$  yielded single crystals suitable for X-ray diffraction.

$^1\text{H NMR}$  [ $^1\text{H}$ ,  $^1\text{H}$ ,  $^1\text{H}$ -COSY] (399.89 MHz,  $\text{THF-}d_8/\text{CD}_3\text{CN}$ , 295 K):  $\delta$  [ppm] = 7.78 (*m*,  $H_{11}$ , 8H), 7.58 – 7.68 (*m*,  $H_{9,10}$ , 32H), 7.20 – 7.30 (*m*,  $H_{\text{oDFB}}$ , 1H), 7.10 – 7.17 (*m*,  $H_{\text{oDFB}}$ , 1H), 5.66 (*s*,  $H_7$ , 8H), 1.79 – 1.94 (*m*,  $H_{3,5}$ , overlaid with  $\text{CD}_3\text{CN}$ , 16H), 0.72 (*t*,  $^3J_{\text{H,H}} = 9.0$  Hz,  $H_4$ , 12H), 0.58 (*t*,  $^3J_{\text{H,H}} = 9.0$  Hz,  $H_6$ , 12H).

$^{13}\text{C NMR}$  [ $^{13}\text{C}\{^1\text{H}\}$ ,  $^{13}\text{C}$ -DEPT135,  $^1\text{H}$ ,  $^{13}\text{C}$ -HSQC,  $^1\text{H}$ ,  $^{13}\text{C}$ -HMBC] (100.55 MHz,  $\text{THF-}d_8/\text{CD}_3\text{CN}$ , 295 K):  $\delta$  [ppm] = 143.45 (*s*,  $C_1$ ), 137.20 (*d*,  $^4J_{\text{P,C}} = 3.0$  Hz,  $\text{CH}_{11}$ ), 136.00 (*d*,  $^2J_{\text{P,C}} = 10.4$  Hz,  $\text{CH}_9$ ), 131.93 (*d*,  $^3J_{\text{P,C}} = 13.07$  Hz,  $\text{CH}_{10}$ ), 119.18 (*d*,  $^1J_{\text{P,C}} = 89.49$  Hz,  $C_8$ ), 102.92 (*s*,  $C_7\text{H}$ ), 47.06 (*s*,  $C_2$ ), 39.69 (*s*,  $\text{C}_5\text{H}_2$ ), 35.75 (*s*,  $\text{C}_3\text{H}_2$ ), 11.99 (*s*,  $\text{C}_4\text{H}_3$ ), 11.46 (*s*,  $\text{C}_6\text{H}_3$ ).

$^{19}\text{F NMR}$  (376.27 MHz,  $\text{THF-}d_8/\text{CD}_3\text{CN}$ , 295 K):  $\delta$  [ppm] =  $-140.36$  -  $-140.29$  (*m*, *o*DFB).

$^{31}\text{P}\{^1\text{H}\}$  NMR (161.88 MHz,  $\text{THF-}d_8/\text{CD}_3\text{CN}$ , 295 K):  $\delta$  [ppm] = 22.82 (*s*,  $\text{PPh}_4^+$ ).

$^{119}\text{Sn NMR}$  [ $^{119}\text{Sn}$ ,  $^1\text{H}$ -HMBC] (223.81 MHz,  $\text{THF-}d_8/\text{CD}_3\text{CN}$ , 295 K):  $\delta$  [ppm] =  $-485.98$ .

EA: calcd. for  $\text{C}_{87}\text{H}_{90}\text{FN}_4\text{P}_2\text{Sn}$ : C, 75.10; H, 6.52; N, 4.03. Found: C, 75.09; H, 6.57; N, 4.25.

### 3.4 Lithium tin(II) *meso*-octaethylcalix[4]pyrrolato selenide [Li<sub>2</sub>(thf)<sub>x</sub>][2-Se]

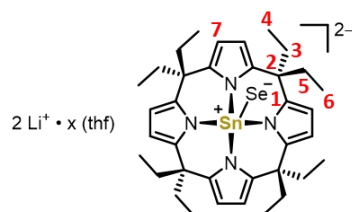

0.5 mL THF-*d*<sub>8</sub> were added to [Li<sub>2</sub>(thf)<sub>x</sub>][2] (*x* = 4.2, 1.0 eq, 20.56 μmol, 20 mg) and selenium powder (3.0 eq, 61.67 μmol, 4.9 mg) in a Young NMR tube and mixed at room temperature for 30 minutes. The dark red reaction solution was filtered over a PTFE syringe filter (pore size 0.22 μm) to remove surplus selenium and the selenium adduct was characterized *via* NMR spectroscopy and HR-MS ESI(-) measurements. No yield was determined.

<sup>1</sup>H NMR [<sup>1</sup>H, <sup>1</sup>H,<sup>1</sup>H-COSY] (399.89 MHz, THF-*d*<sub>8</sub>/CD<sub>3</sub>CN, 295 K): δ [ppm] = 5.88 (*s*, *H*<sub>7</sub>, 8H), 3.69 – 3.59 (*m*, thf, 13H), 2.13 (*q*, <sup>3</sup>*J*<sub>H,H</sub> = 7.3 Hz, *H*<sub>5</sub>, 6H), 2.02 – 1.91 (*m*, *H*<sub>5</sub>, 2H), 1.85 (*q*, <sup>3</sup>*J*<sub>H,H</sub> = 7.1 Hz, *H*<sub>3</sub>, 8H), 1.81 – 1.74 (*m*, thf, 13H), 0.69 (*t*, <sup>3</sup>*J*<sub>H,H</sub> = 7.4 Hz, *H*<sub>6</sub>, 12H), 0.62 (*t*, <sup>3</sup>*J*<sub>H,H</sub> = 7.1 Hz, *H*<sub>4</sub>, 12H).

<sup>13</sup>C NMR [<sup>13</sup>C{<sup>1</sup>H}, <sup>13</sup>C-DEPT135, <sup>1</sup>H,<sup>13</sup>C-HSQC, <sup>1</sup>H,<sup>13</sup>C-HMBC] (100.55 MHz, THF-*d*<sub>8</sub>, 295 K): δ [ppm] = 143.64 (*s*, *C*<sub>1</sub>), 104.13 (*s*, *C*<sub>7</sub>H), 67.39 (*s*, thf), 45.43 (*s*, *C*<sub>2</sub>), 38.13 (*s*, *C*<sub>5</sub>H<sub>2</sub>), 36.01 (*s*, *C*<sub>3</sub>H<sub>2</sub>), 25.53 (*s*, thf), 9.74 (*s*, *C*<sub>4</sub>H<sub>3</sub>), 9.65 (*s*, *C*<sub>6</sub>H<sub>3</sub>).

<sup>7</sup>Li NMR (155.41 MHz, THF-*d*<sub>8</sub>/CD<sub>3</sub>CN, 295 K): δ [ppm] = -0.29 (*s*).

<sup>77</sup>Se NMR [<sup>77</sup>Se{<sup>1</sup>H}, <sup>1</sup>H,<sup>77</sup>Se-HMBC] (114.46 MHz, THF-*d*<sub>8</sub>, 295 K): δ [ppm] = -391.99 (*s*).

<sup>119</sup>Sn NMR [<sup>119</sup>Sn,<sup>1</sup>H-HMBC] (149.12 MHz, THF-*d*<sub>8</sub>, 295 K): δ [ppm] = -560.18 (*s*).

HR-MS (ESI, negative, THF): calcd. for [C<sub>36</sub>H<sub>48</sub>N<sub>4</sub>SnSe+H]<sup>-</sup>(H<sup>+</sup> from ESI atmosphere) *m/z* = 735.2225, found *m/z* = 735.2225.

### 3.5 Tetraphenylphosphonium $^1\eta$ -(tin(II) *meso*-octaethylcalix[4]pyrrolate) pentacarbonyl tungsten(0) $[(PPh_4)_2][W(^1\eta-2)(CO)_5]$

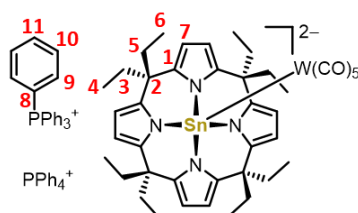

Tungsten hexacarbonyl (3.0 eq, 107.7  $\mu\text{mol}$ , 38 mg) was suspended in 1.0 mL THF in a quartz glass flask and irradiated with a Hg-lamp for 4 hours until gas evolution stopped and solid got dissolved into a clear yellow solution.  $[(PPh_4)_2(\sigma\text{DFB})_{0.5}][2]$  (1.0 eq, 35.9  $\mu\text{mol}$ , 50 mg) was added to the solution and stirred for 36 hours at room temperature. The solvent was removed at reduced pressure. Crystallization from a concentrated solution in acetonitrile (MeCN) layered with pentane at  $-30\text{ }^\circ\text{C}$  yielded  $[(PPh_4)_2][W(^1\eta-2)(CO)_5]$  as a yellow-orange crystalline solid (35 mg, 21.9  $\mu\text{mol}$ , 61% yield). Storing a concentrated solution of  $[(PPh_4)_2][W(^1\eta-2)(CO)_5]$  in MeCN at room temperature yielded single crystals suitable for X-ray diffraction.

$^1\text{H NMR}$  [ $^1\text{H}$ ,  $^1\text{H}$ ,  $^1\text{H}$ -COSY] (600.18 MHz,  $\text{CD}_3\text{CN}$ , 295 K):  $\delta$  [ppm] = 7.92 – 7.87 (*m*,  $H_{11}$ , 8H), 7.74 – 7.70 (*m*,  $H_{10}$ , 16H), 7.68 – 7.63 (*m*,  $H_9$ , 16H), 5.77 (*s*,  $H_7$ , 8H), 1.92 (*q*,  $^3J_{\text{H,H}} = 7.4\text{ Hz}$ , 8H), 1.86 (*q*,  $^3J_{\text{H,H}} = 7.1\text{ Hz}$ , 8H), 0.65 (*t*,  $^3J_{\text{H,H}} = 7.1\text{ Hz}$ , 12H), 0.50 (*t*,  $^3J_{\text{H,H}} = 7.4\text{ Hz}$ , 12H).

$^{13}\text{C NMR}$  [ $^{13}\text{C}\{^1\text{H}\}$ ,  $^{13}\text{C}$ -DEPT135,  $^1\text{H}$ ,  $^{13}\text{C}$ -HSQC,  $^1\text{H}$ ,  $^{13}\text{C}$ -HMBC] (150.92 MHz,  $\text{CD}_3\text{CN}$ , 295 K):  $\delta$  [ppm] = 202.48 (*s*, CO), 143.90 (*s*,  $C_1$ ), 136.39 (*d*,  $^4J_{\text{P,C}} = 3.0\text{ Hz}$ ,  $\text{CH}_{11}$ ), 135.68 (*d*,  $^2J_{\text{P,C}} = 10.5\text{ Hz}$ ,  $\text{CH}_9$ ), 131.31 (*d*,  $^3J_{\text{P,C}} = 13.07\text{ Hz}$ ,  $\text{CH}_{10}$ ), 118.89 (*d*,  $^1J_{\text{P,C}} = 90.6\text{ Hz}$ ,  $C_8$ ), 105.07 (*s*,  $C_7\text{H}$ ), 46.28 (*s*,  $C_2$ ), 42.25 (*s*,  $C_5\text{H}_2$ ), 34.10 (*s*,  $C_3\text{H}_2$ ), 10.90 (*s*,  $C_4\text{H}_3$ ), 10.50 (*s*,  $C_6\text{H}_3$ ).

$^{31}\text{P}\{^1\text{H}\}$  NMR (161.88 MHz,  $\text{CD}_3\text{CN}$ , 295 K):  $\delta$  [ppm] = 22.92 (*s*,  $\text{PPh}_4^+$ ).

$^{119}\text{Sn NMR}$  [ $^{119}\text{Sn}$ ,  $^1\text{H}$ -HMBC] (223.81 MHz,  $\text{CD}_3\text{CN}$ , 295 K):  $\delta$  [ppm] =  $-482.78$ .

**EA:** calcd. for  $\text{C}_{89}\text{H}_{88}\text{N}_4\text{O}_5\text{P}_2\text{SnW}$ : C, 64.47; H, 5.35; N, 3.38; O, 4.82; P, 3.74; Sn, 7.16; W, 11.09. Found: C, 63.10; H, 5.38; N, 3.43. Low carbon content might be related to metal carbide formation during combustion.<sup>[19]</sup>

**3.6 Tetrabutylammonium  $^1\eta$ -(tin(II) *meso*-octaethylcalix[4]pyrrolate) triscarbonyl nickel(0) [(NBu<sub>4</sub>)<sub>2</sub>][Ni( $^1\eta$ -2)(CO)<sub>3</sub>]**

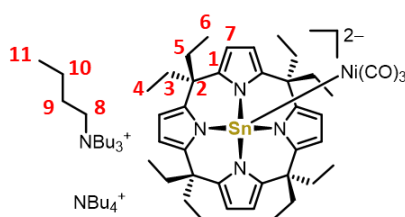

Bis(cyclooctadiene)nickel(0) (1.3 eq, 57.0  $\mu\text{mol}$ , 15.7 mg) and [(NBu<sub>4</sub>)<sub>2</sub>][2] (1.0 eq, 43.85  $\mu\text{mol}$ , 50 mg) were dissolved in 0.5 mL THF-*d*<sub>8</sub> in a NMR pressure tube yielding a yellow clear solution. Addition of 3 atm CO gas and mixing at room temperature for 30 minutes caused the discoloration of the solution. Evaporation of the solvent at reduced pressure and washing of the crude with 5 mL pentane yielded [(NBu<sub>4</sub>)<sub>2</sub>][Ni( $^1\eta$ -2)(CO)<sub>3</sub>] as an off-white crystalline solid (45 mg, 35.9  $\mu\text{mol}$ , 82% yield).

**$^1\text{H}$  NMR** [ $^1\text{H}$ ,  $^1\text{H}$ ,  $^1\text{H}$ -COSY] (600.18 MHz, THF-*d*<sub>8</sub>, 295 K):  $\delta$  [ppm] = 5.72 (*s*, *H*<sub>7</sub>, 8H), 2.94 – 2.74 (*m*, *H*<sub>8</sub>, 16H), 2.09 (*q*,  $^3J_{\text{H,H}} = 6.3$  Hz, *H*<sub>3</sub>, 8H), 2.05 (*q*,  $^3J_{\text{H,H}} = 6.1$  Hz, *H*<sub>5</sub>, 8H), 1.45 – 1.34 (*m*, *H*<sub>9</sub>, 16H), 1.34 – 1.29 (*m*, 7H), 1.29 – 1.22 (*m*, *H*<sub>10</sub>, 16H), 1.16 (*t*,  $^3J_{\text{H,H}} = 7.2$  Hz, *H*<sub>4</sub>, 12H), 0.92 (*t*,  $^3J_{\text{H,H}} = 7.3$  Hz, *H*<sub>11</sub>, 24H), 0.40 (*t*,  $^3J_{\text{H,H}} = 7.3$  Hz, *H*<sub>6</sub>, 12H).

**$^{13}\text{C}$  NMR** [ $^{13}\text{C}\{^1\text{H}\}$ ,  $^{13}\text{C}$ -DEPT135,  $^1\text{H}$ ,  $^{13}\text{C}$ -HSQC,  $^1\text{H}$ ,  $^{13}\text{C}$ -HMBC] (150.92 MHz, THF-*d*<sub>8</sub>, 295 K):  $\delta$  [ppm] = 198.46 (*s*, CO), 141.89 (*s*, *C*<sub>1</sub>), 99.89 (*s*, *C*<sub>7</sub>H), 56.14 (*s*, *C*<sub>8</sub>H<sub>2</sub>), 42.74 (*s*, *C*<sub>2</sub>), 38.65 (*s*, *C*<sub>5</sub>H<sub>2</sub>), 26.37 (*s*, *C*<sub>3</sub>H<sub>2</sub>), 23.55 (*s*, *C*<sub>9</sub>H<sub>2</sub>), 20.38 (*s*, *C*<sub>10</sub>H<sub>2</sub>), 11.39 (*s*, *C*<sub>11</sub>H<sub>3</sub>), 9.02 (*s*, *C*<sub>4</sub>H<sub>3</sub>), 7.04 (*s*, *C*<sub>6</sub>H<sub>3</sub>).

**$^{119}\text{Sn}$  NMR** [ $^{119}\text{Sn}$ ,  $^1\text{H}$ -HMBC] (223.81 MHz, THF-*d*<sub>8</sub>, 295 K):  $\delta$  [ppm] = -335.24 (*s*).

**EA:** calcd. for C<sub>71</sub>H<sub>120</sub>N<sub>6</sub>O<sub>3</sub>NiSn: C, 66.42; H, 9.43; N, 6.55; O, 3.74; Ni, 4.52; Sn, 9.35. Found: C, 66.01; H, 9.73; N, 6.44.

### 3.7 Ruthenium(II) $^5\eta$ -(tin(II) *meso*-octaethylcalix[4]pyrrolate) *para*-cymene Ru( $^5\eta$ -2)(*p*-cymene)

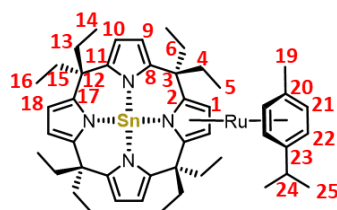

[Li<sub>2</sub>(thf)<sub>x</sub>][2] ( $x = 4.2, 1.0$  eq, 102.85  $\mu\text{mol}$ , 100 mg) and {[Ru(Cl)(*p*-cymene)}<sub>2</sub>( $\mu$ -Cl)<sub>2</sub>] (0.5 eq, 51.43  $\mu\text{mol}$ , 31.5 mg) were dissolved in 4 mL THF and stirred at room temperature for 1 hour. The solvent was evaporated at reduced pressure and the remaining extracted with 6 mL *o*DFB. Filtration of the extract over a PTFE syringe filter (pore size 0.22  $\mu\text{m}$ ) to remove the lithium chloride formed during the reaction followed by the evaporation of the *o*DFB at reduced pressure yielded Ru( $^5\eta$ -2)(*p*-cymene) as an orange solid (83.5 mg, 93.58  $\mu\text{mol}$ , 91% yield). Keeping a concentrated solution of Ru( $^5\eta$ -2)(*p*-cymene) in benzene for 12 hours at room temperature yielded single crystals suitable for X-ray diffraction.

$^1\text{H NMR}$  [ $^1\text{H}$ ,  $^1\text{H}$ , $^1\text{H}$ -COSY] (399.89 MHz, THF-*d*<sub>8</sub>, 295 K):  $\delta$  [ppm] = 5.99 (*d*,  $^3J_{\text{H,H}} = 3.20$  Hz,  $H_{9,10}$ , 2H), 5.93 (*d*,  $^3J_{\text{H,H}} = 3.20$  Hz,  $H_{9,10}$ , 2H), 5.91 (*s*,  $H_{1,18}$ , 2H), 5.76 (*s*,  $H_{1,18}$ , 2H), 5.46 (*d*,  $^3J_{\text{H,H}} = 6.20$  Hz,  $H_{22}$ , 2H), 5.06 (*d*,  $^3J_{\text{H,H}} = 6.10$  Hz,  $H_{21}$ , 2H), 2.71 (*hept*,  $^3J_{\text{H,H}} = 6.90$  Hz,  $H_{24}$ , 1H), 2.21 – 2.09 (*m*,  $H_{4,6,13,15}$ , 10H), 2.08 – 1.98 (*m*,  $H_{4,15}$ , 2H), 1.87 – 1.80 (*m*,  $H_{4,15}$ , 4H), 1.23 (*t*,  $^3J_{\text{H,H}} = 7.3$  Hz,  $H_{9,14}$ , 6H), 1.14 (*d*,  $^3J_{\text{H,H}} = 6.9$  Hz,  $H_{25}$ , 6H), 1.09 (*t*,  $^3J_{\text{H,H}} = 7.2$  Hz,  $H_{9,14}$ , 6H), 0.96 (*s*,  $H_{19}$ , 3H), 0.56 (*t*,  $^3J_{\text{H,H}} = 7.3$  Hz,  $H_{5,16}$ , 6H), 0.50 (*t*,  $^3J_{\text{H,H}} = 7.3$  Hz,  $H_{5,16}$ , 6H).

$^{13}\text{C NMR}$  [ $^{13}\text{C}\{^1\text{H}\}$ ,  $^{13}\text{C}$ -DEPT135,  $^1\text{H}$ , $^{13}\text{C}$ -HSQC,  $^1\text{H}$ , $^{13}\text{C}$ -HMBC] (150.92 MHz, C<sub>6</sub>D<sub>6</sub>, 295 K):  $\delta$  [ppm] = 146.05 (*s*,  $C_{8,11}$ ), 142.32 (*s*,  $C_{2,17}$ ), 136.13 (*s*,  $C_{8,11}$ ), 134.27 (*s*,  $C_{2,17}$ ), 110.68 (*s*,  $C_{20}$ ), 110.53 (*s*,  $C_{23}$ ), 105.49 (*s*,  $C_{9,10,18\text{H}}$ ), 105.26 (*s*,  $C_{9,10,18\text{H}}$ ), 105.00 (*s*,  $C_{9,10,18\text{H}}$ ), 103.57 (*s*,  $C_{1\text{H}}$ ), 89.82 (*s*,  $C_{21,22\text{H}}$ ), 76.72 (*s*,  $C_{21,22\text{H}}$ ), 46.40 (*s*,  $C_{3,12}$ ), 43.42 (*s*,  $C_{3,12}$ ), 34.44 (*s*,  $C_{24\text{H}}$ ), 31.13 (*s*,  $C_{6,15\text{H}_2}$ ), 29.54 (*s*,  $C_{6,15\text{H}_2}$ ), 28.65 (*s*,  $C_{4,13\text{H}_2}$ ), 27.07 (*s*,  $C_{4,13\text{H}_2}$ ), 17.29 (*s*,  $C_{19\text{H}_3}$ ), 11.41 (*s*,  $C_{25\text{H}_3}$ ), 10.26 (*s*,  $C_{4,13\text{H}_3}$ ), 10.02 (*s*,  $C_{4,13\text{H}_3}$ ), 9.44 (*s*,  $C_{6,15\text{H}_3}$ ), 8.18 (*s*,  $C_{6,15\text{H}_3}$ ).

$^{119}\text{Sn NMR}$  [ $^{119}\text{Sn}$ , $^1\text{H}$ -HMBC] (149.12 MHz, THF-*d*<sub>8</sub>, 295 K):  $\delta$  [ppm] = -424.83 (*s*).

**EA:** calcd. for C<sub>46</sub>H<sub>62</sub>N<sub>4</sub>RuSn: C, 61.86; H, 7.00; N, 6.28; Ru, 11.42; Sn, 13.44. Found: C, 61.78; H, 7.03; N, 6.24.

### 3.8 Reaction of $[\text{Li}_2(\text{thf})_x][\mathbf{2}]$ with Electrophiles

$[\text{Li}_2(\text{thf})_x][\mathbf{2}]$  ( $x = 4.2$ , 1.0 eq, 17.54  $\mu\text{mol}$ , 17.0 mg) was dissolved in 0.45 mL toluene- $d_8$  and one equivalent of the respective electrophile was added in one portion at room temperature. The reaction conditions for each electrophile are summarized in Table S1 below. The reaction products were characterized by  $^1\text{H}$ ,  $^{13}\text{C}$ ,  $^{119}\text{Sn}$  as well as 2D-NMR methods and HRMS ESI(-) measurements. For Entry 3 storing of the reaction solution at  $-30^\circ\text{C}$  after removal of the precipitated lithium chloride yielded single crystals suitable for X-ray diffraction.

**Table S1:** Reaction conditions for the reaction of  $[\text{Li}_2(\text{thf})_x][\mathbf{2}]$  with electrophiles.

| Entry | Electrophile                   | Reaction Conditions                                     |
|-------|--------------------------------|---------------------------------------------------------|
| 1     | Methylene chloride             | No reaction                                             |
| 2     | Benzyl chloride                | Unselective reaction forming mixture of compounds       |
| 3     | Benzoyl chloride               | Reaction completed at rt within minutes                 |
| 4     | Benzaldehyde                   | Reacted at rt over 20 hours, formation of side products |
| 5     | 4- $\text{CF}_3$ -Benzaldehyde | Reacted at rt over 20 hours, formation of side products |

#### 3.8.1 Entry 3 (Benzoyl Chloride)

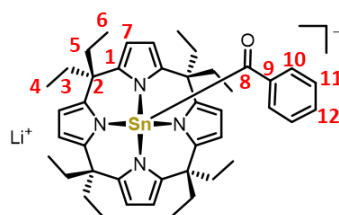

$^1\text{H NMR}$  [ $^1\text{H}$ ,  $^1\text{H}$ ,  $^1\text{H}$ -COSY] (600.15 MHz, Toluene- $d_8$ , 295 K):  $\delta$  [ppm] = 7.26 – 7.21 (*m*,  $H_{10}$ , 2H), 7.00 – 6.98 (*m*,  $H_{11}$ , 2H), 6.94 (*d*,  $^3J_{\text{H,H}} = 7.3$  Hz,  $H_{12}$ , 1H), 6.29 (*s*,  $H_7$ , 8H), 2.04 (*q*,  $^3J_{\text{H,H}} = 7.2$  Hz,  $H_3$ , 8H), 1.95 (*q*,  $^3J_{\text{H,H}} = 7.3$  Hz,  $H_5$ , 8H), 0.91 (*t*,  $^3J_{\text{H,H}} = 7.2$  Hz,  $H_4$ , 13H), 0.86 (*t*,  $^3J_{\text{H,H}} = 7.3$  Hz,  $H_6$ , 13H).

$^{13}\text{C NMR}$  [ $^{13}\text{C}\{^1\text{H}\}$ ,  $^{13}\text{C}$ -DEPT135,  $^1\text{H}$ ,  $^{13}\text{C}$ -HSQC,  $^1\text{H}$ ,  $^{13}\text{C}$ -HMBC] (150.92 MHz, Toluene- $d_8$ , 295 K):  $\delta$  [ppm] = 143.93 (*s*,  $C_1$ ), 134.91 (*s*,  $C_{12}\text{H}$ ), 131.40 (*s*,  $C_9$ ), 129.15 (*s*,  $C_{10}\text{H}$ ), 128.22 (*s*,  $C_{11}\text{H}$ ), 125.38 (*s*,  $C_8$ ), 106.57 (*s*,  $^{117/119}\text{Sn}$ -satellites  $^3J_{\text{Sn,C}} = 30$  Hz,  $C_7\text{H}$ ), 67.86 (*s*,  $C_{\text{thfH}_2}$ ), 45.60 (*s*,  $^{117/119}\text{Sn}$ -satellites  $^3J_{\text{Sn,C}} = 7.5$  Hz,  $C_2$ ), 40.42 ( $C_5\text{H}_2$ ), 34.89 (*s*,  $C_3\text{H}_2$ ), 25.67 (*s*,  $C_{\text{thfH}_2}$ ), 10.14 (*s*,  $C_4\text{H}_3$ ), 10.02 (*s*,  $C_6\text{H}_3$ ).

$^{119}\text{Sn NMR}$  [ $^{119}\text{Sn}$ ,  $^1\text{H}$ -HMBC] (149.12 MHz, Toluene- $d_8$ , 295 K):  $\delta$  [ppm] =  $-487.99$ .

**HR-MS** (ESI, negative, THF): calcd. for  $\text{C}_{43}\text{H}_{53}\text{N}_4\text{Osn}^-$   $m/z = 761.3267$ , found  $m/z = 761.3283$ .

#### 3.8.2 Entry 4 (Benzaldehyde)

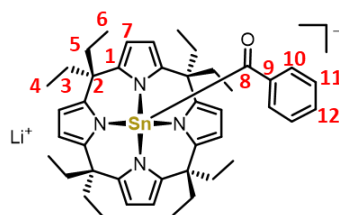

**HR-MS** (ESI, negative, THF): calcd. for  $\text{C}_{43}\text{H}_{53}\text{N}_4\text{OSn}^-$   $m/z = 761.3267$ , found  $m/z = 761.3243$ .

### 3.8.3 Entry 5 (4-CF<sub>3</sub>-Benzaldehyde)

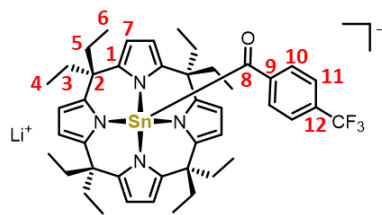

**<sup>1</sup>H NMR** [<sup>1</sup>H, <sup>1</sup>H, <sup>1</sup>H-COSY] (399.89 MHz, Toluene-*d*<sub>8</sub>, 295 K):  $\delta$  [ppm] = 7.41 (*d*, <sup>3</sup>*J*<sub>H,H</sub> = 7.8 Hz, *H*<sub>10</sub>, 2H), 6.98 (*d*, <sup>3</sup>*J*<sub>H,H</sub> = 7.8 Hz, *H*<sub>11</sub>, 2H), 6.34 (*s*, *H*<sub>7</sub>, 8H), 1.94 (*q*, <sup>3</sup>*J*<sub>H,H</sub> = 7.3 Hz, *H*<sub>3</sub>, 8H), 1.75 (*q*, <sup>3</sup>*J*<sub>H,H</sub> = 7.3 Hz, *H*<sub>5</sub>, 8H), 0.76 (*t*, <sup>3</sup>*J*<sub>H,H</sub> = 7.1 Hz, *H*<sub>4</sub>, 12H), 0.73 (*t*, <sup>3</sup>*J*<sub>H,H</sub> = 7.1 Hz, *H*<sub>6</sub>, 12H).

**<sup>13</sup>C NMR** [<sup>13</sup>C{<sup>1</sup>H}, <sup>13</sup>C-DEPT135, <sup>1</sup>H, <sup>13</sup>C-HSQC, <sup>1</sup>H, <sup>13</sup>C-HMBC] (100.55 MHz, Toluene-*d*<sub>8</sub>, 295 K):  $\delta$  [ppm] = 145.40 (*s*, *C*<sub>1</sub>), 136.11 (*s*, *C*<sub>12</sub>), 129.16 (*s*, *C*<sub>9</sub>), 127.82 (*s*, *C*<sub>10H</sub>), 126.35 (*s*, *C*<sub>11H</sub>), 126.31 (*s*, *C*<sub>8</sub>), 106.64 (*m*, *CF*<sub>3</sub>), 105.45 (*s*, *C*<sub>7H</sub>), 47.20 (*s*, *C*<sub>2</sub>), 35.61 (*C*<sub>5H</sub><sub>2</sub>), 35.04 (*s*, *C*<sub>3H</sub><sub>2</sub>), 10.02 (*s*, *C*<sub>4H</sub><sub>3</sub>), 9.71 (*s*, *C*<sub>6H</sub><sub>3</sub>).

**<sup>19</sup>F NMR** (149.12 MHz, THF-*d*<sub>8</sub>, 295 K):  $\delta$  [ppm] = -62.36.

**<sup>119</sup>Sn NMR** [<sup>119</sup>Sn, <sup>1</sup>H-HMBC] (149.12 MHz, THF-*d*<sub>8</sub>, 295 K):  $\delta$  [ppm] = -750.37.

**HR-MS** (ESI, negative, THF): calcd. for C<sub>44</sub>H<sub>52</sub>N<sub>4</sub>OF<sub>3</sub>Sn<sup>-</sup> *m/z* = -829.3141, found *m/z* = -829.3159.

### 3.9 Reaction of [(NBu<sub>4</sub>)<sub>2</sub>][2] with Electrophiles

[(NBu<sub>4</sub>)<sub>2</sub>][2] (1.0 eq, 17.54  $\mu$ mol, 20.0 mg) was dissolved in 0.45 mL THF-*d*<sub>8</sub> and one equivalent of the respective electrophile was added in one portion at room temperature. The reaction conditions for each electrophile are summarized in Table S2 below. The products were characterized by <sup>1</sup>H, <sup>13</sup>C, <sup>119</sup>Sn as well as 2D-NMR methods and HRMS ESI(-) measurements.

**Table S2:** Reaction conditions for the reaction of [(NBu<sub>4</sub>)<sub>2</sub>][2] with electrophiles. The yield was determined by NMR spectroscopy.

| Entry | Electrophile                    | Reaction Conditions                                         |
|-------|---------------------------------|-------------------------------------------------------------|
| 1     | Methylene chloride              | Near quantitative yield after mixed at rt for 24h           |
| 2     | Benzyl chloride                 | Near quantitative yield at rt within minutes                |
| 3     | Benzoyl chloride                | Near quantitative yield at rt within minutes                |
| 4     | Benzaldehyde                    | No reaction                                                 |
| 5     | 4-CF <sub>3</sub> -Benzaldehyde | No reaction                                                 |
| 6     | Iodobenzene                     | Quantitative reduction of iodobenzene to benzene at rt, 48h |

### 3.9.1 Entry 1 (Methylene Chloride)

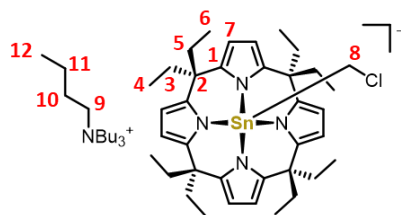

**$^1\text{H}$  NMR** [ $^1\text{H}$ ,  $^1\text{H}$ ,  $^1\text{H}$ -COSY] (399.89 MHz, THF- $d_8$ , 295 K):  $\delta$  [ppm] = 5.90 (s,  $^{117/119}\text{Sn}$ -satellites  $^4J_{\text{Sn,H}} = 8.0$  Hz,  $H_7$ , 8H), 3.56 – 3.35 (m,  $H_{13}$ , 16H), 2.67 (s,  $^{117/119}\text{Sn}$ -satellites  $^2J_{\text{Sn,H}} = 36.0$  Hz,  $H_8$ , 2H), 1.90 (q,  $^3J_{\text{H,H}} = 7.2$  Hz,  $H_5$ , 8H), 1.86 (q,  $^3J_{\text{H,H}} = 7.2$  Hz,  $H_3$ , 8H), 1.78 – 1.68 (m,  $H_{14}$  16H, overlaid with THF- $d_8$ ), 1.46 – 1.35 (m,  $H_{15}$ , 16H), 0.99 (t,  $^3J_{\text{H,H}} = 7.4$  Hz,  $H_{16}$ , 24H), 0.75 (t,  $^3J_{\text{H,H}} = 7.2$  Hz,  $H_4$ , 12H), 0.62 (t,  $^3J_{\text{H,H}} = 7.3$  Hz,  $H_6$ , 12H).

**$^{13}\text{C}$  NMR** [ $^{13}\text{C}\{^1\text{H}\}$ ,  $^{13}\text{C}$ -DEPT135,  $^1\text{H}$ ,  $^{13}\text{C}$ -HSQC,  $^1\text{H}$ ,  $^{13}\text{C}$ -HMBC] (100.55 MHz, THF- $d_8$ , 295 K):  $\delta$  [ppm] = 143.56 (s,  $^{117/119}\text{Sn}$ -satellites  $^3J_{\text{Sn,C}} = 8.0$  Hz,  $C_1$ ), 106.22 (s,  $^{117/119}\text{Sn}$ -satellites  $^3J_{\text{Sn,C}} = 23.1$  Hz,  $C_7\text{H}$ ), 59.64 (s,  $C_9\text{H}_2$ ), 46.49 (s,  $C_2$ ), 40.26 (s,  $C_{3,5}\text{H}_2$ ), 38.74 (s,  $C_8\text{H}_2$ ), 36.05 (s,  $C_{3,5}\text{H}_2$ ), 25.15 (s,  $C_{10}\text{H}_2$ ), 20.90 (s,  $C_{11}\text{H}_2$ ), 14.28 (s,  $C_{12}\text{H}_3$ ), 10.92 (s,  $C_{4,6}\text{H}$ ), 10.52 (s,  $C_{4,6}\text{H}$ ).

**$^{119}\text{Sn}$  NMR** [ $^{119}\text{Sn}\{^1\text{H}\}$ ,  $^{119}\text{Sn}$ ,  $^1\text{H}$ -HMBC] (149.12 MHz, THF- $d_8$ , 295 K):  $\delta$  [ppm] = -477.52.

**HR-MS** (ESI, negative, THF): calcd. for  $\text{C}_{37}\text{H}_{50}\text{N}_4\text{SnCl}^-$   $m/z = 747.3448$ , found  $m/z = 747.3456$ .

### 3.9.2 Entry 2 (Benzyl chloride)

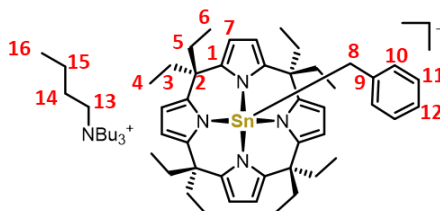

**$^1\text{H}$  NMR** [ $^1\text{H}$ ,  $^1\text{H}$ ,  $^1\text{H}$ -COSY] (399.89 MHz, THF- $d_8$ , 295 K):  $\delta$  [ppm] = 6.78 – 6.69 (m,  $H_{11}$ , 2H), 6.67 – 6.60 (m,  $H_{12}$ , 1H), 6.33 – 6.25 (m,  $H_{10}$ , 2H), 5.95 (s,  $^{117/119}\text{Sn}$ -satellites  $^4J_{\text{Sn,H}} = 8.0$  Hz,  $H_7$ , 8H), 3.55 – 3.42 (m,  $H_{13}$ , 16H), 2.20 (s,  $^{119}\text{Sn}$ -satellites  $^2J_{\text{Sn,H}} = 116.6$  Hz,  $^{117}\text{Sn}$ -satellites  $^2J_{\text{Sn,H}} = 111.2$  Hz,  $H_8$ , 2H), 1.83 – 1.68 (m,  $H_{3,5,14}$  32H), 1.46 – 1.35 (m,  $H_{15}$ , 16H), 0.99 (t,  $^3J_{\text{H,H}} = 7.4$  Hz,  $H_{16}$ , 24H), 0.60 (t,  $^3J_{\text{H,H}} = 7.1$  Hz,  $H_{4,6}$ , 24H).

**$^{13}\text{C}$  NMR** [ $^{13}\text{C}\{^1\text{H}\}$ ,  $^{13}\text{C}$ -DEPT135,  $^1\text{H}$ ,  $^{13}\text{C}$ -HSQC,  $^1\text{H}$ ,  $^{13}\text{C}$ -HMBC] (100.55 MHz, THF- $d_8$ , 295 K):  $\delta$  [ppm] = 143.91 (s,  $^{117/119}\text{Sn}$ -satellites  $^3J_{\text{Sn,C}} = 8.0$  Hz,  $C_1$ ), 141.46 (s,  $C_9$ ), 130.74 (s,  $C_{10}\text{H}$ ), 128.02 (s,  $C_{11}\text{H}$ ), 123.69 (s,  $C_{12}\text{H}$ ), 106.90 (s,  $^{117/119}\text{Sn}$ -satellites  $^3J_{\text{Sn,C}} = 23.1$  Hz,  $C_7\text{H}$ ), 59.64 (s,  $C_{13}\text{H}_2$ ), 46.65 (s,  $C_2$ ), 39.41 (s,  $C_{3,5}\text{H}_2$ ), 39.37 (s,  $C_{3,5}\text{H}_2$ ), 31.76 (s,  $C_8\text{H}_2$ ), 25.14 (s,  $C_{14}\text{H}_2$ ), 20.89 (s,  $C_{15}\text{H}_2$ ), 14.27 (s,  $C_{16}\text{H}_3$ ), 10.68 (s,  $C_{4,6}\text{H}$ ), 10.62 (s,  $C_{4,6}\text{H}$ ).

**$^{119}\text{Sn}$  NMR** [ $^{119}\text{Sn}\{^1\text{H}\}$ ,  $^{119}\text{Sn}$ ,  $^1\text{H}$ -HMBC] (149.12 MHz, THF- $d_8$ , 295 K):  $\delta$  [ppm] = -409.19 (s).

**HR-MS** (ESI, negative, THF): calcd. for  $\text{C}_{43}\text{H}_{55}\text{N}_4\text{Sn}^-$   $m/z = 747.3448$ , found  $m/z = 747.3456$ .



### 3.9.3 Entry 3 (Benzoyl chloride)

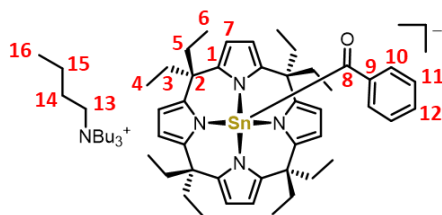

**<sup>1</sup>H NMR** [<sup>1</sup>H, <sup>1</sup>H-<sup>1</sup>H-COSY] (399.89 MHz, THF-*d*<sub>8</sub>, 295 K): δ [ppm] = 7.20 – 7.13 (*m*, *H*<sub>12</sub>, 1H), 7.11 – 7.00 (*m*, *H*<sub>10,11</sub>, 4H), 5.89 (*s*, <sup>117/119</sup>Sn-satellites <sup>4</sup>*J*<sub>Sn,H</sub> = 12.0 Hz, *H*<sub>7</sub>, 8H), 3.54 – 3.44 (*m*, *H*<sub>13</sub>, 16H), 1.83 – 1.68 (*m*, *H*<sub>3,5,14</sub> overlaid, 32H), 1.35 – 1.46 (*m*, *H*<sub>15</sub>, 16H), 0.99 (*t*, <sup>3</sup>*J*<sub>H,H</sub> = 7.4 Hz, *H*<sub>16</sub>, 24H), 0.66 (*t*, <sup>3</sup>*J*<sub>H,H</sub> = 7.1 Hz, *H*<sub>4,6</sub>, 12H), 0.64 (*t*, <sup>3</sup>*J*<sub>H,H</sub> = 7.1 Hz, *H*<sub>4,6</sub>, 12H).

**<sup>13</sup>C NMR** [<sup>13</sup>C{<sup>1</sup>H}, <sup>13</sup>C-DEPT135, <sup>1</sup>H,<sup>13</sup>C-HSQC, <sup>1</sup>H,<sup>13</sup>C-HMBC] (100.55 MHz, THF-*d*<sub>8</sub>, 295 K): δ [ppm] = 235.44 (*s*, *C*<sub>8</sub>), 143.23 (*s*, <sup>117/119</sup>Sn-satellites <sup>3</sup>*J*<sub>Sn,C</sub> = 9.0 Hz, *C*<sub>1</sub>), 143.07 (*s*, *C*<sub>9</sub>), 135.49, 132.20 (*s*, *C*<sub>12</sub>H), 131.37, 129.98, 129.39 (*s*, *C*<sub>10,11</sub>H), 128.93 (*s*, *C*<sub>10,11</sub>H), 106.03 (*s*, <sup>117/119</sup>Sn-satellites <sup>3</sup>*J*<sub>Sn,C</sub> = 26.1 Hz, *C*<sub>7</sub>H), 59.63 (*s*, *C*<sub>13</sub>H<sub>2</sub>), 45.96 (*s*, *C*<sub>2</sub>), 39.07 (*s*, *C*<sub>3,5</sub>H<sub>2</sub>), 37.60 (*s*, *C*<sub>3,5</sub>H<sub>2</sub>), 25.15 (*s*, *C*<sub>14</sub>H<sub>2</sub>), 20.89 (*s*, *C*<sub>15</sub>H<sub>2</sub>), 14.30 (*s*, *C*<sub>16</sub>H<sub>3</sub>), 10.82 (*s*, *C*<sub>4,6</sub>H), 10.54 (*s*, *C*<sub>4,6</sub>H).

**<sup>119</sup>Sn NMR** [<sup>119</sup>Sn{<sup>1</sup>H}, <sup>119</sup>Sn,<sup>1</sup>H-HMBC] (149.12 MHz, THF-*d*<sub>8</sub>, 295 K): δ [ppm] = -542.67.

**HR-MS** (ESI, negative, THF): calcd. for C<sub>43</sub>H<sub>53</sub>N<sub>4</sub>OSn<sup>-</sup> *m/z* = 761.3267, found *m/z* = 761.3256.

### 3.9.4 Entry 6 (Iodobenzene)

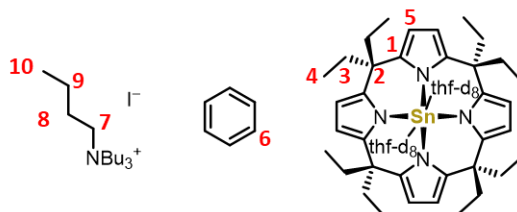

**<sup>1</sup>H NMR** [<sup>1</sup>H, <sup>1</sup>H-<sup>1</sup>H-COSY] (399.89 MHz, THF-*d*<sub>8</sub>, 295 K): δ [ppm] = 7.30 (*s*, *H*<sub>6</sub>, 5H), 6.11 (*s*, <sup>117/119</sup>Sn-satellites <sup>4</sup>*J*<sub>Sn,H</sub> = 16.0 Hz, *H*<sub>5</sub>, 8H), 3.47 – 3.37 (*m*, *H*<sub>7</sub>, 16H), 1.84 (*q*, <sup>3</sup>*J*<sub>H,H</sub> = 7.3 Hz, *H*<sub>3</sub>, 16H), 1.79 – 1.68 (*m*, *H*<sub>7</sub> overlaid, 21H), 1.50 – 1.37 (*m*, *H*<sub>8</sub> overlaid, 25H), 1.36 – 1.25 (*m*, *H*<sub>9</sub> overlaid, 9H), 1.00 (*t*, <sup>3</sup>*J*<sub>H,H</sub> = 7.3 Hz, *H*<sub>10</sub> overlaid, 28H), 0.65 (*t*, <sup>3</sup>*J*<sub>H,H</sub> = 7.3 Hz, *H*<sub>4</sub>, 24H).

**<sup>13</sup>C NMR** [<sup>13</sup>C{<sup>1</sup>H}, <sup>13</sup>C-DEPT135, <sup>1</sup>H,<sup>13</sup>C-HSQC, <sup>1</sup>H,<sup>13</sup>C-HMBC] (100.55 MHz, THF-*d*<sub>8</sub>, 295 K): δ [ppm] = 143.14 (*s*, <sup>117/119</sup>Sn-satellites <sup>2</sup>*J*<sub>Sn,C</sub> = 7.0 Hz, *C*<sub>1</sub>), 129.20 (*s*, *C*<sub>6</sub>), 109.26 (*s*, <sup>117/119</sup>Sn-satellites <sup>2</sup>*J*<sub>Sn,C</sub> = 42.2 Hz, *C*<sub>5</sub>H), 59.76 (*s*, *C*<sub>7</sub>H<sub>2</sub>), 46.78 (*s*, *C*<sub>2</sub>), 30.93 (*s*, *C*<sub>3</sub>H<sub>2</sub>), 25.29 (*s*, overlaid with THF-*d*<sub>8</sub>, *C*<sub>9</sub>H<sub>2</sub>), 20.83 (*s*, *C*<sub>9</sub>H<sub>2</sub>), 14.33 (*s*, *C*<sub>10zz</sub>H<sub>3</sub>), 10.22 (*s*, *C*<sub>4</sub>H<sub>3</sub>).

**<sup>119</sup>Sn NMR** [<sup>119</sup>Sn{<sup>1</sup>H}, <sup>119</sup>Sn,<sup>1</sup>H-HMBC] (149.12 MHz, THF-*d*<sub>8</sub>, 295 K): δ [ppm] = -560.83.

## 4 NMR Spectra

### 4.1 $[\text{Li}_2(\text{thf})_x][\mathbf{2}]$

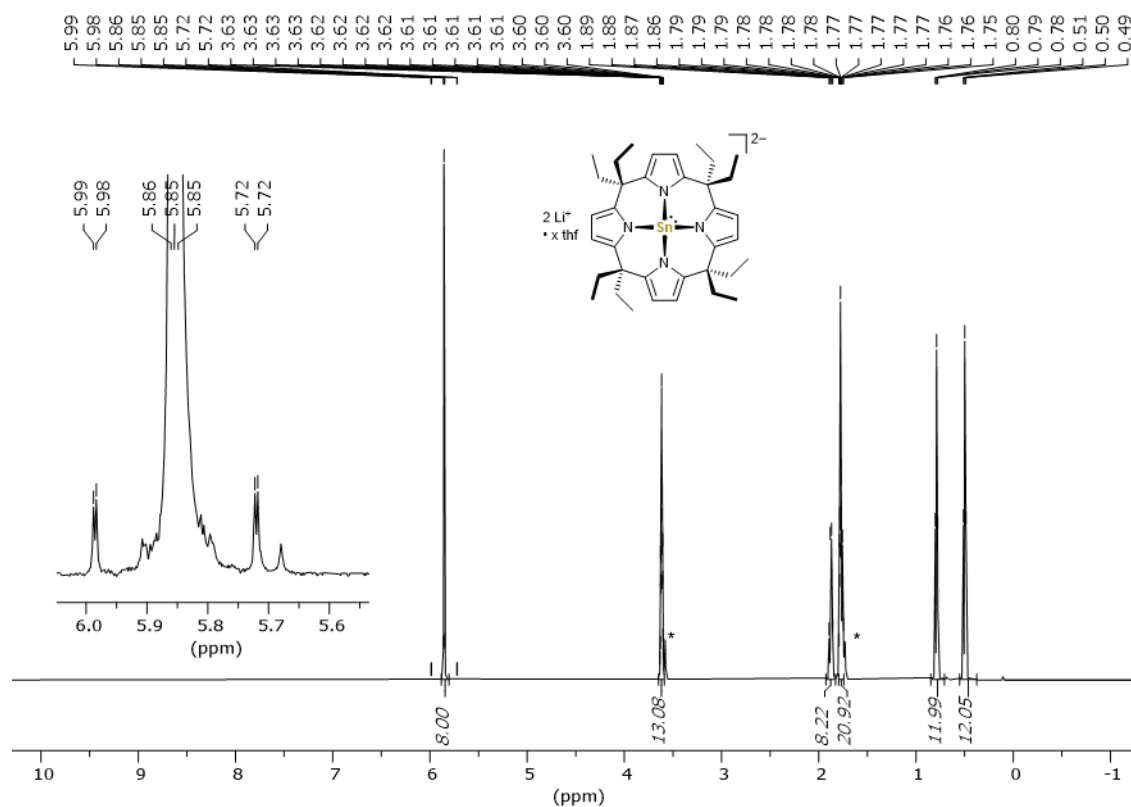

**Figure S1.**  $^1\text{H}$  NMR spectrum of  $[\text{Li}_2(\text{thf})_x][\mathbf{2}]$  (600.18 MHz,  $\text{THF-}d_8$ , 295 K). Solvent resonances are indicated by an asterisk (\*).

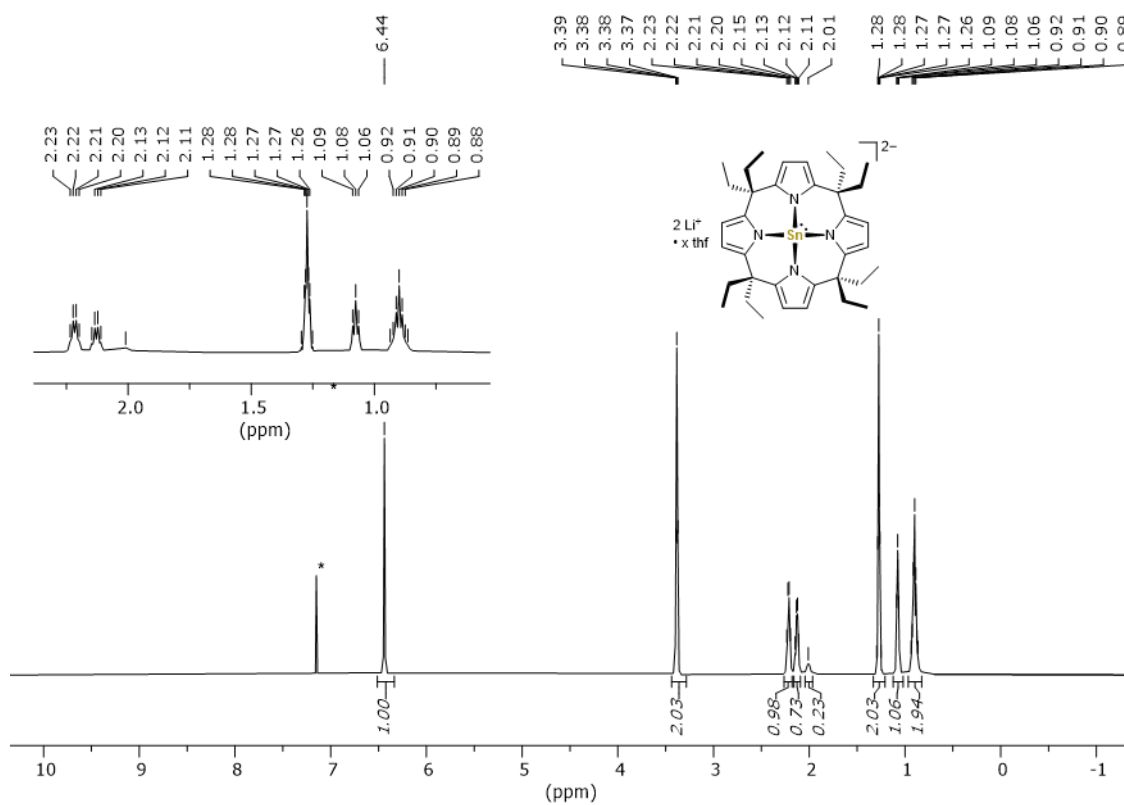

**Figure S2.**  $^1\text{H}$  NMR spectrum of  $[\text{Li}_2(\text{thf})_x][\mathbf{2}]$  (600.18 MHz,  $\text{C}_6\text{D}_6$ , 295 K). Solvent resonances are indicated by an asterisk (\*).

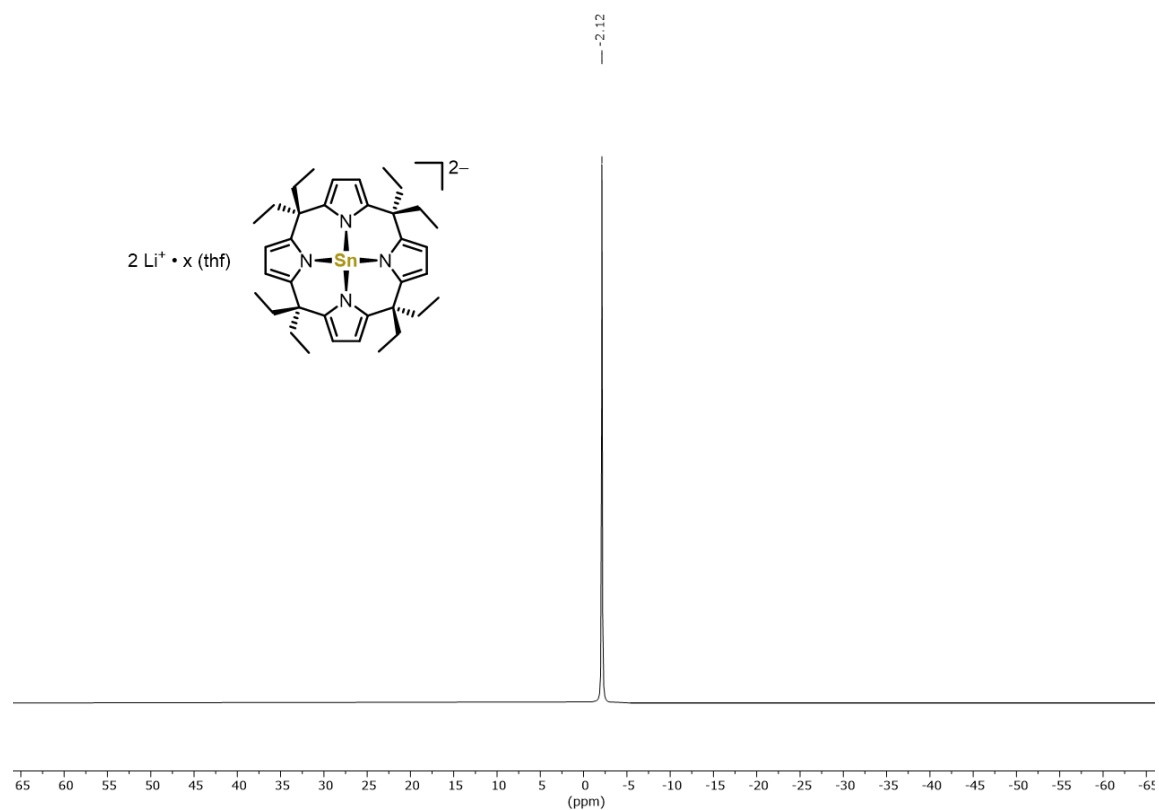

**Figure S3.**  $^7\text{Li}$  NMR spectrum of  $[\text{Li}_2(\text{thf})_x][\mathbf{2}]$  (233.24 MHz,  $\text{THF-}d_8$ , 295 K).

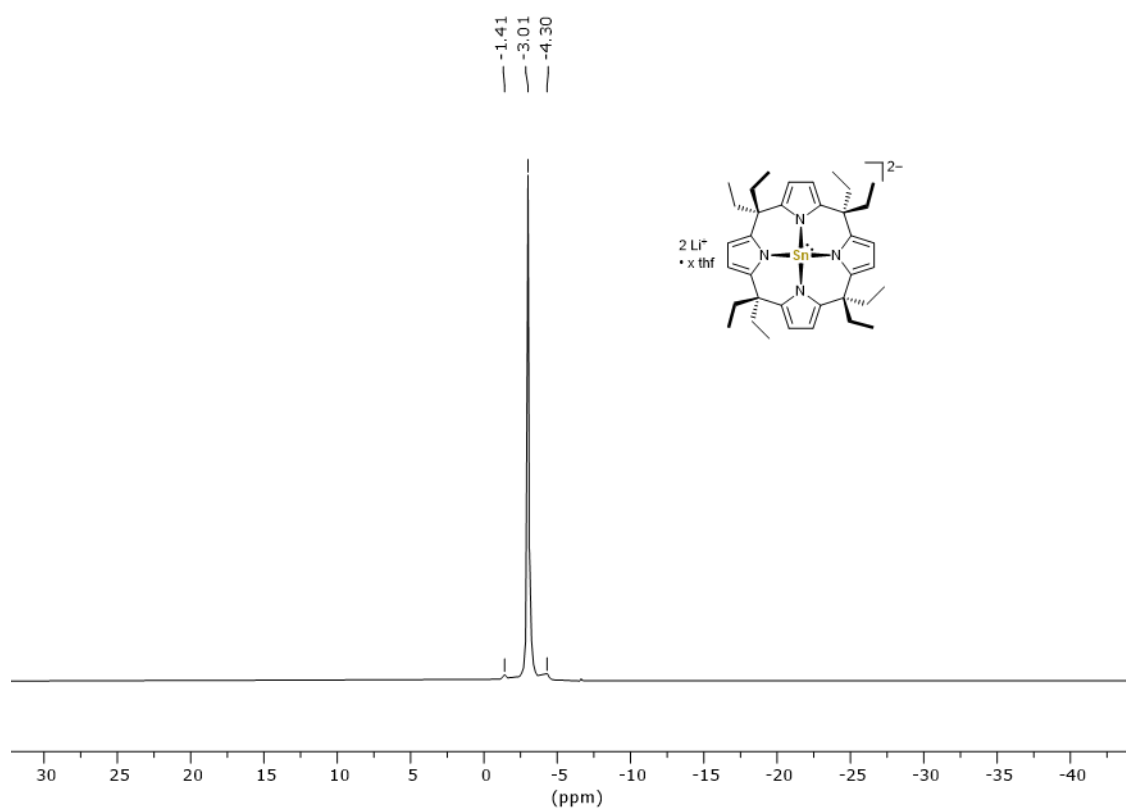

**Figure S4.**  $^7\text{Li}$  NMR spectrum of  $[\text{Li}_2(\text{thf})_x][\mathbf{2}]$  (233.24 MHz,  $\text{C}_6\text{D}_6$ , 295 K).

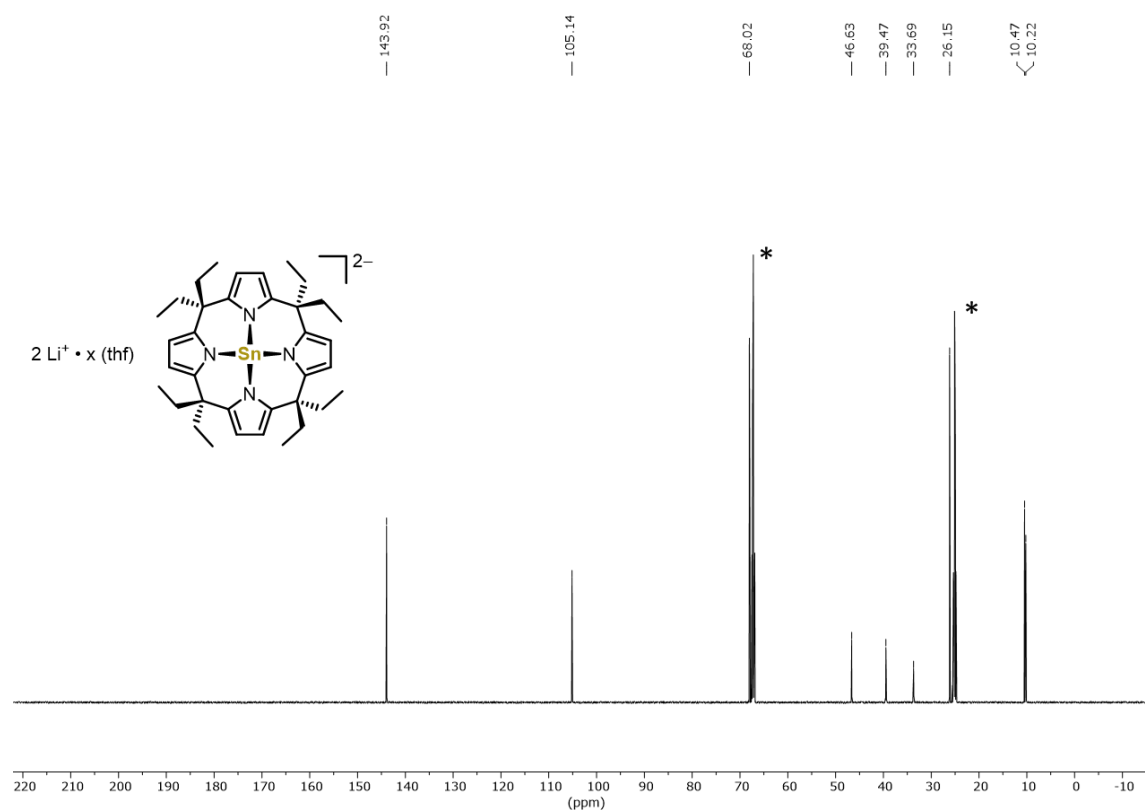

**Figure S5.**  $^{13}\text{C}$  NMR spectrum of  $[\text{Li}_2(\text{thf})_x][\mathbf{2}]$  (150.92 MHz,  $\text{THF-}d_8$ , 295 K). Solvent resonances are indicated by an asterisk (\*).

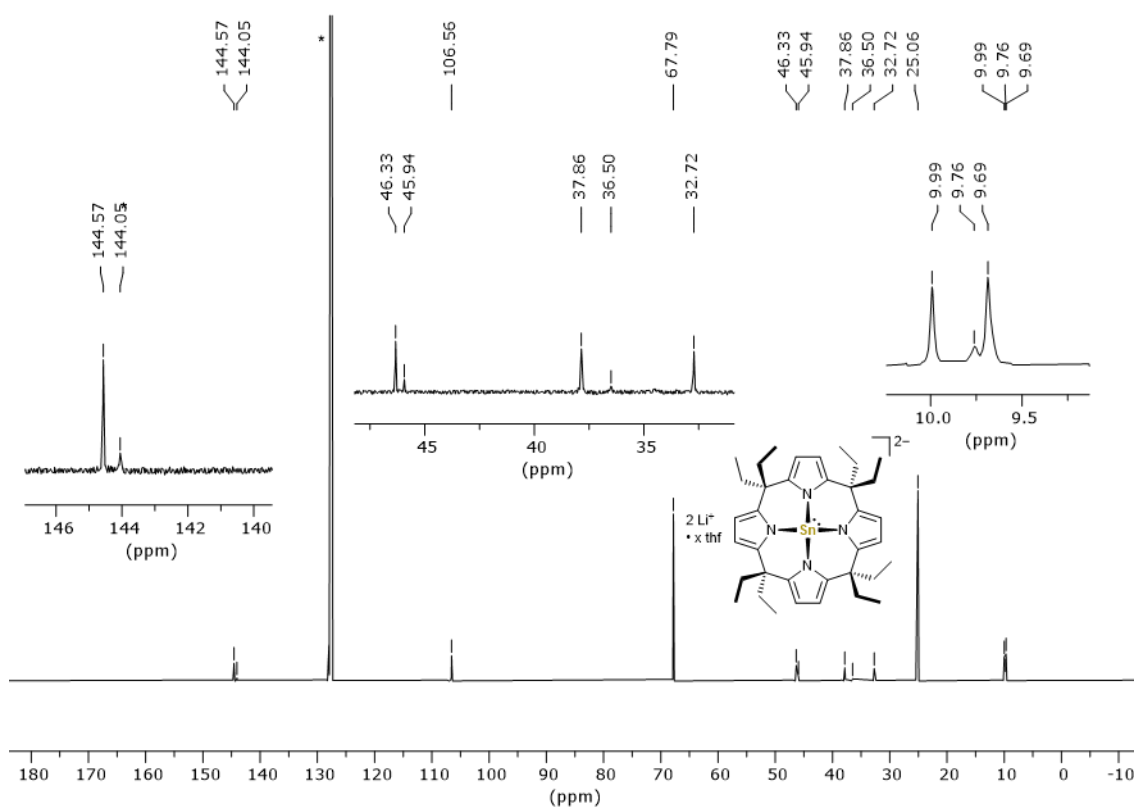

**Figure S6.**  $^{13}\text{C}$  NMR spectrum of  $[\text{Li}_2(\text{thf})_x][\mathbf{2}]$  (150.92 MHz,  $\text{C}_6\text{D}_6$ , 295 K). Solvent resonances are indicated by an asterisk (\*).

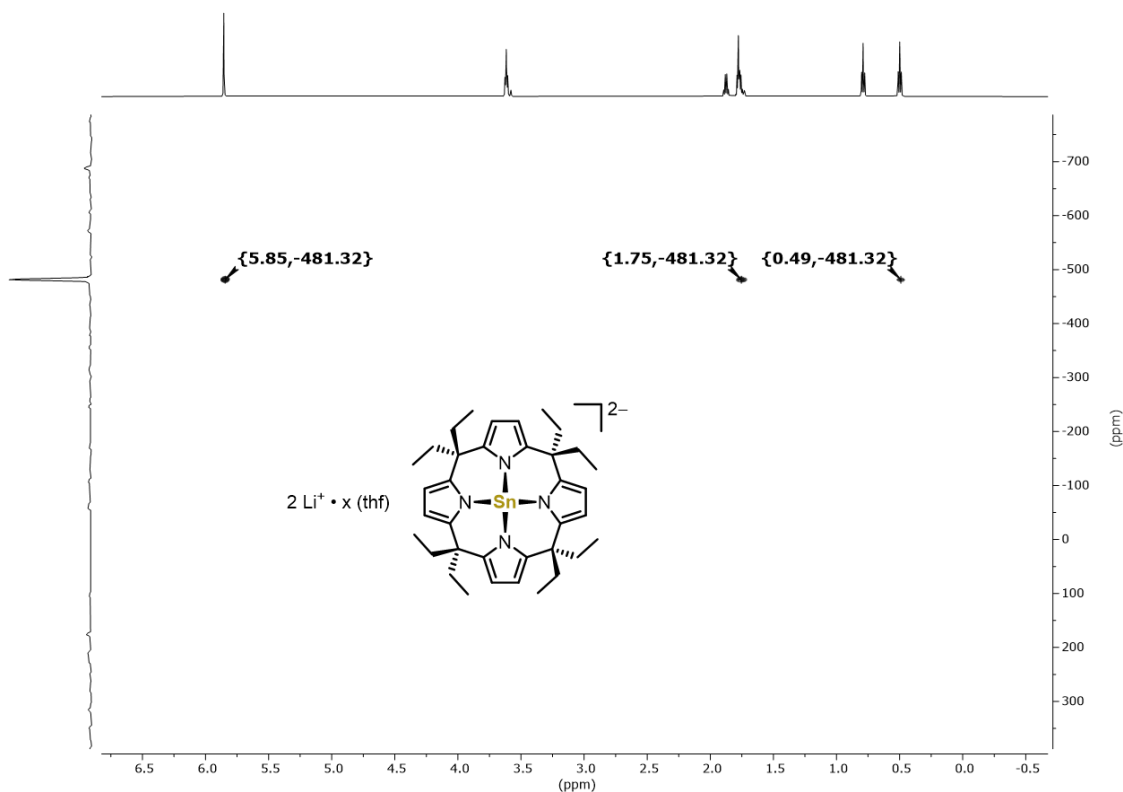

Figure S7.  $^{119}\text{Sn}$ - $^1\text{H}$  HMBC NMR spectrum of  $[\text{Li}_2(\text{thf})_x][\mathbf{2}]$  ( $\text{THF-}d_8$ , 295 K).

#### 4.2 $[(\text{NBu}_4)_2][\mathbf{2}]$

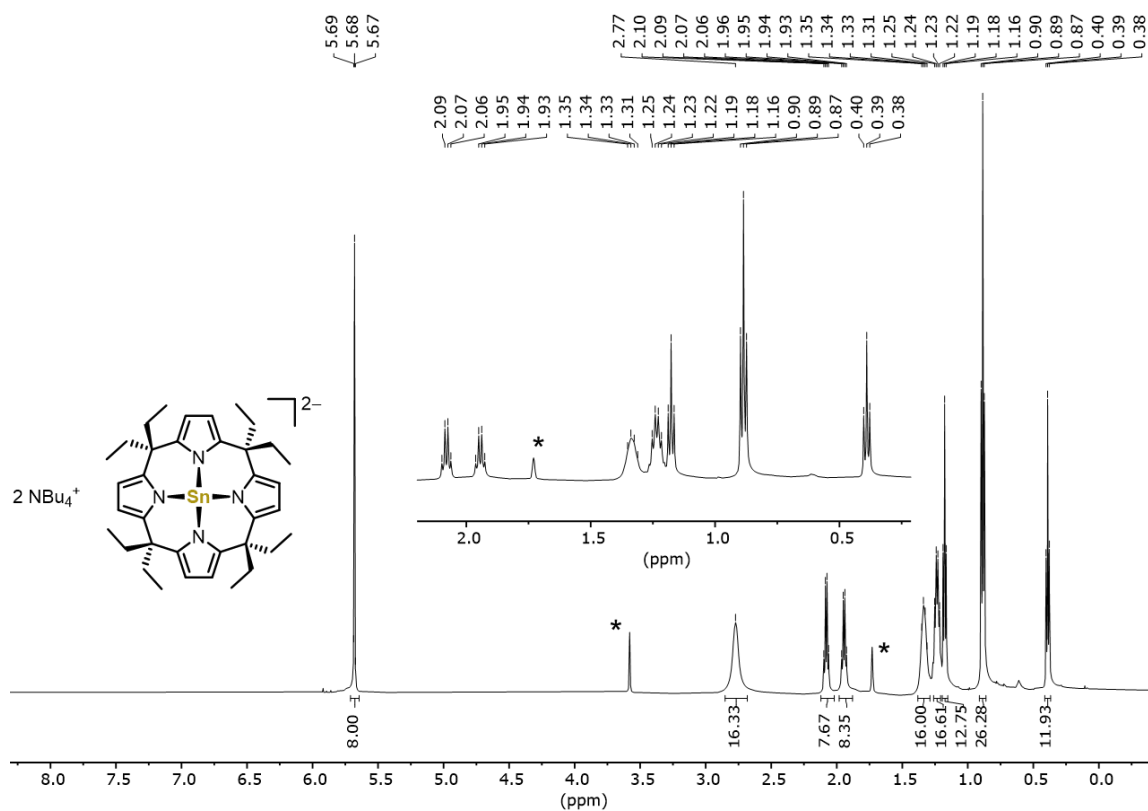

Figure S8.  $^1\text{H}$  NMR spectrum of  $[(\text{NBu}_4)_2][\mathbf{2}]$  (600.18 MHz,  $\text{THF-}d_8$ , 295 K). Solvent resonances are indicated by an asterisk (\*).

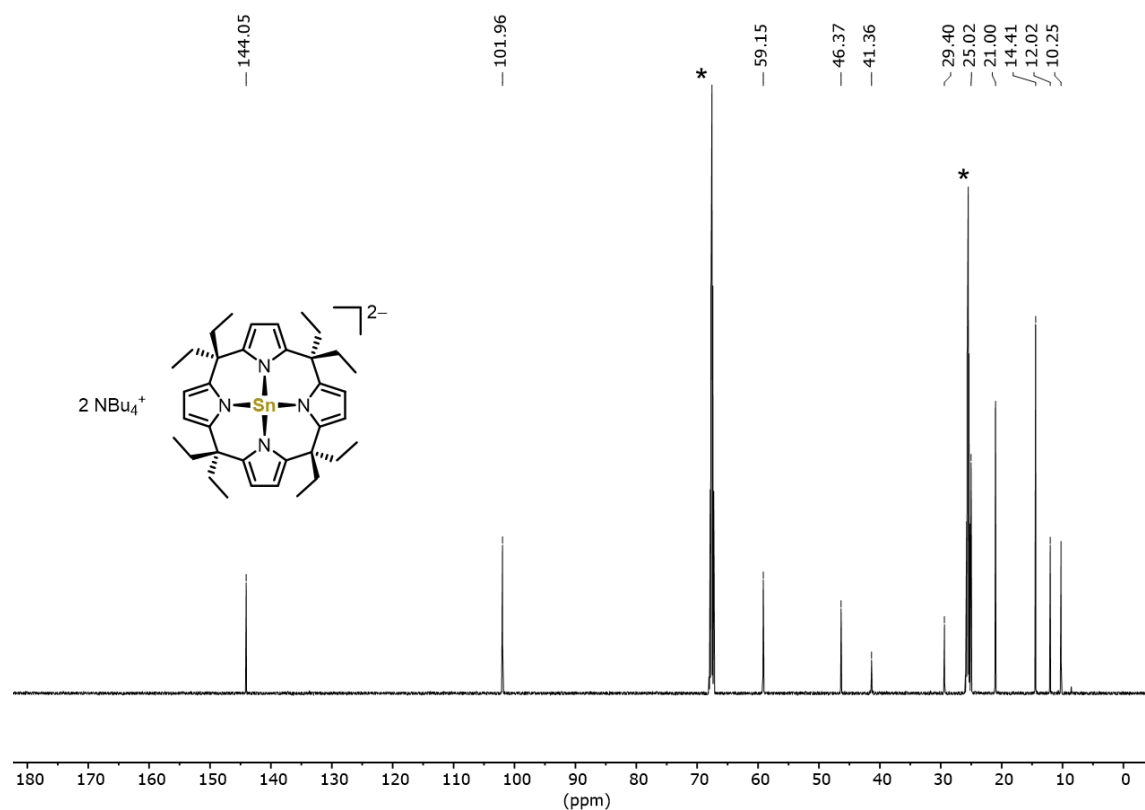

**Figure S9.**  $^{13}\text{C}$  NMR spectrum of  $[(\text{NBu}_4)_2][\mathbf{2}]$  (150.92 MHz,  $\text{THF-}d_8$ , 295 K). Solvent resonances are indicated by an asterisk (\*).

#### 4.3 $[(\text{PPh}_4)_2(\text{oDFB})_{0.5}][\mathbf{2}]$

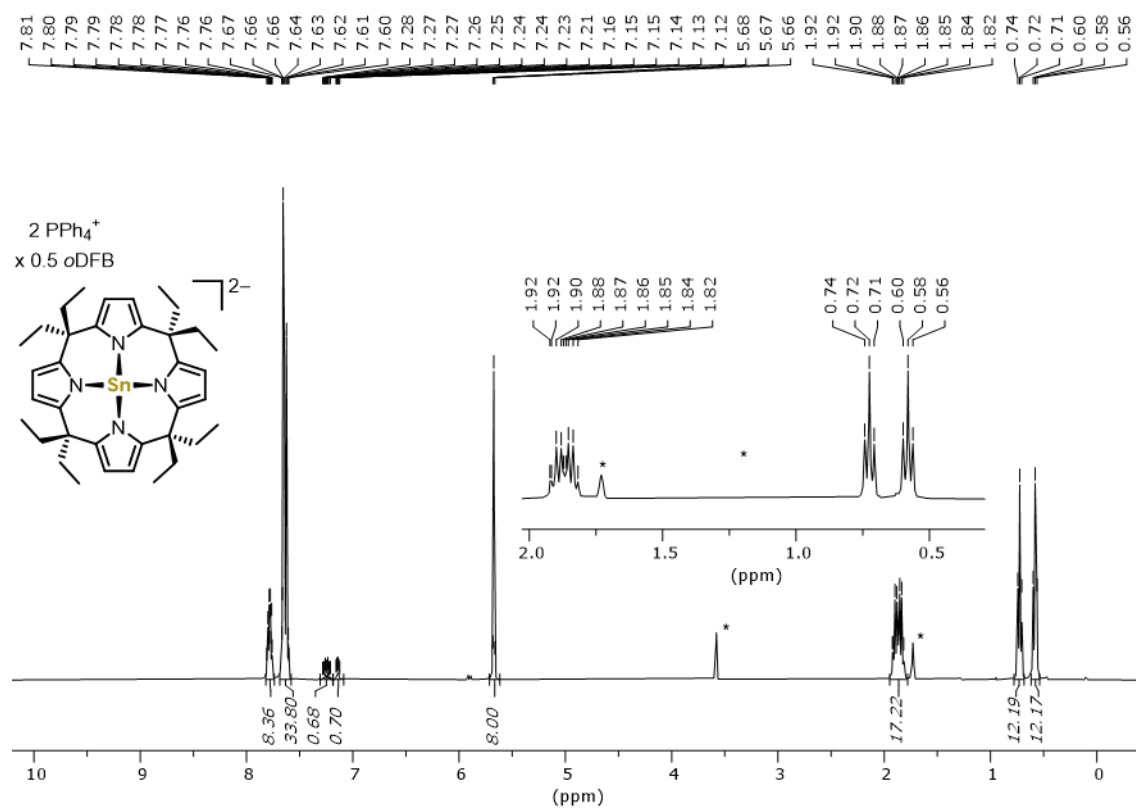

**Figure S10.**  $^1\text{H}$  NMR spectrum of  $[(\text{PPh}_4)_2(\text{oDFB})_{0.5}][\mathbf{2}]$  (399.89 MHz,  $\text{THF-}d_8/\text{CD}_3\text{CN}$ , 295 K). Solvent resonances are indicated by an asterisk (\*).

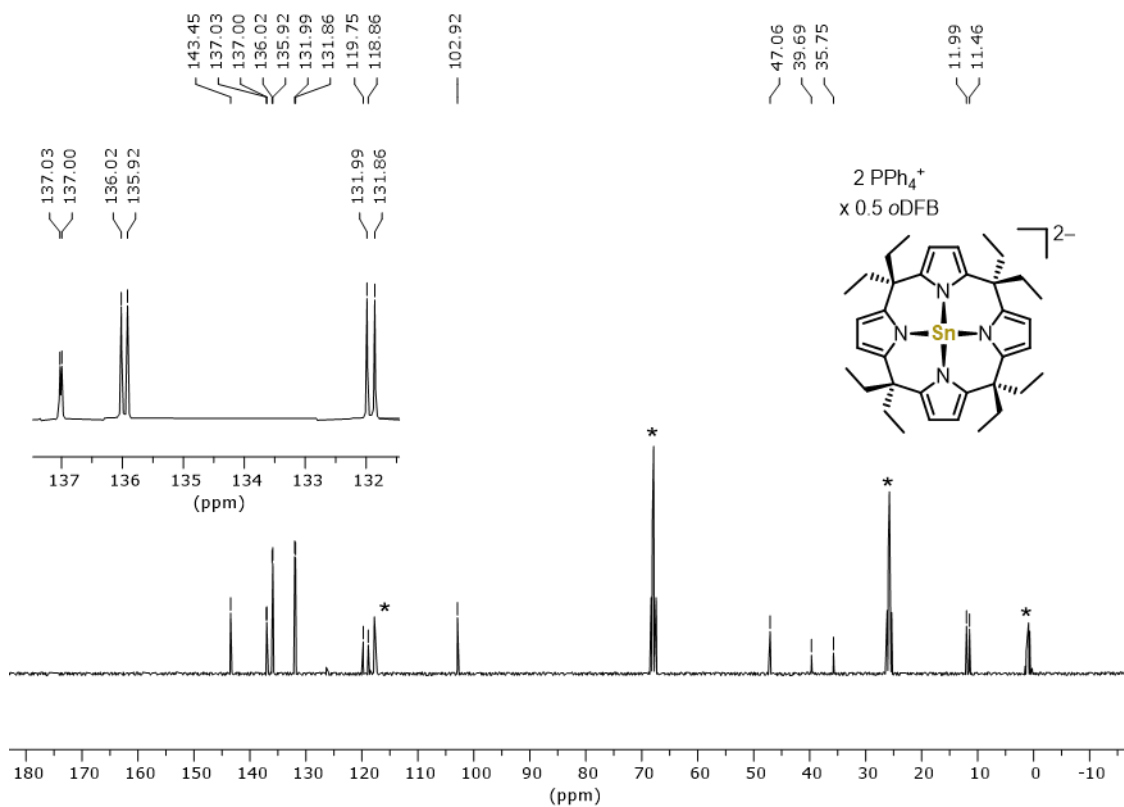

**Figure S11.**  $^{13}\text{C}$  NMR spectrum of  $[(\text{PPh}_4)_2(\text{oDFB})_{0.5}][2]$  (100.55 MHz,  $\text{THF-}d_8/\text{CD}_3\text{CN}$ , 295 K). Solvent resonances are indicated by an asterisk (\*).

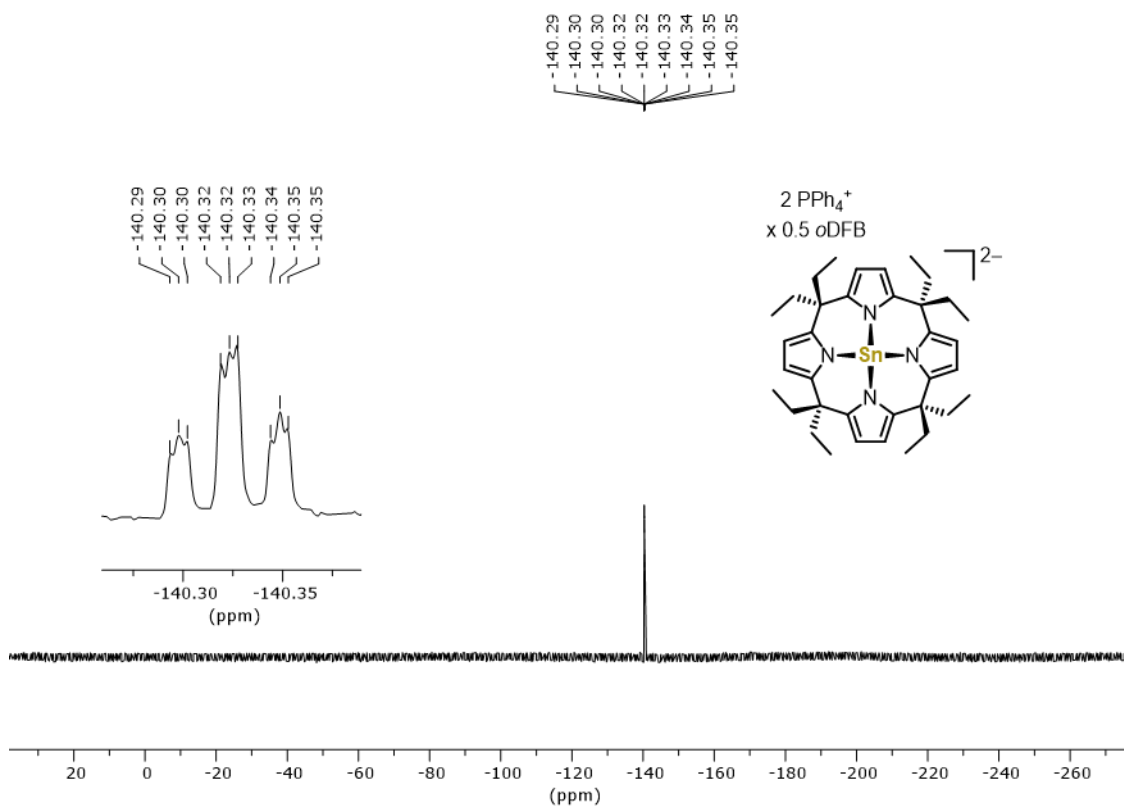

**Figure S12.**  $^{19}\text{F}$  NMR spectrum of  $[(\text{PPh}_4)_2(\text{oDFB})_{0.5}][2]$  (376.27 MHz,  $\text{THF-}d_8/\text{CD}_3\text{CN}$ , 295 K).

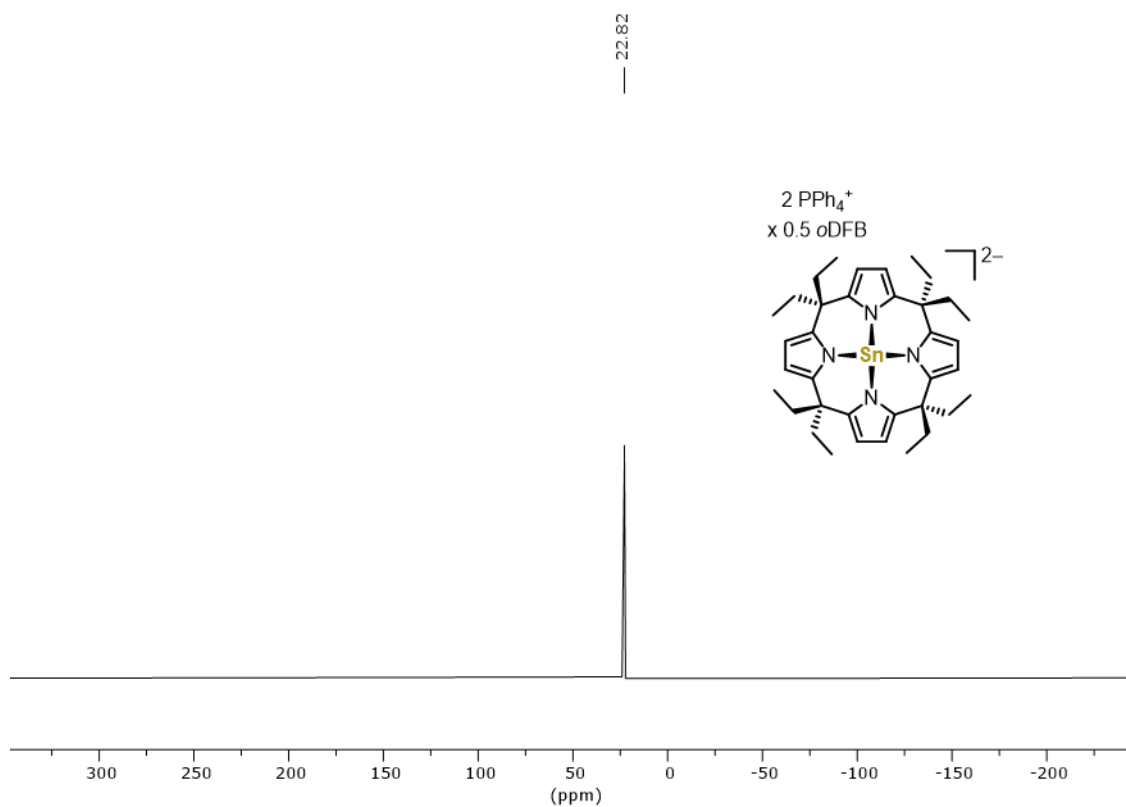

**Figure S13.**  $^{31}\text{P}\{^1\text{H}\}$  NMR spectrum of  $[(\text{PPh}_4)_2(\text{oDFB})_{0.5}][\mathbf{2}]$  (161.88 MHz,  $\text{THF-}d_8/\text{CD}_3\text{CN}$ , 295 K).

#### 4.4 $[\text{Li}_2(\text{thf})_x][\mathbf{2-}\text{Se}]$

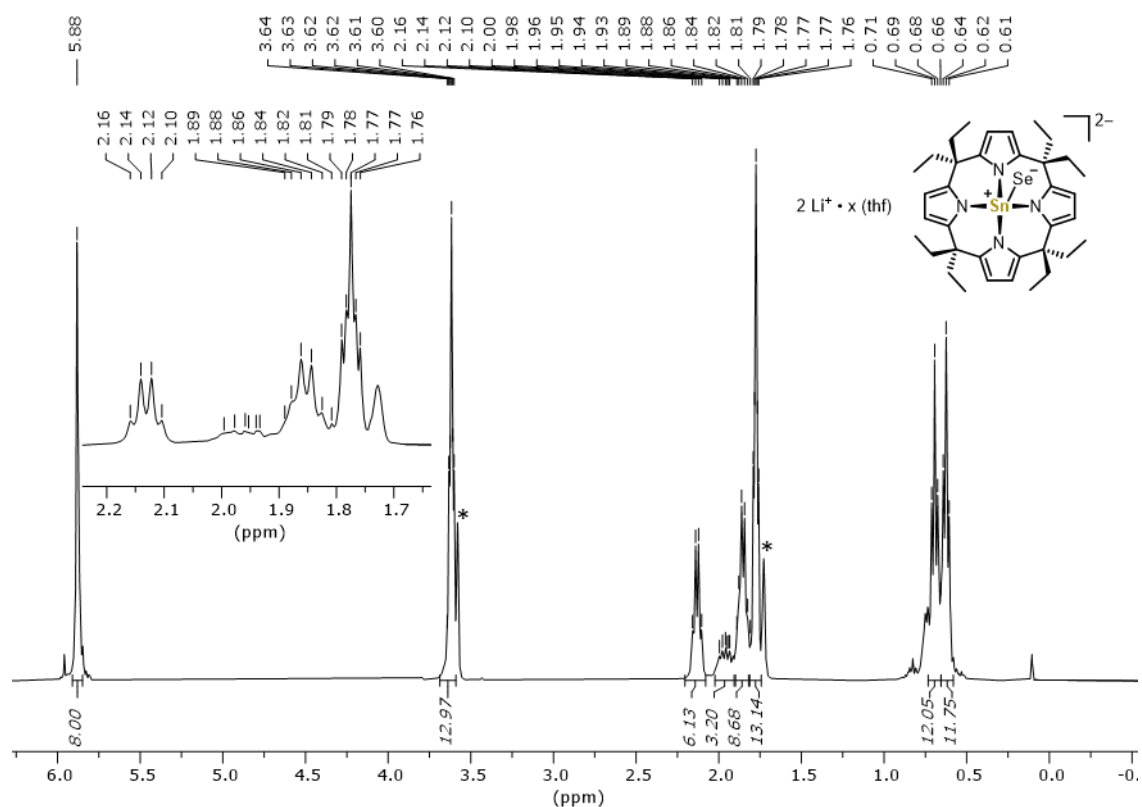

**Figure S14.**  $^1\text{H}$  NMR spectrum of  $[\text{Li}_2(\text{thf})_x][\mathbf{2-}\text{Se}]$  (399.89 MHz,  $\text{THF-}d_8$ , 295 K). Solvent resonances are indicated by an asterisk (\*).



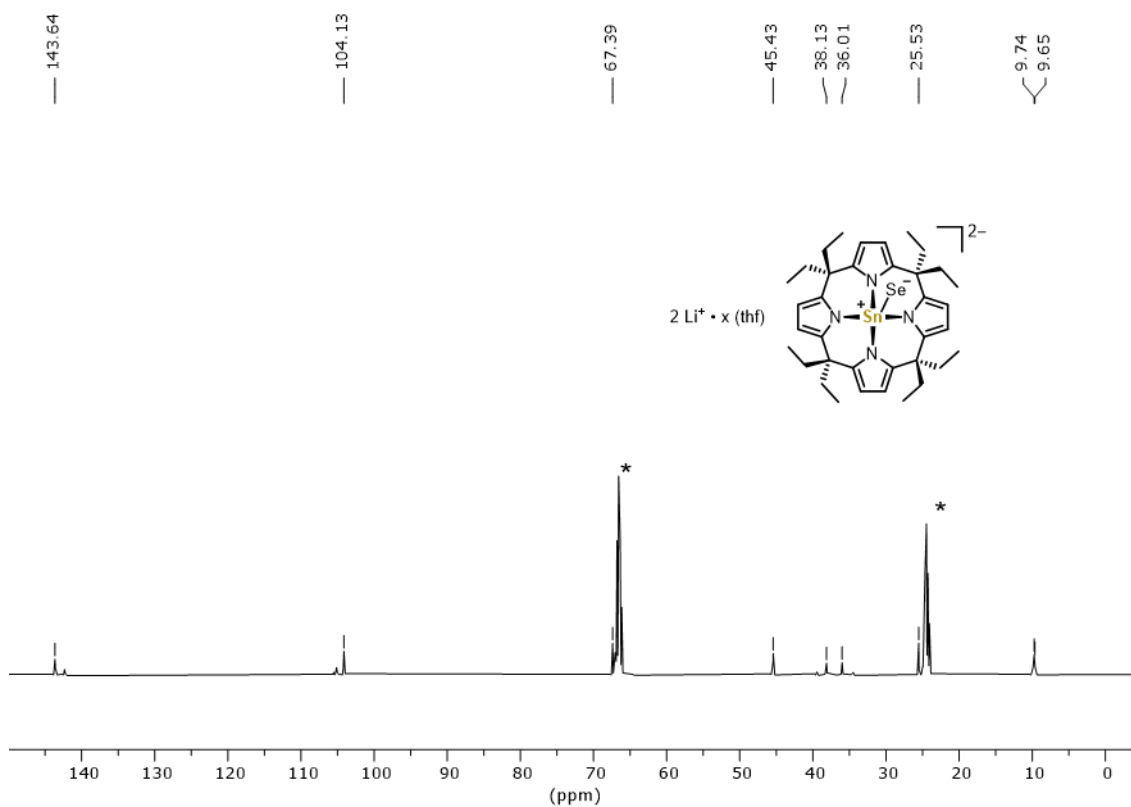

**Figure S15.**  $^{13}\text{C}$  NMR spectrum of  $[\text{Li}_2(\text{thf})_x][2\text{-Se}]$  (100.55 MHz, THF- $d_8$ , 295 K). Solvent resonances are indicated by an asterisk (\*).

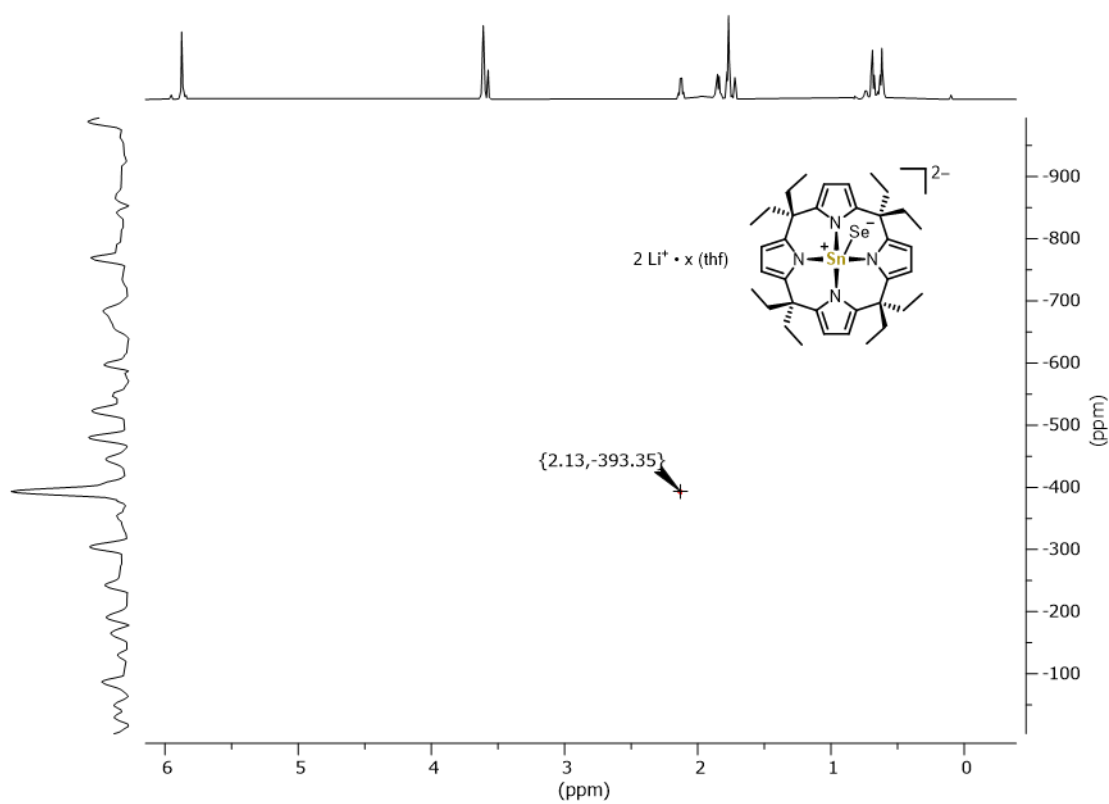

**Figure S16.**  $^{77}\text{Se}$ - $^1\text{H}$  HMBC NMR spectrum of  $[\text{Li}_2(\text{thf})_x][2]$  (THF- $d_8$ , 295 K).

#### 4.5 $[(PPh_4)_2][W(^2\eta\text{-}2)(CO)_5]$

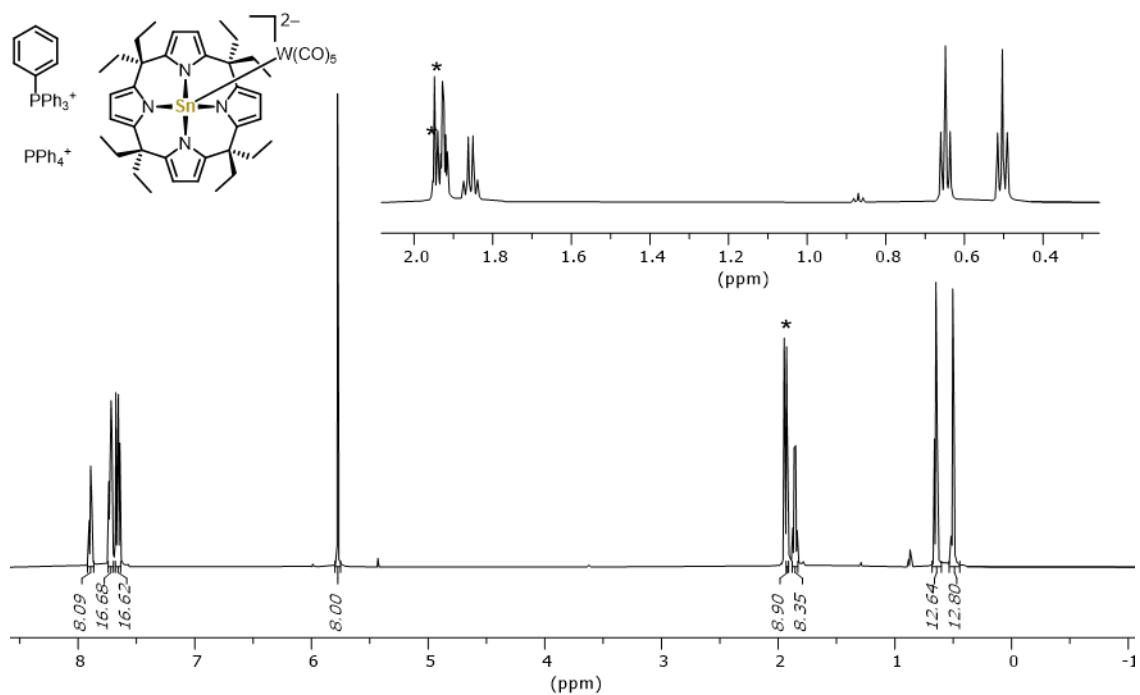

**Figure S17.**  $^1H$  NMR spectrum of  $[(PPh_4)_2][W(^1\eta\text{-}2)(CO)_5]$  (600.15 MHz,  $MeCN-d_3$ , 295 K). Solvent resonances are indicated by an asterisk (\*).

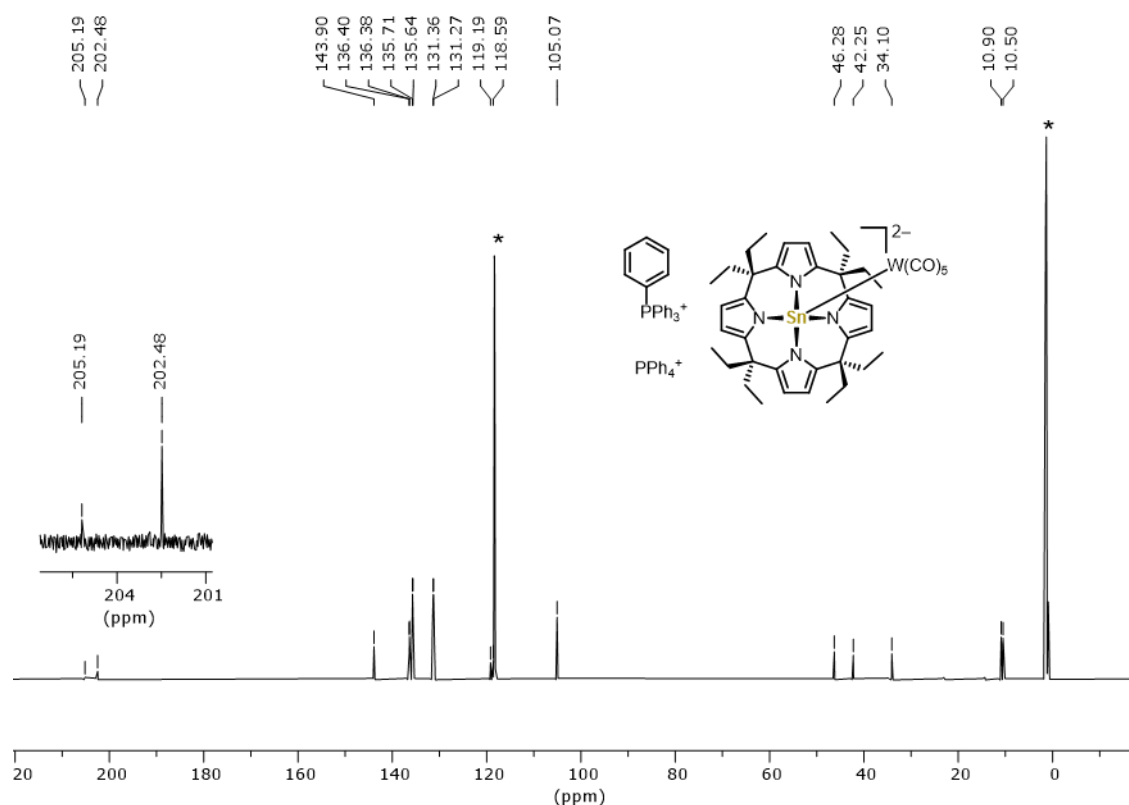

**Figure S18.**  $^{13}C$  NMR spectrum of  $[(PPh_4)_2][W(^1\eta\text{-}2)(CO)_5]$  (150.92 MHz,  $MeCN-d_3$ , 295 K). Solvent resonances are indicated by an asterisk (\*).

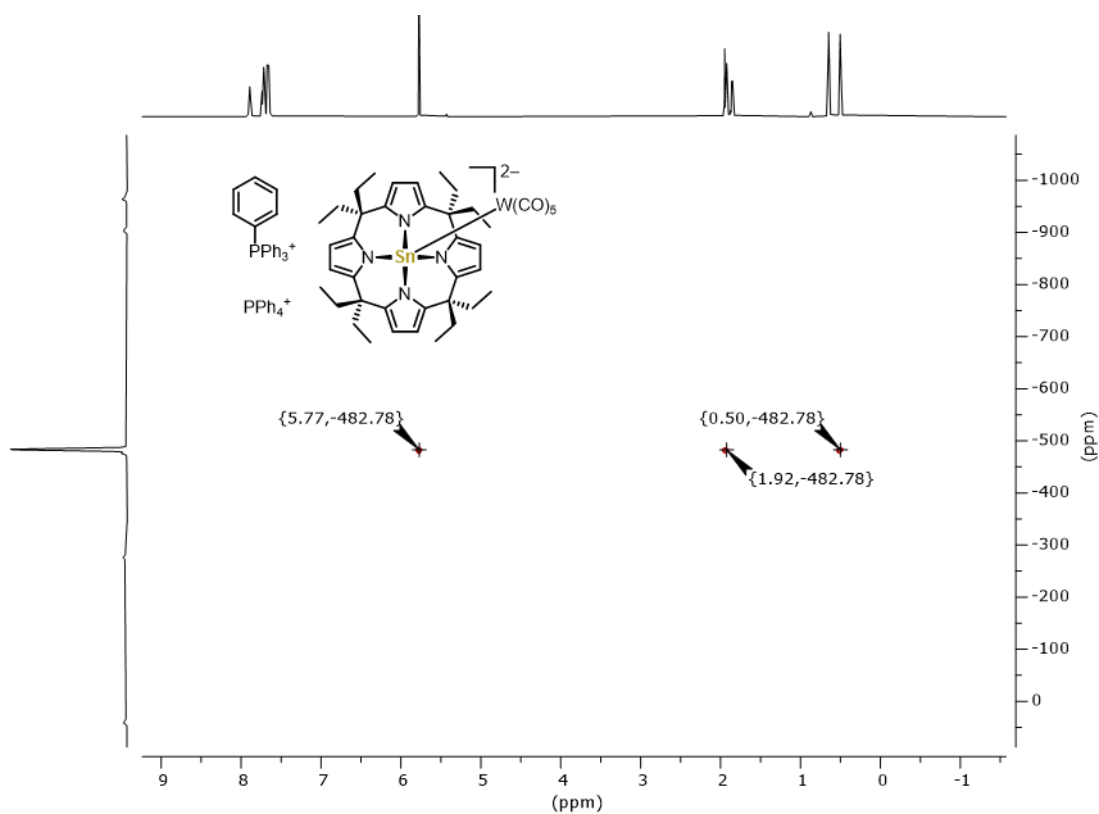

Figure S19.  $^{119}\text{Sn}$ - $^1\text{H}$  HMBC NMR spectrum of  $[(\text{PPh}_4)_2][\text{W}(\eta\text{-}2)(\text{CO})_5]$  ( $\text{MeCN-}d_3$ , 295 K).

#### 4.6 $[(\text{NBu}_4)_2][\text{Ni}(\eta\text{-}2)(\text{CO})_3]$

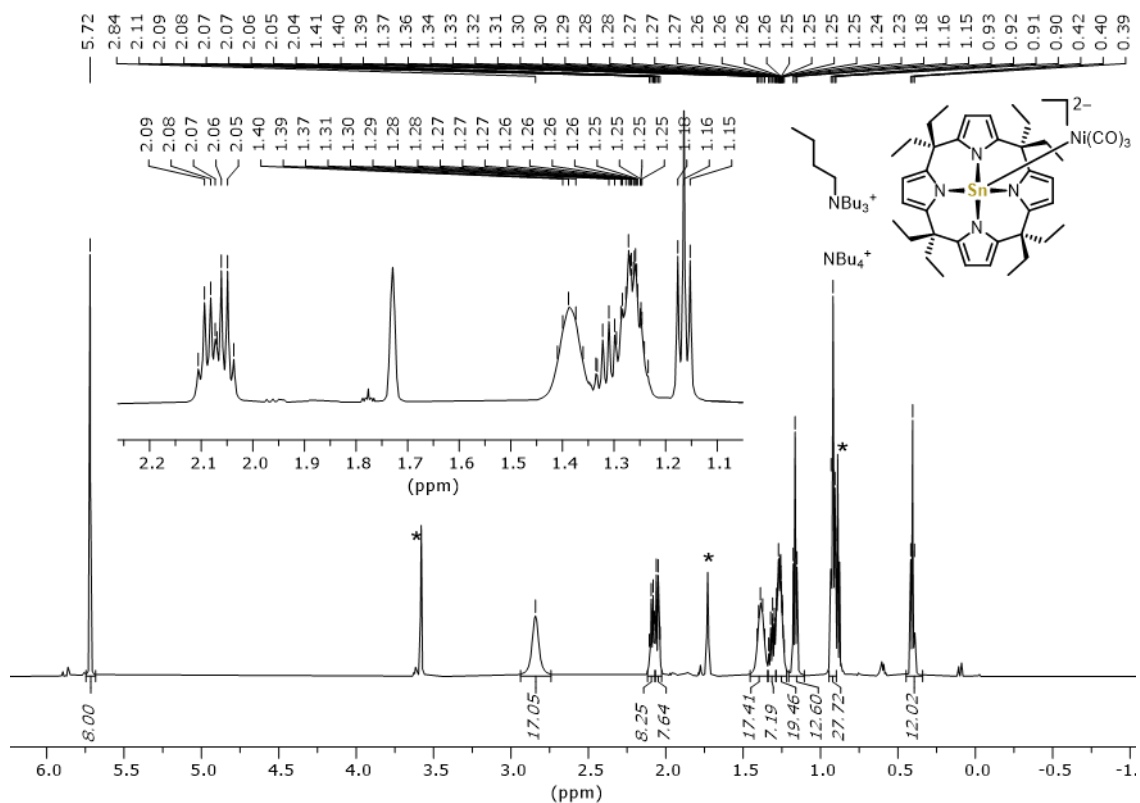

Figure S20.  $^1\text{H}$  NMR spectrum of  $[(\text{NBu}_4)_2][\text{Ni}(\eta\text{-}2)(\text{CO})_3]$  (600.15 MHz,  $\text{THF-}d_8$ , 295 K). Solvent resonances and resonances of residue pentane are indicated by an asterisk (\*).

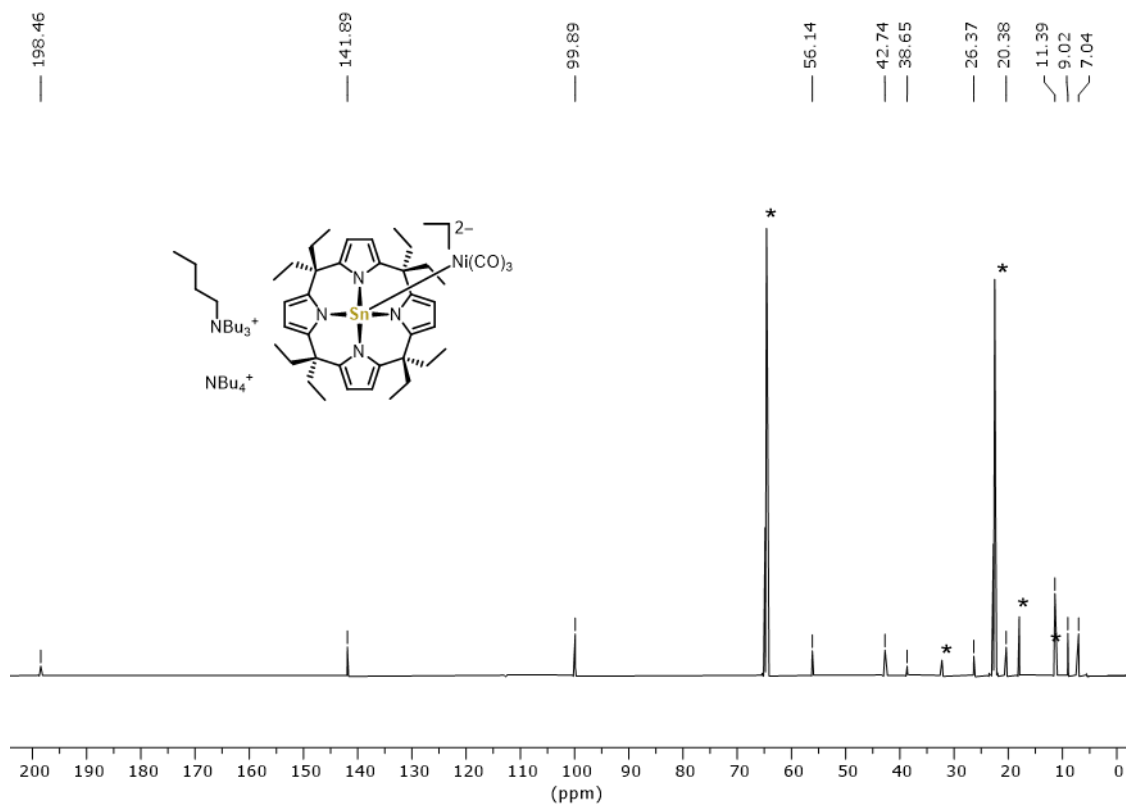

**Figure S21.**  $^{13}C$  NMR spectrum of  $[(NBu_4)_2][Ni(\eta^1\text{-}2)(CO)_3]$  (150.92 MHz, THF- $d_8$ , 295 K). Solvent resonances and resonances of residue pentane are indicated by an asterisk (\*).

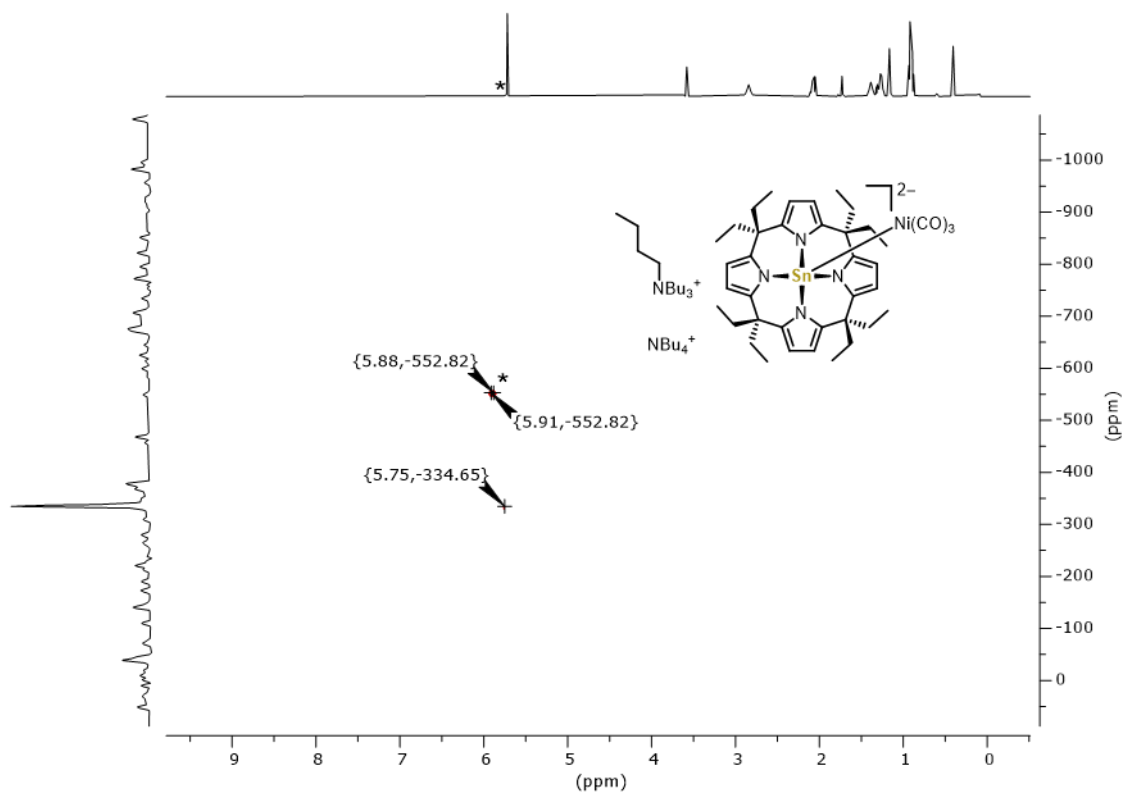

**Figure S22.**  $^{119}Sn$ - $^1H$  HMBC NMR spectrum of  $[(NBu_4)_2][Ni(\eta^1\text{-}2)(CO)_3]$  (THF- $d_8$ , 295 K). Traces of free stannate(II) dianion formed by decomposition are indicated by an asterisk (\*).

## 4.7 Ru( $\eta^5$ -2)(cymene)

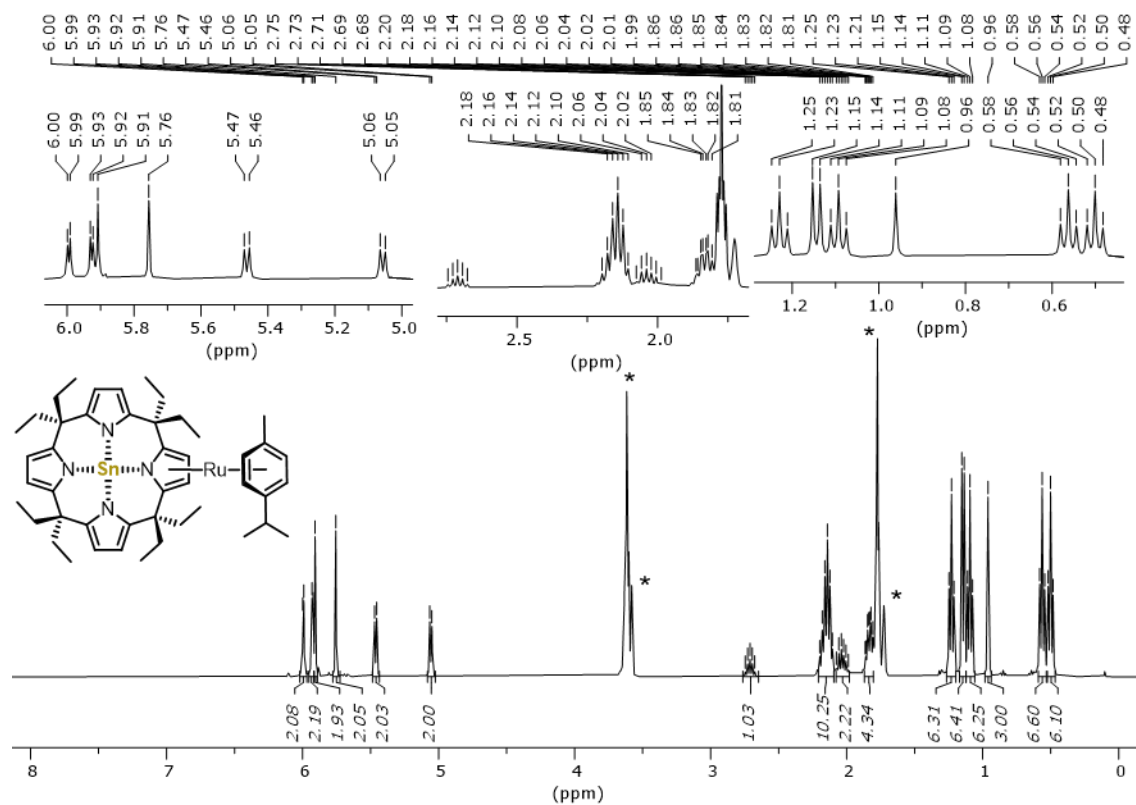

**Figure S23.**  $^1\text{H}$  NMR spectrum of **Ru( $\eta^5$ -2)(cymene)** (400 MHz,  $\text{THF-}d_8$ , 295 K). Solvent resonances and resonances of residue pentane are indicated by an asterisk (\*).

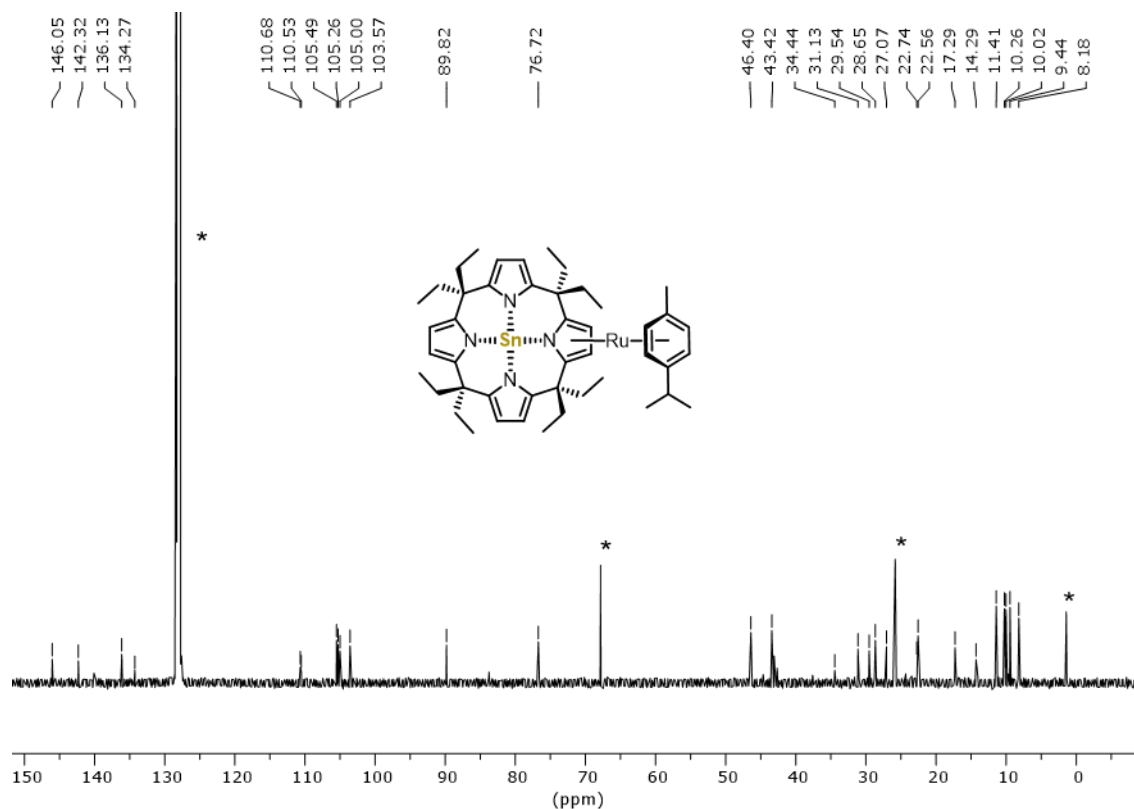

**Figure S24.**  $^{13}\text{C}$  NMR spectrum of **Ru( $\eta^5$ -2)(cymene)** (150.29 MHz,  $\text{C}_6\text{D}_6$ , 295 K). Solvent resonances and resonances of residue pentane are indicated by an asterisk (\*).

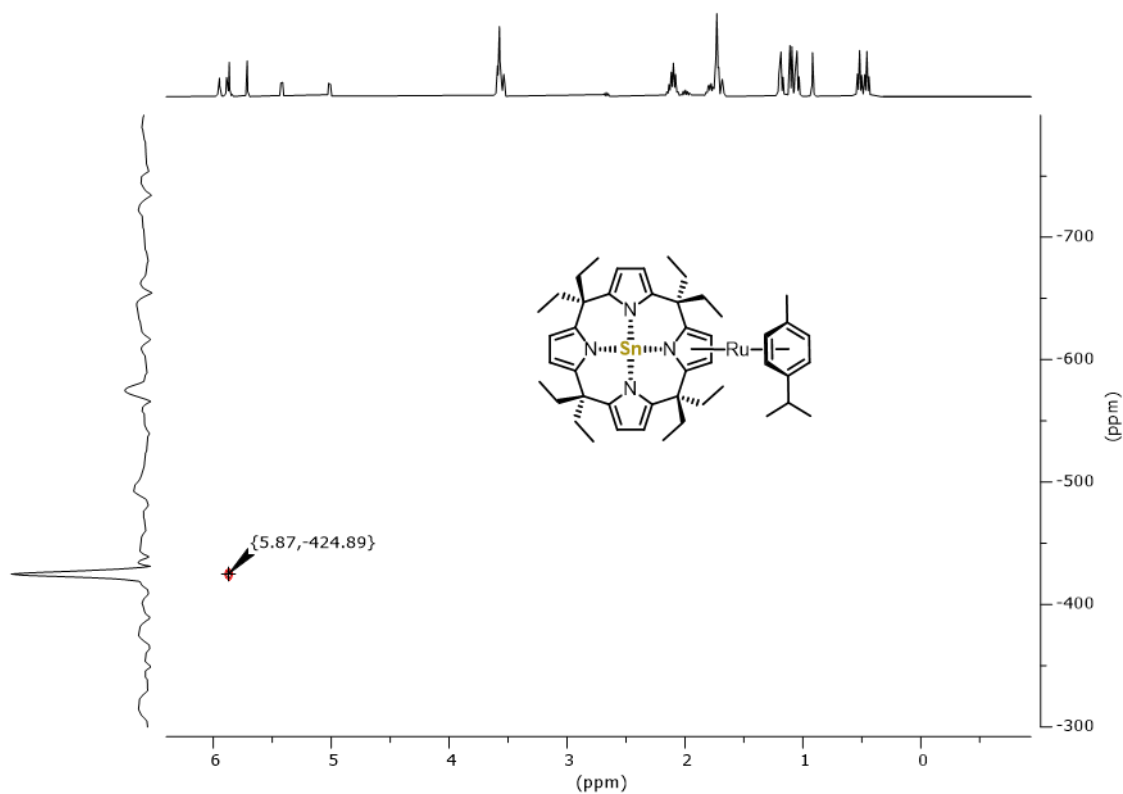

Figure S25.  $^{119}\text{Sn}$ - $^1\text{H}$  HMBC NMR spectrum of  $\text{Ru}(\eta^5\text{-}2)(\text{cymene})$  ( $\text{THF-}d_8$ , 295 K).

#### 4.8 Reaction of $[\text{Li}_2(\text{thf})_x][2]$ with Benzoyl chloride

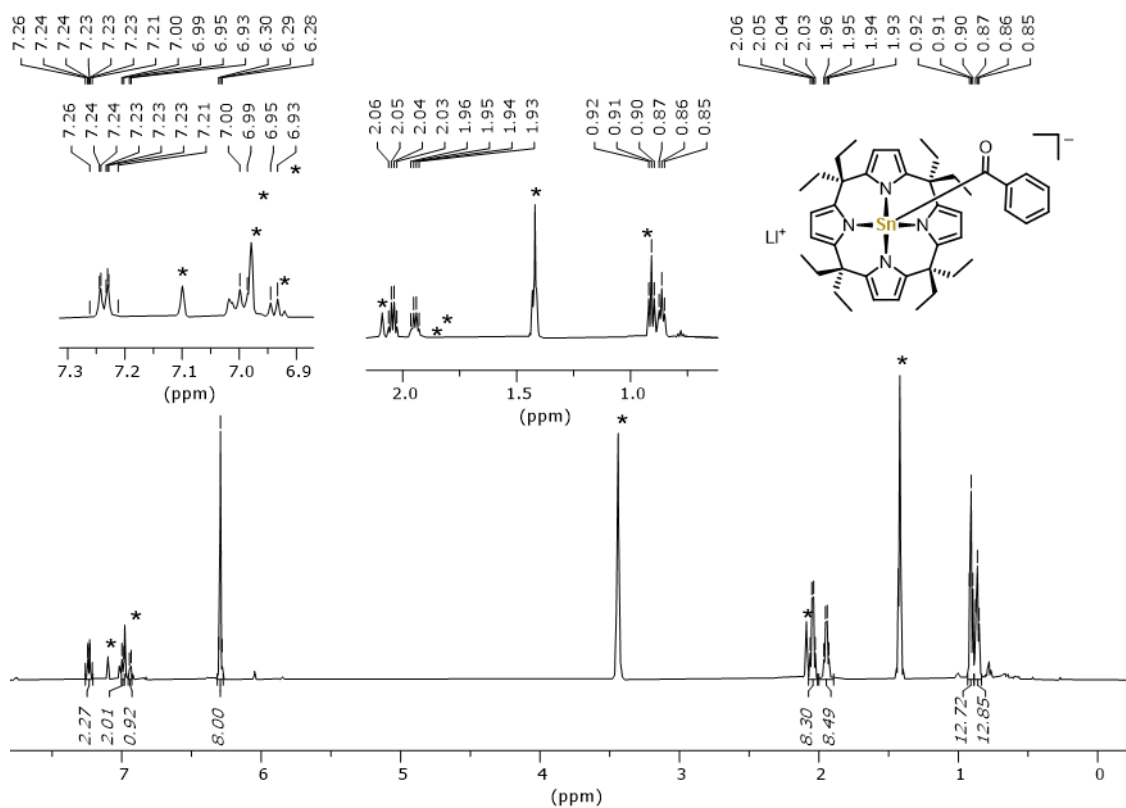

Figure S26.  $^1\text{H}$  NMR spectrum of the reaction of  $[\text{Li}_2(\text{thf})_x][2]$  with benzoyl chloride (600.15 MHz, Toluene- $d_8$ , 295 K). Solvent resonances and resonances of THF from starting material are indicated by an asterisk (\*).

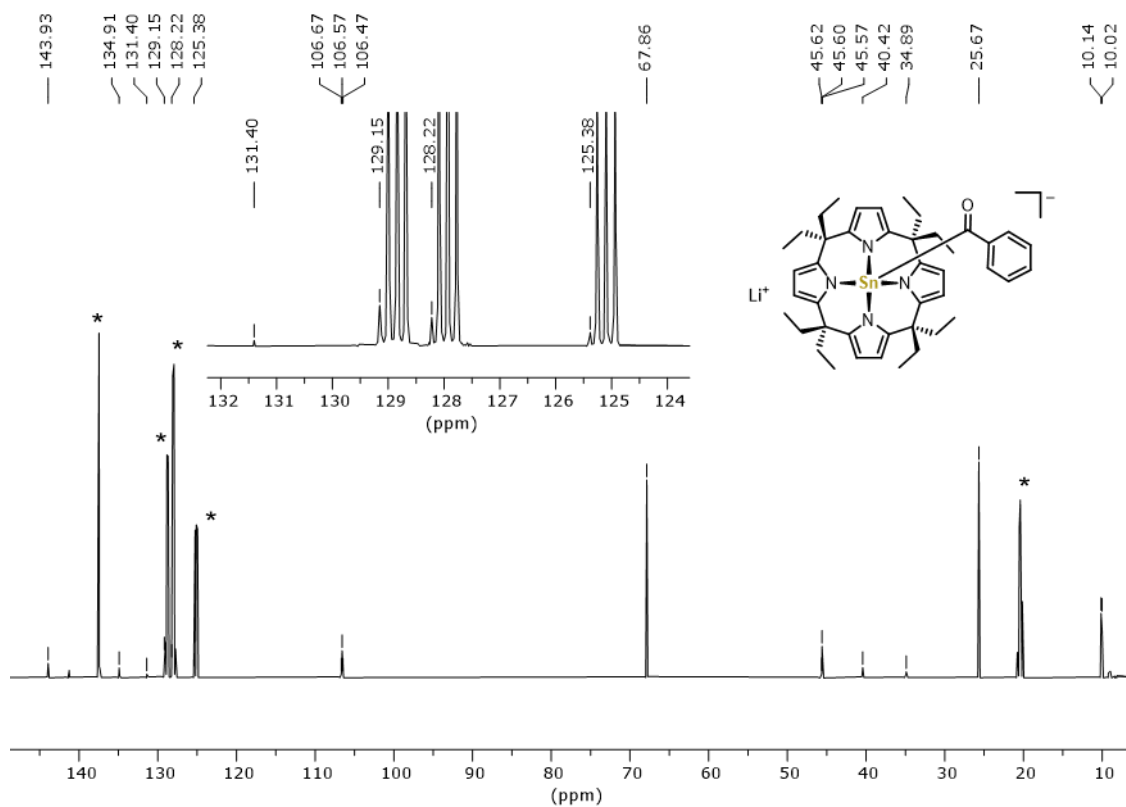

**Figure S27.**  $^{13}\text{C}$  NMR spectrum of the reaction of  $[\text{Li}_2(\text{thf})_x][\mathbf{2}]$  with benzoyl chloride (155.29 MHz, Toluene- $d_8$ , 295 K). Solvent resonances and resonances are indicated by an asterisk (\*).

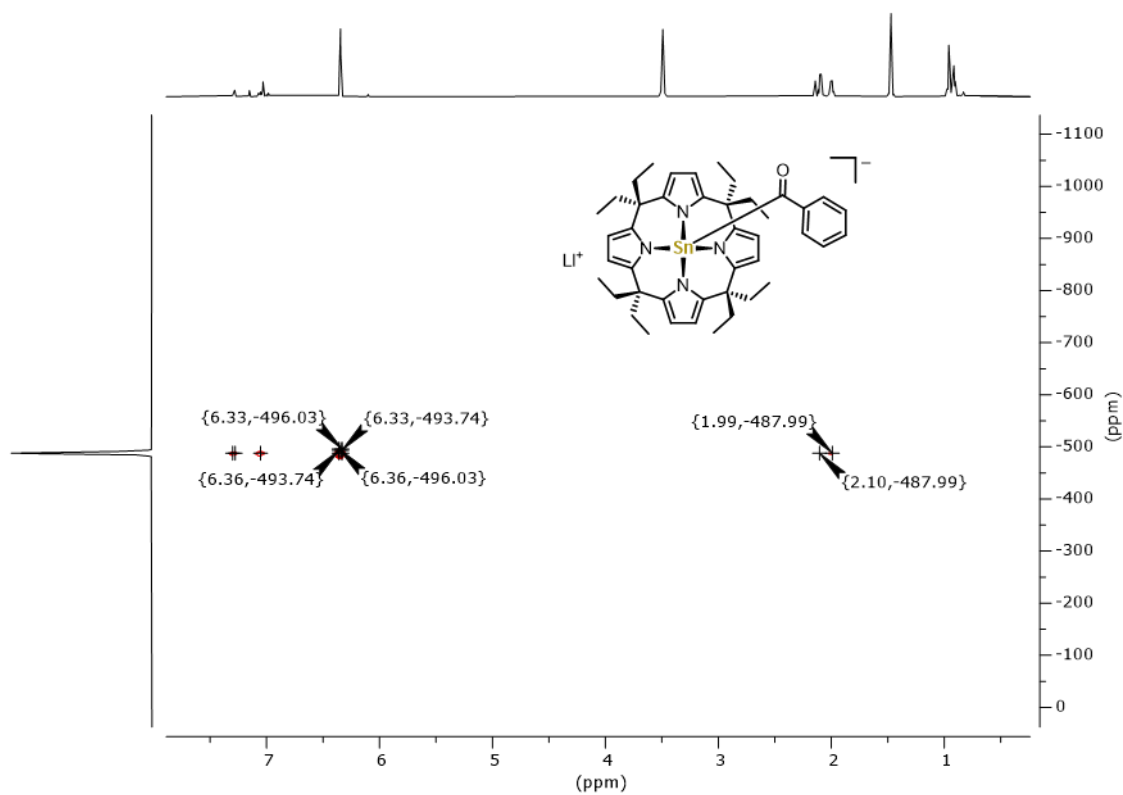

**Figure S28.**  $^{129}\text{Sn}$ - $^1\text{H}$  HMBC spectrum of the reaction of  $[\text{Li}_2(\text{thf})_x][\mathbf{2}]$  with benzoyl chloride (399.89 MHz, Toluene- $d_8$ , 295 K).

#### 4.9 Reaction of $[\text{Li}_2(\text{thf})_x][\mathbf{2}]$ with 4- $\text{CF}_3$ -Benzaldehyde

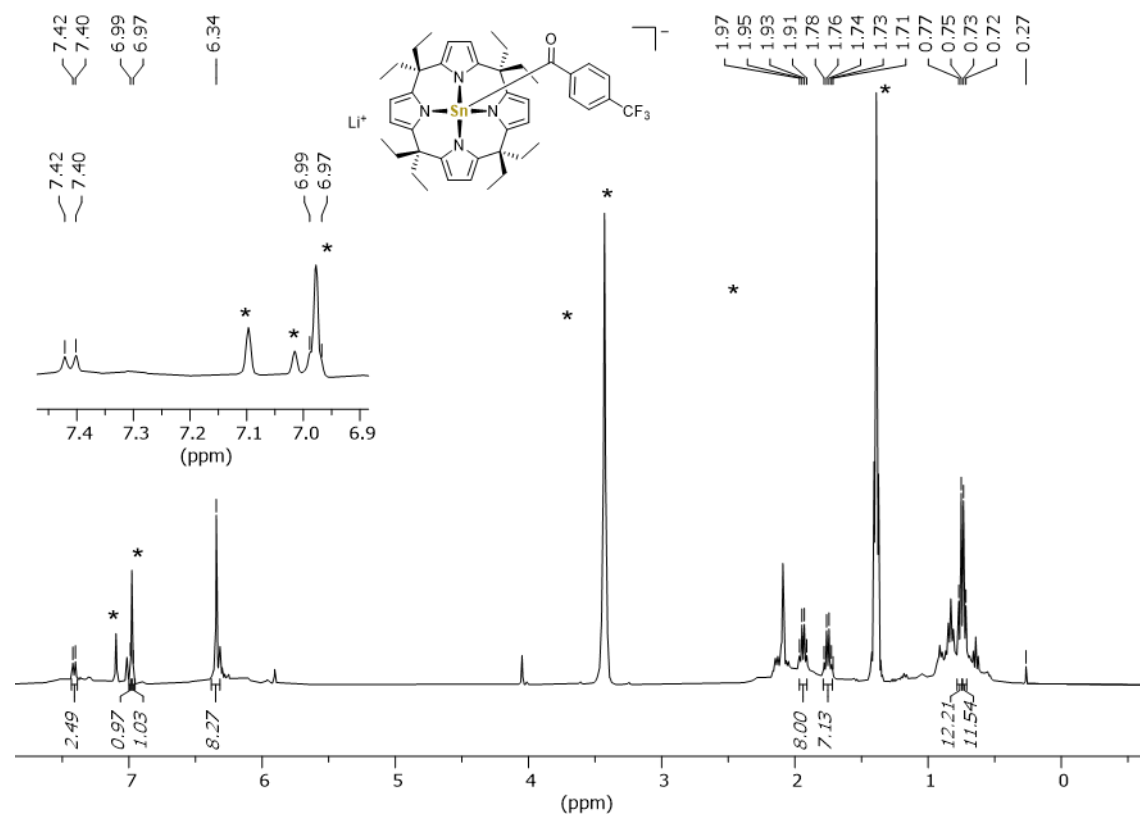

**Figure S29.**  $^1\text{H}$  NMR spectrum of the reaction of  $[\text{Li}_2(\text{thf})_x][\mathbf{2}]$  with 4- $\text{CF}_3$ -benzaldehyde (399.89 MHz, Toluene- $d_8$ , 295 K). Solvent resonances and resonances of THF from starting material are indicated by an asterisk (\*).

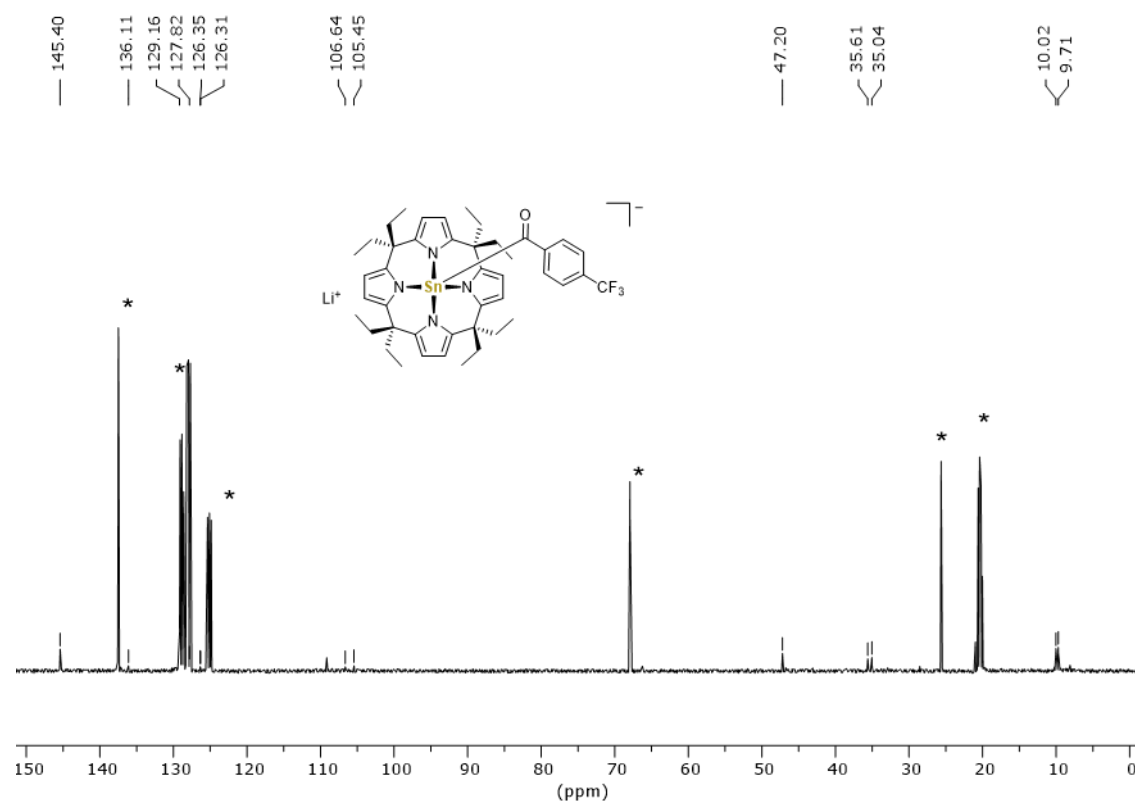

**Figure S30.**  $^{13}\text{C}$  NMR spectrum of the reaction of  $[\text{Li}_2(\text{thf})_x][\mathbf{2}]$  with 4- $\text{CF}_3$ -benzaldehyde (100.55 MHz, Toluene- $d_8$ , 295 K). Solvent resonances and resonances of THF from starting material are indicated by an asterisk (\*).



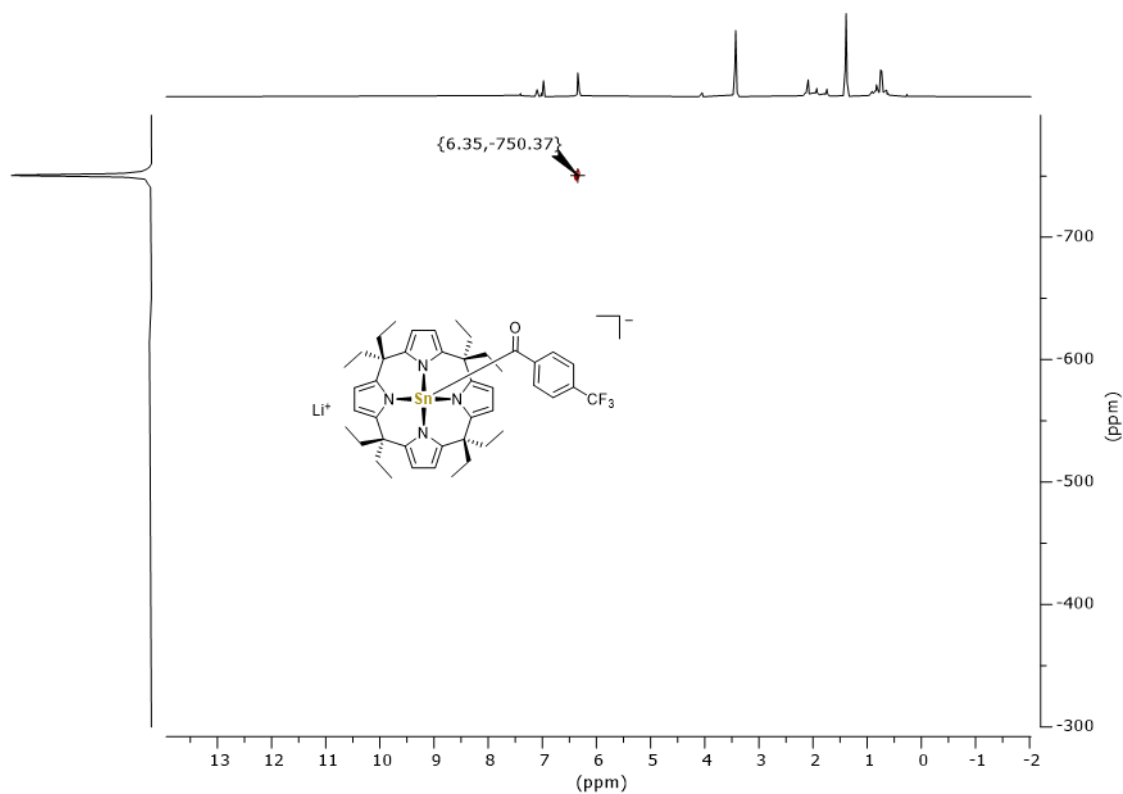

**Figure S31.**  $^{119}\text{Sn}$ - $^1\text{H}$  HMBC spectrum of the reaction of  $[\text{Li}_2(\text{thf})_x][\mathbf{2}]$  with 4-( $\text{CF}_3$ )-benzaldehyde (Toluene- $\text{d}_8$ , 295 K).

#### 4.10 Reaction of $[(\text{NBu}_4)_2][\mathbf{2}]$ with Methylene Chloride

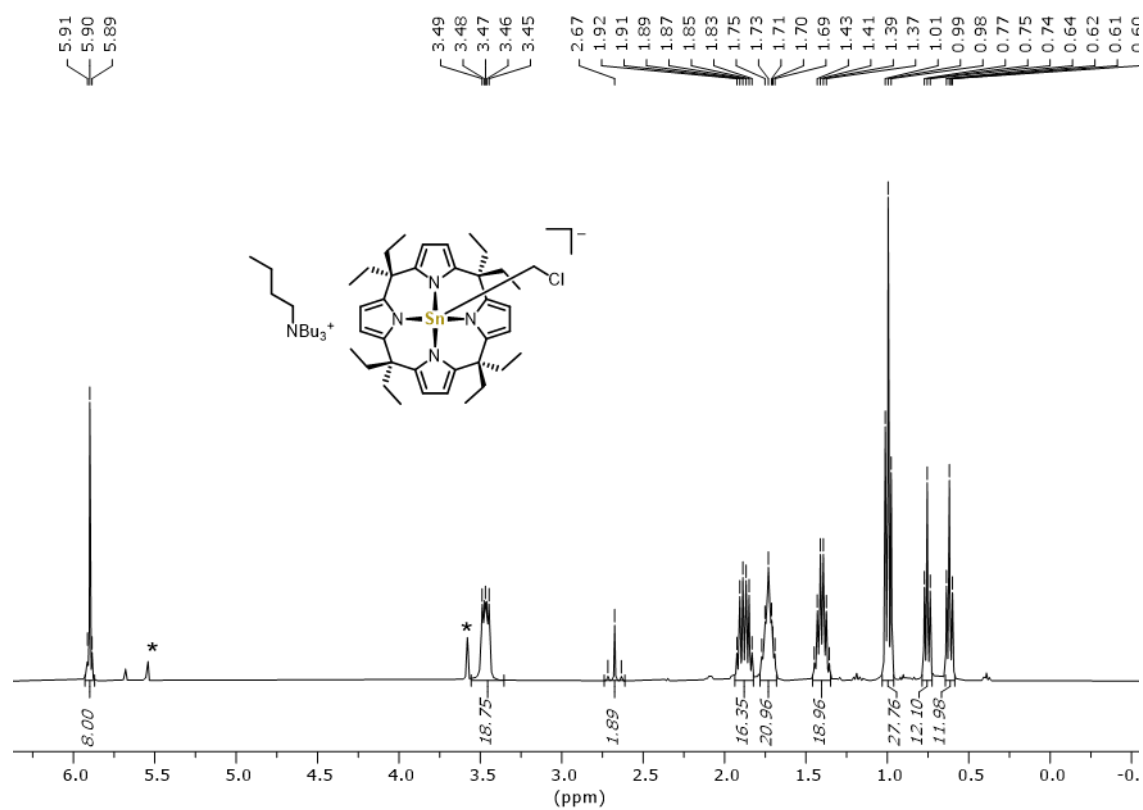

**Figure S32.**  $^1\text{H}$  NMR spectrum of the reaction of  $[(\text{NBu}_4)_2][\mathbf{2}]$  with methylene chloride (399.89 MHz,  $\text{THF-d}_8$ , 295 K). Solvent and residual methylene chloride resonances are indicated by an asterisk (\*).

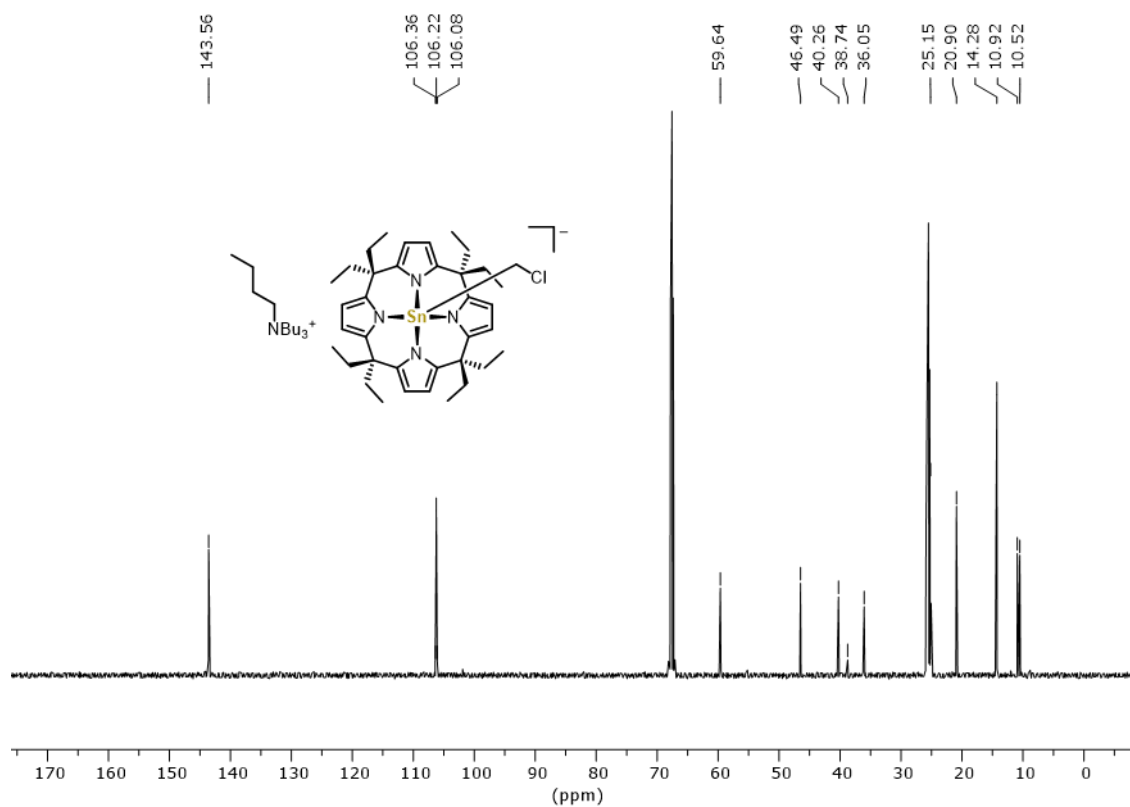

**Figure S33.**  $^{13}\text{C}$  NMR spectrum of the reaction of  $[(\text{NBu}_4)_2][\mathbf{2}]$  with methylene chloride (100.55 MHz,  $\text{THF-d}_8$ , 295 K). Solvent resonances are indicated by an asterisk (\*).

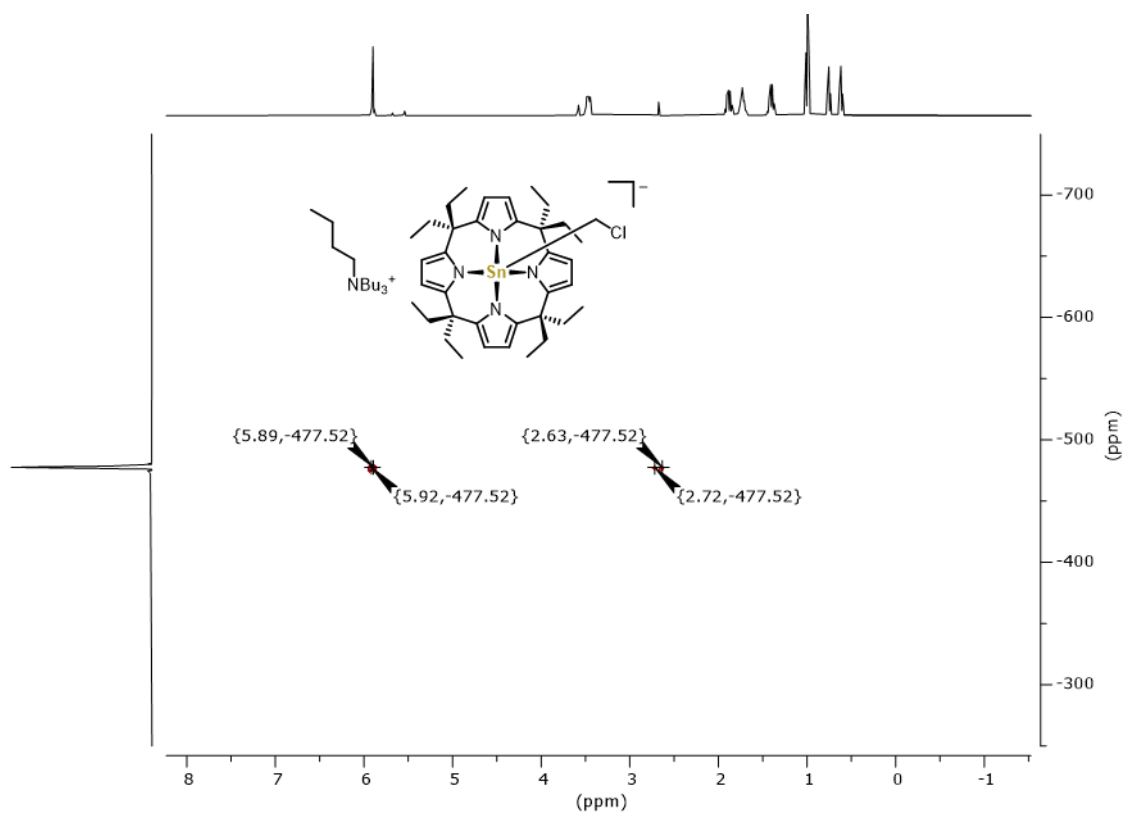

**Figure S34.**  $^{119}\text{Sn}$ - $^1\text{H}$  HMBC spectrum of the reaction of  $[(\text{NBu}_4)_2][\mathbf{2}]$  with methylene chloride ( $\text{THF-d}_8$ , 295 K).

#### 4.11 Reaction of $[(\text{NBu}_4)_2][\mathbf{2}]$ with Benzyl Chloride

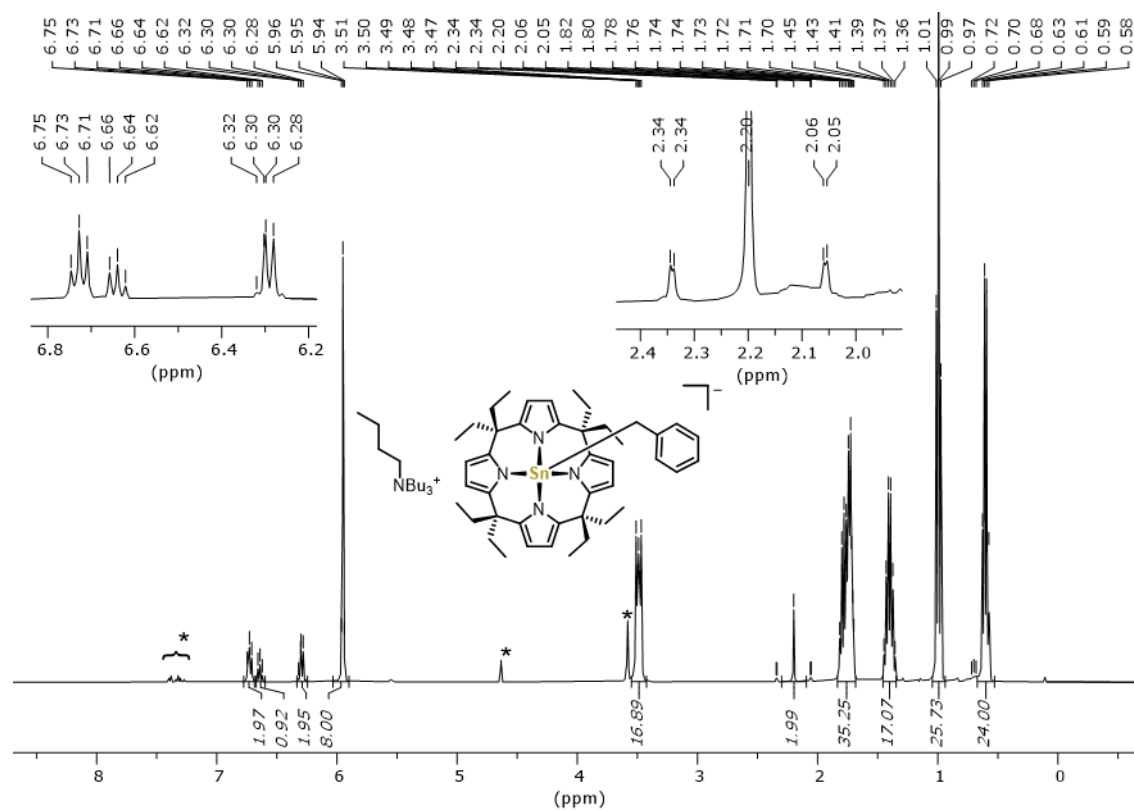

**Figure S35.**  $^1\text{H}$  NMR spectrum of the reaction of  $[(\text{NBu}_4)_2][\mathbf{2}]$  with benzyl chloride (399.89 MHz, THF-d<sub>8</sub>, 295 K). Solvent resonances are indicated by an asterisk (\*).

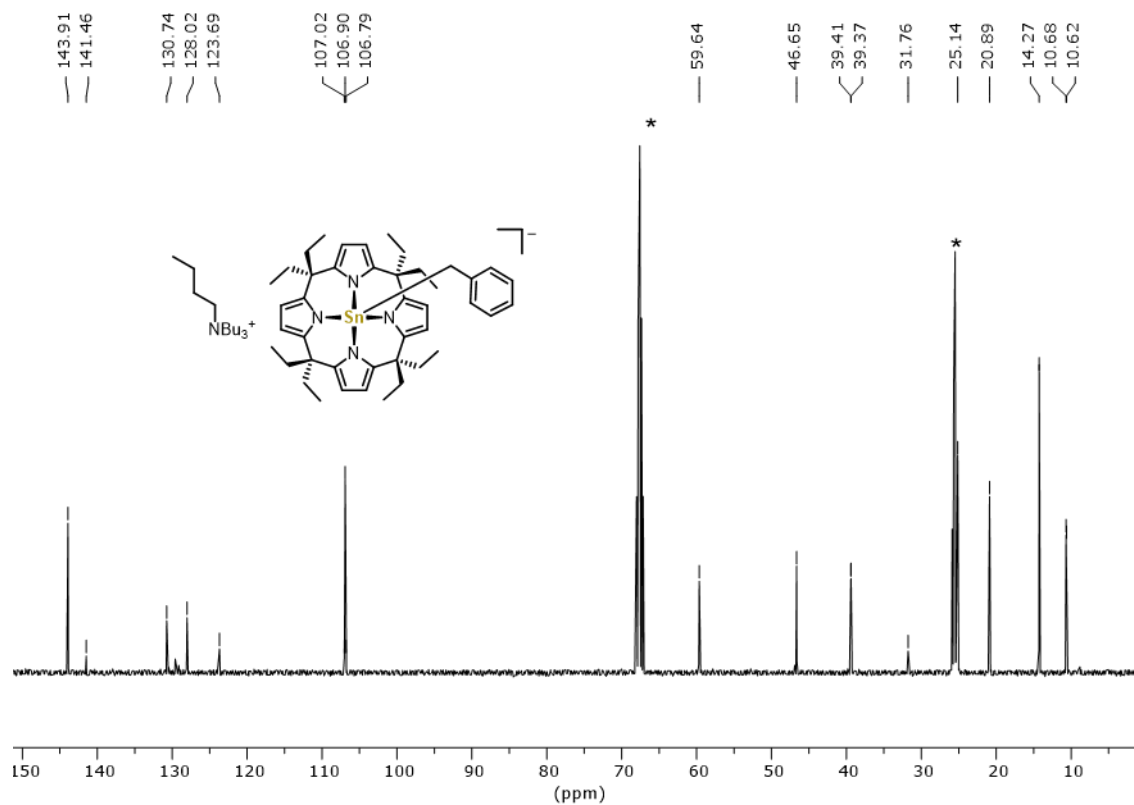

**Figure S36.**  $^{13}\text{C}$  NMR spectrum of the reaction of  $[(\text{NBu}_4)_2][\mathbf{2}]$  with benzyl chloride (100.55 MHz, THF-d<sub>8</sub>, 295 K). Solvent resonances are indicated by an asterisk (\*).

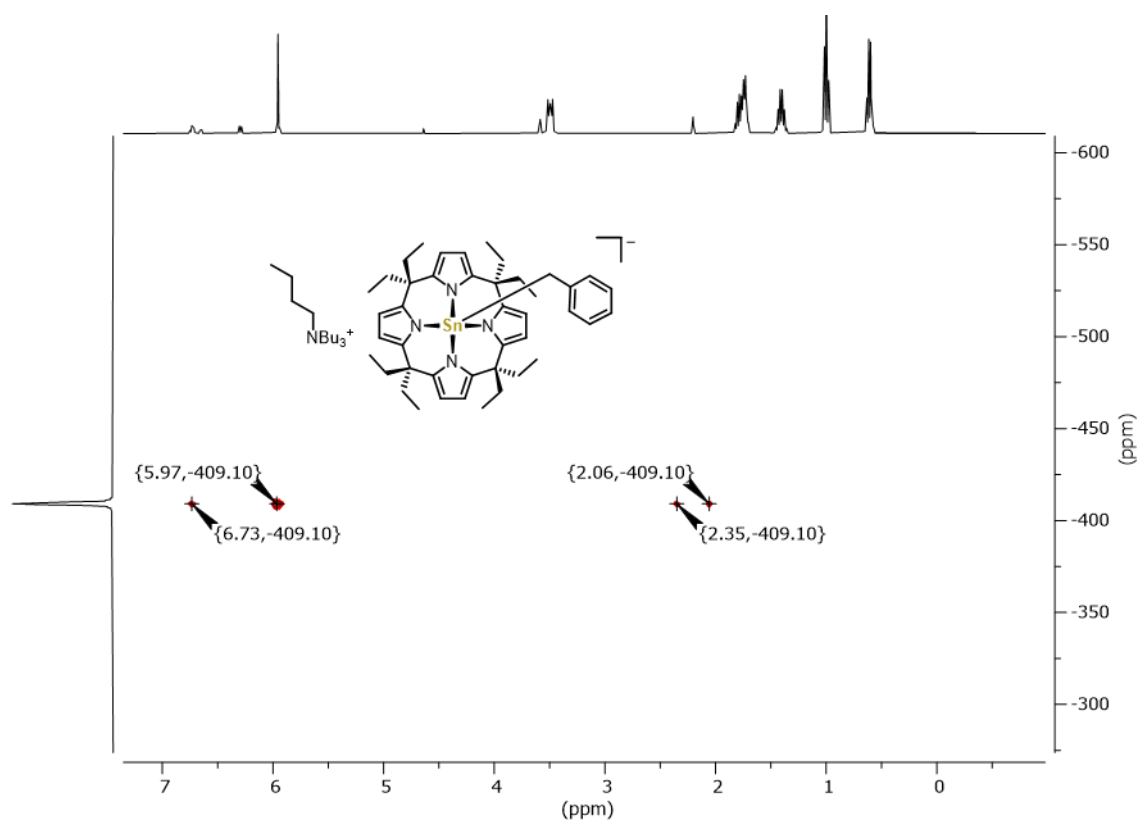

**Figure S37.**  $^{119}\text{Sn}$ - $^1\text{H}$  HMBC spectrum of the reaction of  $[(\text{NBu}_4)_2][\mathbf{2}]$  with benzyl chloride (THF- $d_8$ , 295 K).

#### 4.12 Reaction of $[(\text{NBu}_4)_2][\mathbf{2}]$ with Benzoyl Chloride

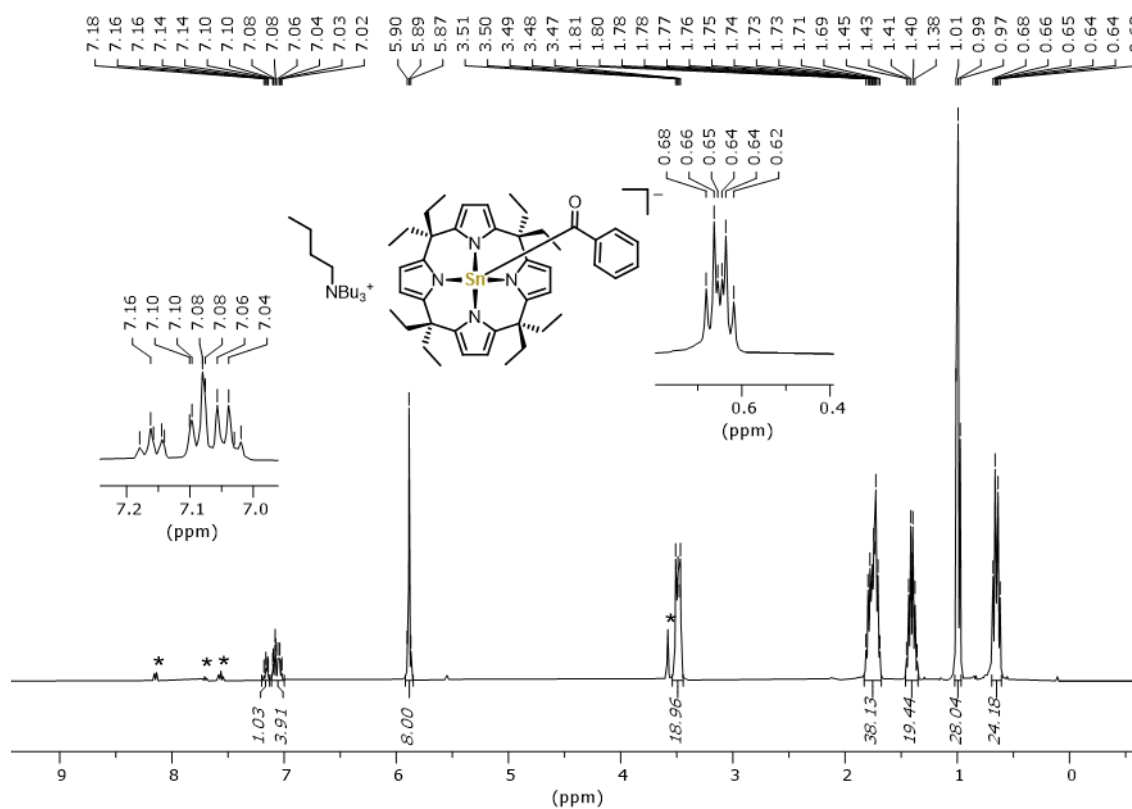

**Figure S38.**  $^1\text{H}$  NMR spectrum of the reaction of  $[(\text{NBu}_4)_2][\mathbf{2}]$  with benzoyl chloride (399.89 MHz, THF- $d_8$ , 295 K). Solvent and residue benzoyl chloride (slight excess) resonances are indicated by an asterisk (\*).

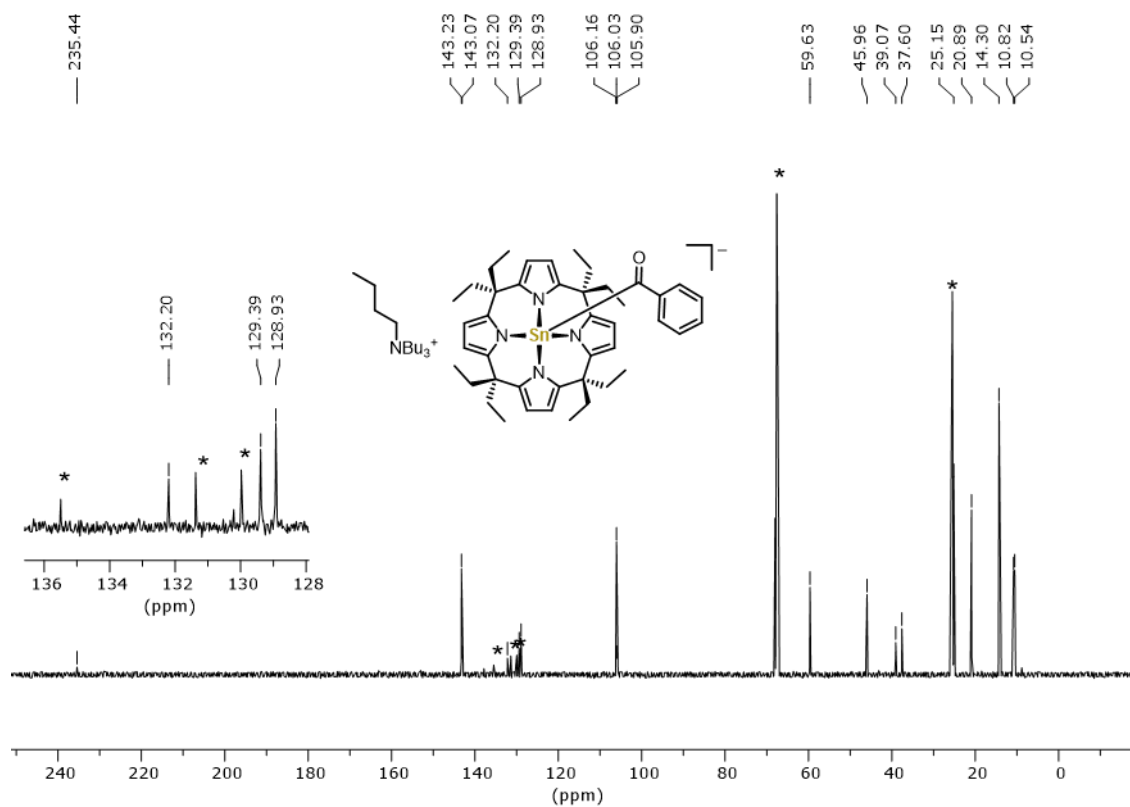

**Figure S39.**  $^{13}\text{C}$  NMR spectrum of the reaction of  $[(\text{NBu}_4)_2][\mathbf{2}]$  with benzoyl chloride (100.55 MHz, THF-d<sub>8</sub>, 295 K). Solvent and residue benzoyl chloride (slight excess) resonances are indicated by an asterisk (\*).

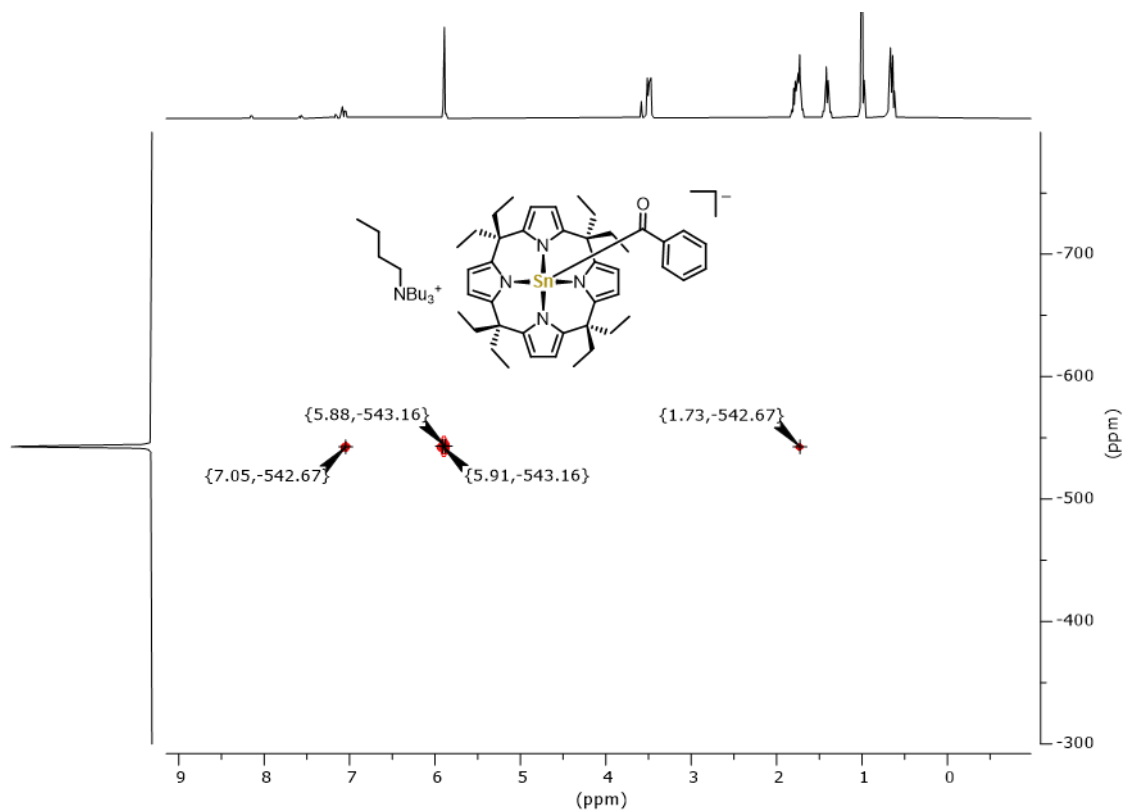

**Figure S40.**  $^{119}\text{Sn}$ - $^1\text{H}$  HMBC spectrum of the reaction of  $[(\text{NBu}_4)_2][\mathbf{2}]$  with benzoyl chloride (THF-d<sub>8</sub>, 295 K).

### 4.13 Reaction of $[(\text{NBu}_4)_2][2]$ with Iodobenzene

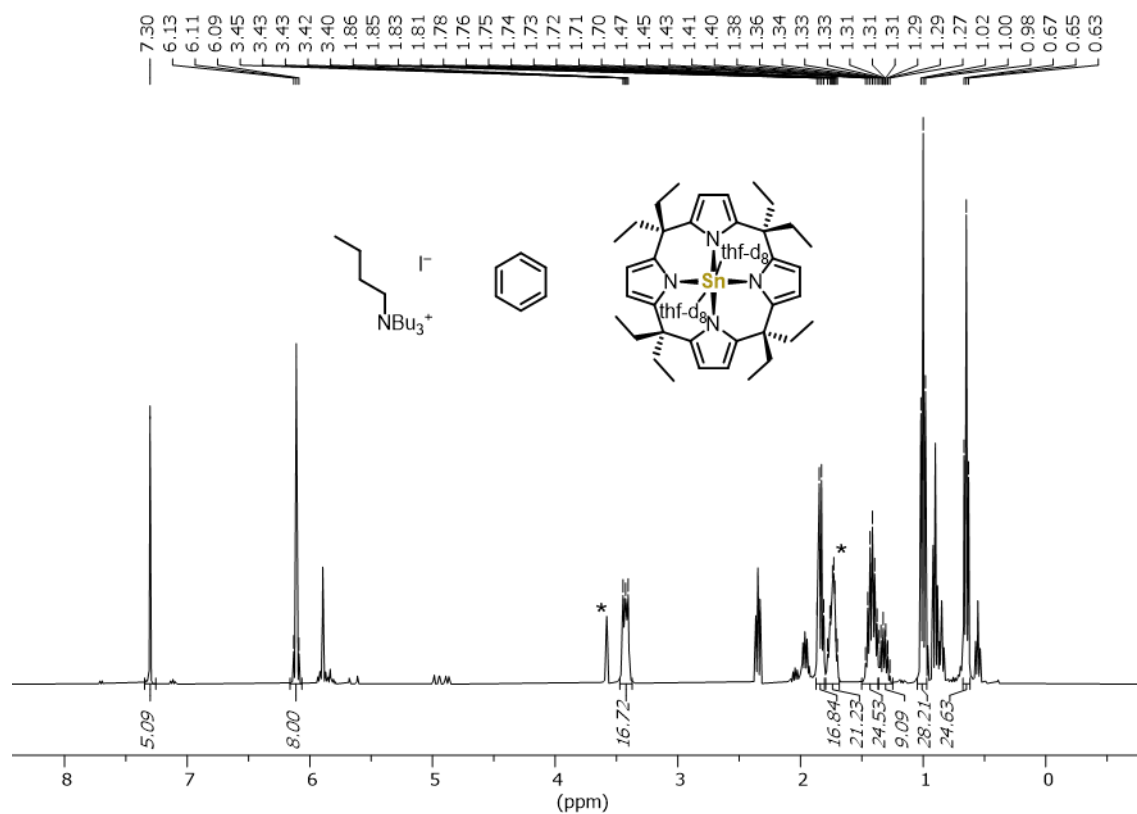

**Figure S41.**  $^1\text{H}$  NMR spectrum of the reaction of  $[(\text{NBu}_4)_2][2]$  with iodobenzene (399.89 MHz, THF- $d_8$ , 295 K). Solvent resonances are indicated by an asterisk (\*).

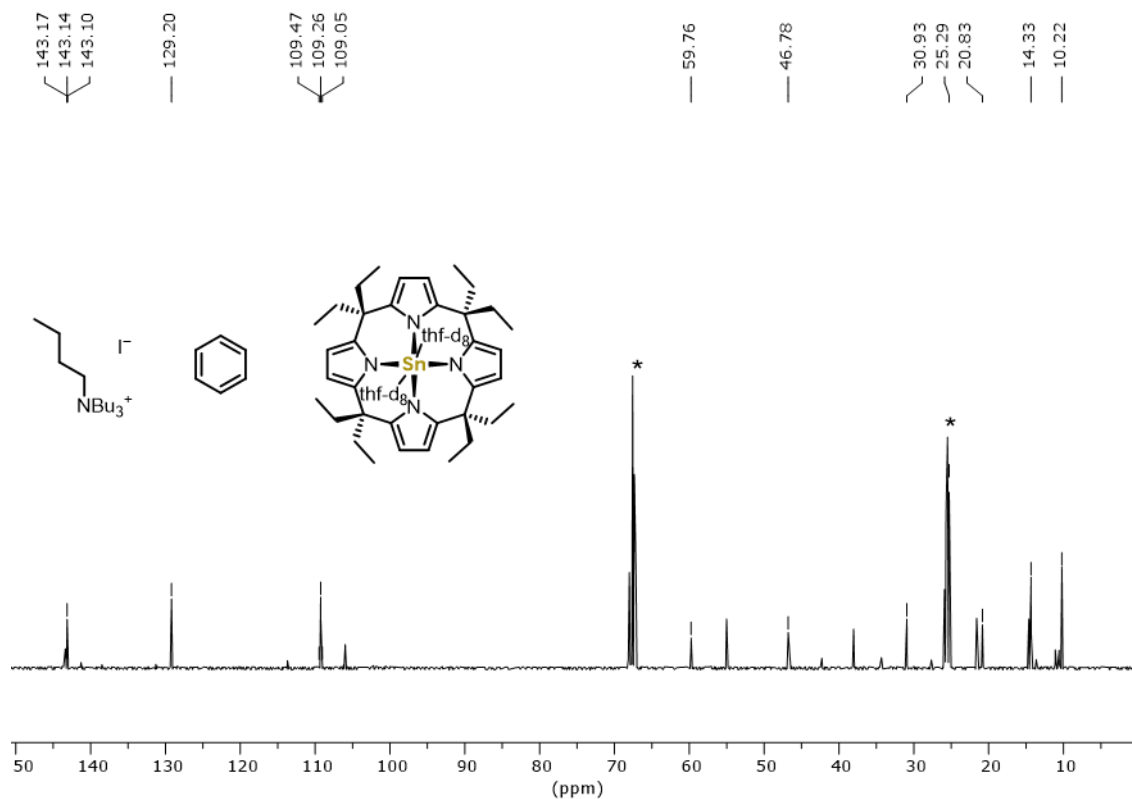

**Figure S42.**  $^{13}\text{C}$  NMR spectrum of the reaction of  $[(\text{NBu}_4)_2][2]$  with iodobenzene (100.55 MHz, THF- $d_8$ , 295 K). Solvent resonances are indicated by an asterisk (\*).

## 5 Crystallographic Data

### 5.1 $[\text{Li}_2(\text{thf})_x][2]$

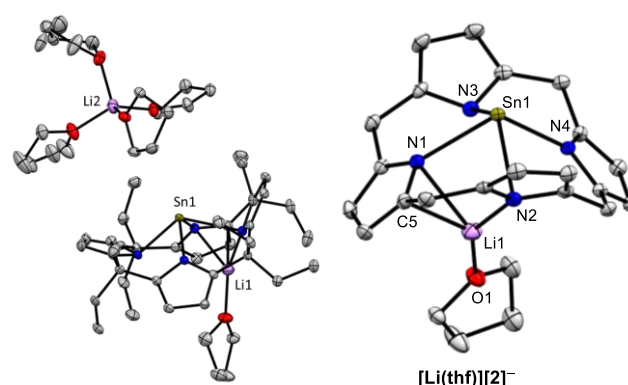

**Figure S43:** Solid state molecular structure of  $[\text{Li}_2(\text{thf})_x][2]$  (left) and the isolated  $[\text{Li}(\text{thf})][2]^-$  anion (left, *meso*-ethyl residues and solvated lithium counter cation are omitted for clarity). Ellipsoids are drawn with a probability of 50%. Hydrogen atoms are omitted for clarity.

**Table S3:** Crystal data for  $[\text{Li}_2(\text{thf})_x][2]$ .

|                                                    |                                                                      |
|----------------------------------------------------|----------------------------------------------------------------------|
| CCDC number                                        | 2125920                                                              |
| Identification code                                | mo_hr283_0ma                                                         |
| Empirical formula                                  | $\text{C}_{56}\text{H}_{88}\text{Li}_2\text{N}_4\text{O}_5\text{Sn}$ |
| Formula weight                                     | 1029.87                                                              |
| Temperature/K                                      | 100                                                                  |
| Crystal system                                     | monoclinic                                                           |
| Space group                                        | $P2_1/c$                                                             |
| $a/\text{\AA}$                                     | 17.0606(16)                                                          |
| $b/\text{\AA}$                                     | 16.1225(14)                                                          |
| $c/\text{\AA}$                                     | 19.5523(18)                                                          |
| $\alpha/^\circ$                                    | 90                                                                   |
| $\beta/^\circ$                                     | 90.037(4)                                                            |
| $\gamma/^\circ$                                    | 90                                                                   |
| Volume/ $\text{\AA}^3$                             | 5378.0(8)                                                            |
| Z                                                  | 4                                                                    |
| $\rho_{\text{calc}}/\text{g cm}^{-3}$              | 1.272                                                                |
| $\mu/\text{mm}^{-1}$                               | 0.525                                                                |
| F(000)                                             | 2192.0                                                               |
| Crystal size/ $\text{mm}^3$                        | $0.221 \times 0.164 \times 0.044$                                    |
| Radiation                                          | $\text{MoK}\alpha$ ( $\lambda = 0.71073$ )                           |
| $2\theta$ range for data collection/ $^\circ$      | 4.052 to 52                                                          |
| Index ranges                                       | $-21 \leq h \leq 21, -19 \leq k \leq 19, -24 \leq l \leq 24$         |
| Reflections collected                              | 236904                                                               |
| Independent reflections                            | 10548 [ $R_{\text{int}} = 0.0979, R_{\text{sigma}} = 0.0272$ ]       |
| Data/restraints/parameters                         | 10548/0/650                                                          |
| Goodness-of-fit in $F^2$                           | 1.081                                                                |
| Final R indexes [ $ I  > 2\sigma(I)$ ]             | $R_1 = 0.0293, wR_2 = 0.0591$                                        |
| Final R indexes [all data]                         | $R_1 = 0.0415, wR_2 = 0.0632$                                        |
| Largest diff. peak/hole/ $\text{e}\text{\AA}^{-3}$ | 0.47/-0.50                                                           |

## 5.2 [(NBu<sub>4</sub>)<sub>2</sub>][2]

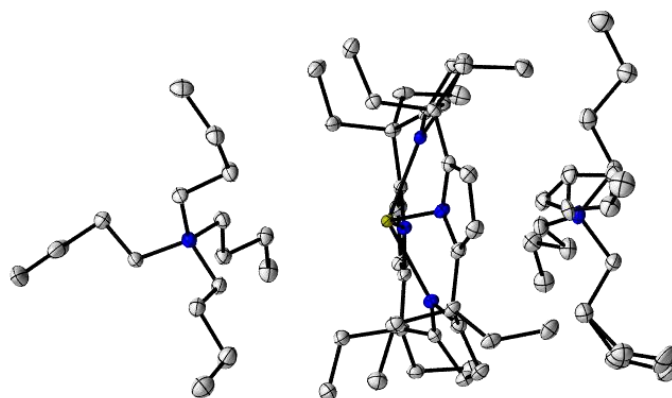

**Figure S44:** Solid state molecular structure of [(NBu<sub>4</sub>)<sub>2</sub>][2]. Ellipsoids are drawn with a probability of 50%. Hydrogen atoms are omitted for clarity.

**Table S4:** Crystal data for [(NBu<sub>4</sub>)<sub>2</sub>][2].

|                                                              |                                                                               |
|--------------------------------------------------------------|-------------------------------------------------------------------------------|
| CCDC number                                                  | 2125918                                                                       |
| Identification code                                          | mo_hr342_2_0ma                                                                |
| Empirical formula                                            | C <sub>68</sub> H <sub>120</sub> N <sub>6</sub> Sn                            |
| Formula weight                                               | 1140.38                                                                       |
| Temperature/K                                                | 100.0                                                                         |
| Crystal system                                               | orthorhombic                                                                  |
| Space group                                                  | <i>Pbca</i> (61)                                                              |
| <i>a</i> /Å                                                  | 18.9095(7)                                                                    |
| <i>b</i> /Å                                                  | 18.6657(5)                                                                    |
| <i>c</i> /Å                                                  | 35.9481(10)                                                                   |
| $\alpha$ /°                                                  | 90                                                                            |
| $\beta$ /°                                                   | 90                                                                            |
| $\gamma$ /°                                                  | 90                                                                            |
| Volume/Å <sup>3</sup>                                        | 12688.2(7)                                                                    |
| <i>Z</i>                                                     | 8                                                                             |
| $\rho_{\text{calc}}$ /g cm <sup>-3</sup>                     | 1.194                                                                         |
| $\mu$ /mm <sup>-1</sup>                                      | 0.447                                                                         |
| <i>F</i> (000)                                               | 4960                                                                          |
| Crystal size/mm <sup>3</sup>                                 | 0.349×0.342×0.263                                                             |
| Radiation                                                    | MoK $\alpha$ ( $\lambda$ =0.71073 Å)                                          |
| 2 $\theta$ range for data collection/°                       | 4.31 to 51.00 (0.83 Å)                                                        |
| Index ranges                                                 | -22 ≤ <i>h</i> ≤ 22, -22 ≤ <i>k</i> ≤ 22, -43 ≤ <i>l</i> ≤ 43                 |
| Reflections collected                                        | 83712                                                                         |
| Independent reflections                                      | 11805 [ <i>R</i> <sub>int</sub> = 0.0486, <i>R</i> <sub>sigma</sub> = 0.0294] |
| Data/restraints/parameters                                   | 11805/0/731                                                                   |
| Goodness-of-fit in <i>F</i> <sup>2</sup>                     | 1.045                                                                         |
| Final <i>R</i> indexes [ <i>I</i> ≥ 2 $\sigma$ ( <i>I</i> )] | <i>R</i> <sub>1</sub> = 0.0298, <i>wR</i> <sub>2</sub> = 0.0658               |
| Final <i>R</i> indexes [all data]                            | <i>R</i> <sub>1</sub> = 0.0354, <i>wR</i> <sub>2</sub> = 0.0685               |
| Largest diff. peak/hole/eÅ <sup>-3</sup>                     | 0.32/-0.53                                                                    |



### 5.3 [(PPh<sub>4</sub>)<sub>2</sub>(oDFB)<sub>0.5</sub>][2]

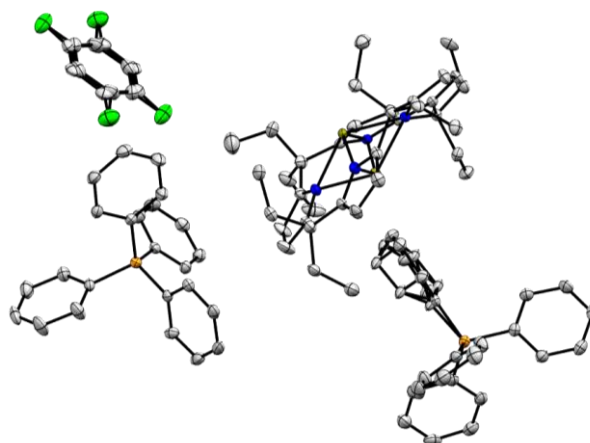

**Figure S45:** Solid state molecular structure of [(PPh<sub>4</sub>)<sub>2</sub>(oDFB)<sub>0.5</sub>][2]. Ellipsoids are drawn with a probability of 50%. Hydrogen atoms are omitted for clarity.

**Table S5:** Crystal data for [(PPh<sub>4</sub>)<sub>2</sub>(oDFB)<sub>0.5</sub>][2].

|                                           |                                                                   |
|-------------------------------------------|-------------------------------------------------------------------|
| CCDC number                               | 2125916                                                           |
| Identification code                       | mo_hr308_0ma                                                      |
| Empirical formula                         | C <sub>87</sub> H <sub>90</sub> FN <sub>4</sub> P <sub>2</sub> Sn |
| Formula weight                            | 1391.25                                                           |
| Temperature/K                             | 100(2)                                                            |
| Crystal system                            | triclinic                                                         |
| Space group                               | $P\bar{1}$ (2)                                                    |
| a/Å                                       | 12.227(4)                                                         |
| b/Å                                       | 12.276(5)                                                         |
| c/Å                                       | 23.438(10)                                                        |
| $\alpha$ /°                               | 87.397(10)                                                        |
| $\beta$ /°                                | 84.496(11)                                                        |
| $\gamma$ /°                               | 80.754(10)                                                        |
| Volume/Å <sup>3</sup>                     | 3455(2)                                                           |
| Z                                         | 2                                                                 |
| $\rho_{\text{calc}}/\text{g cm}^{-3}$     | 1.337                                                             |
| $\mu/\text{mm}^{-1}$                      | 0.470                                                             |
| F(000)                                    | 1458                                                              |
| Crystal size/mm <sup>3</sup>              | 0.169×0.084×0.030                                                 |
| Radiation                                 | MoK $\alpha$ ( $\lambda$ =0.71073 Å)                              |
| 2 $\theta$ range for data collection/°    | 3.95 to 50.00 (0.84 Å)                                            |
| Index ranges                              | -14 ≤ h ≤ 14, -14 ≤ k ≤ 14, -27 ≤ l ≤ 27                          |
| Reflections collected                     | 75371                                                             |
| Independent reflections                   | 12169 [ $R_{\text{int}} = 0.1052$ , $R_{\text{sigma}} = 0.0634$ ] |
| Data/restraints/parameters                | 12169/1209/935                                                    |
| Goodness-of-fit in F <sup>2</sup>         | 1.041                                                             |
| Final R indexes [ $ I  \geq 2\sigma(I)$ ] | $R_1 = 0.0440$ , $wR_2 = 0.0853$                                  |
| Final R indexes [all data]                | $R_1 = 0.0672$ , $wR_2 = 0.0929$                                  |
| Largest diff. peak/hole/eÅ <sup>-3</sup>  | 0.50/-0.54                                                        |

## 5.4 [(PPh<sub>4</sub>)<sub>2</sub>][W(<sup>η</sup>-2)(CO)<sub>5</sub>]

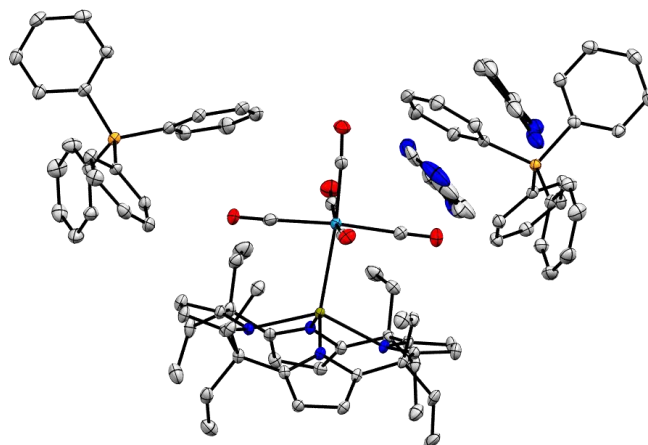

**Figure S46:** Solid state molecular structure of [(PPh<sub>4</sub>)<sub>2</sub>][2-W(CO)<sub>5</sub>]. Ellipsoids are drawn with a probability of 50%. Hydrogen atoms are omitted for clarity.

**Table S6:** Crystal data for [(PPh<sub>4</sub>)<sub>2</sub>][2-W(CO)<sub>5</sub>].

|                                          |                                                                                  |
|------------------------------------------|----------------------------------------------------------------------------------|
| CCDC number                              | 2125915                                                                          |
| Identification code                      | mo_hr313_2_2                                                                     |
| Empirical formula                        | C <sub>93</sub> H <sub>94</sub> N <sub>6</sub> O <sub>5</sub> P <sub>2</sub> SnW |
| Formula weight                           | 1740.22                                                                          |
| Temperature/K                            | 100(2)                                                                           |
| Crystal system                           | triclinic                                                                        |
| Space group                              | $P\bar{1}$ (2)                                                                   |
| a/Å                                      | 13.510(2)                                                                        |
| b/Å                                      | 13.587(2)                                                                        |
| c/Å                                      | 25.095(4)                                                                        |
| α/°                                      | 81.048(6)                                                                        |
| β/°                                      | 84.270(7)                                                                        |
| γ/°                                      | 60.976(5)                                                                        |
| Volume/Å <sup>3</sup>                    | 3977.3(12)                                                                       |
| Z                                        | 2                                                                                |
| ρ <sub>calc</sub> /g cm <sup>-3</sup>    | 1.453                                                                            |
| μ/mm <sup>-1</sup>                       | 1.857                                                                            |
| F(000)                                   | 1776                                                                             |
| Crystal size/mm <sup>3</sup>             | 0.107×0.103×0.044                                                                |
| Radiation                                | MoK <sub>α</sub> (λ=0.71073 Å)                                                   |
| 2θ range for data collection/°           | 3.78 to 56.02 (0.76 Å)                                                           |
| Index ranges                             | -17 ≤ h ≤ 17, -17 ≤ k ≤ 17, -33 ≤ l ≤ 33                                         |
| Reflections collected                    | 193114                                                                           |
| Independent reflections                  | 19158 [R <sub>int</sub> = 0.1119, R <sub>sigma</sub> = 0.0560]                   |
| Data/restraints/parameters               | 19158/2225/1011                                                                  |
| Goodness-of-fit in F <sup>2</sup>        | 1.017                                                                            |
| Final R indexes [I > 2σ(I)]              | R <sub>1</sub> = 0.0316, wR <sub>2</sub> = 0.0665                                |
| Final R indexes [all data]               | R <sub>1</sub> = 0.0430, wR <sub>2</sub> = 0.0720                                |
| Largest diff. peak/hole/eÅ <sup>-3</sup> | 1.00/-1.01                                                                       |

## 5.5 Ru( $\eta^5$ -2)(cymene)

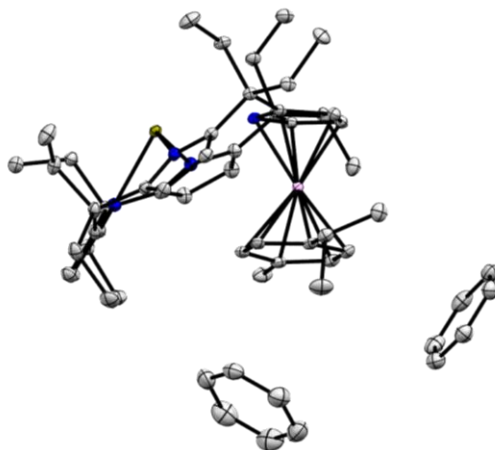

**Figure S47:** Solid state molecular structure of Ru( $\eta^5$ -2)(cymene). Ellipsoids are drawn with a probability of 50%. Hydrogen atoms are omitted for clarity.

**Table S7:** Crystal data for Ru( $\eta^5$ -2)(cymene).

|                                           |                                                                   |
|-------------------------------------------|-------------------------------------------------------------------|
| CCDC number                               | 2125917                                                           |
| Identification code                       | mo_hr372_0ma                                                      |
| Empirical formula                         | C <sub>58</sub> H <sub>74</sub> N <sub>4</sub> RuSn               |
| Formula weight                            | 1046.97                                                           |
| Temperature/K                             | 100(2)                                                            |
| Crystal system                            | triclinic                                                         |
| Space group                               | $P\bar{1}$ (2)                                                    |
| a/Å                                       | 11.465(3)                                                         |
| b/Å                                       | 12.8505(17)                                                       |
| c/Å                                       | 19.451(4)                                                         |
| $\alpha$ /°                               | 97.710(8)                                                         |
| $\beta$ /°                                | 101.873(10)                                                       |
| $\gamma$ /°                               | 114.506(5)                                                        |
| Volume/Å <sup>3</sup>                     | 2473.0(9)                                                         |
| Z                                         | 2                                                                 |
| $\rho_{\text{calc}}/\text{g cm}^{-3}$     | 1.406                                                             |
| $\mu/\text{mm}^{-1}$                      | 0.853                                                             |
| F(000)                                    | 1088                                                              |
| Crystal size/mm <sup>3</sup>              | 0.123×0.106×0.074                                                 |
| Radiation                                 | MoK $\alpha$ ( $\lambda=0.71073$ Å)                               |
| 2 $\theta$ range for data collection/°    | 4.02 to 57.46 (0.74 Å)                                            |
| Index ranges                              | -15 ≤ h ≤ 15, -17 ≤ k ≤ 17, -26 ≤ l ≤ 26                          |
| Reflections collected                     | 155733                                                            |
| Independent reflections                   | 12835 [ $R_{\text{int}} = 0.0390$ , $R_{\text{sigma}} = 0.0165$ ] |
| Data/restraints/parameters                | 12835/282/588                                                     |
| Goodness-of-fit in F <sup>2</sup>         | 1.089                                                             |
| Final R indexes [ $ I  \geq 2\sigma(I)$ ] | $R_1 = 0.0180$ , $wR_2 = 0.0476$                                  |
| Final R indexes [all data]                | $R_1 = 0.0207$ , $wR_2 = 0.0485$                                  |
| Largest diff. peak/hole/eÅ <sup>-3</sup>  | 0.46/-0.57                                                        |

## 5.6 [Li(thf)<sub>2</sub>][3-COPh]

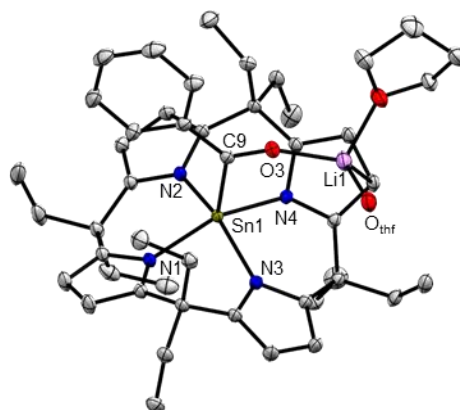

**Figure S48:** Solid state molecular structure of [Li(thf)<sub>2</sub>][3-COPh]. Displacement ellipsoids are drawn at 50% probability level. Hydrogens and toluene solvent molecules are omitted for clarity.

**Table S8:** Crystal data for [Li(thf)<sub>2</sub>][3-COPh].

|                                          |                                                                    |
|------------------------------------------|--------------------------------------------------------------------|
| CCDC number                              | 2125919                                                            |
| Identification code                      | mo_hr389c_0m_a                                                     |
| Empirical formula                        | C <sub>58</sub> H <sub>77</sub> LiN <sub>4</sub> O <sub>3</sub> Sn |
| Formula weight                           | 1003.86                                                            |
| Temperature/K                            | 101(2)                                                             |
| Crystal system                           | triclinic                                                          |
| Space group                              | $P\bar{1}$ (2)                                                     |
| a/Å                                      | 10.618(3)                                                          |
| b/Å                                      | 11.653(3)                                                          |
| c/Å                                      | 21.103(5)                                                          |
| α/°                                      | 99.542(11)                                                         |
| β/°                                      | 93.042(8)                                                          |
| γ/°                                      | 92.079(12)                                                         |
| Volume/Å <sup>3</sup>                    | 2568.7(12)                                                         |
| Z                                        | 2                                                                  |
| ρ <sub>calc</sub> /g cm <sup>-3</sup>    | 1.298                                                              |
| μ/mm <sup>-1</sup>                       | 0.545                                                              |
| F(000)                                   | 1060                                                               |
| Crystal size/mm <sup>3</sup>             | 0.339×0.313×0.207                                                  |
| Radiation                                | MoK <sub>α</sub> (λ=0.71073 Å)                                     |
| 2θ range for data collection/°           | 3.92 to 61.11 (0.70 Å)                                             |
| Index ranges                             | -15 ≤ h ≤ 15, -16 ≤ k ≤ 16, -30 ≤ l ≤ 30                           |
| Reflections collected                    | 101029                                                             |
| Independent reflections                  | 15729 [R <sub>int</sub> = 0.0476, R <sub>sigma</sub> = 0.0311]     |
| Data/restraints/parameters               | 15729/831/734                                                      |
| Goodness-of-fit in F <sup>2</sup>        | 1.037                                                              |
| Final R indexes [I ≥ 2σ(I)]              | R <sub>1</sub> = 0.0242, wR <sub>2</sub> = 0.0560                  |
| Final R indexes [all data]               | R <sub>1</sub> = 0.0263, wR <sub>2</sub> = 0.0572                  |
| Largest diff. peak/hole/eÅ <sup>-3</sup> | 0.49/-0.56                                                         |

## 6 Infrared Spectroscopy

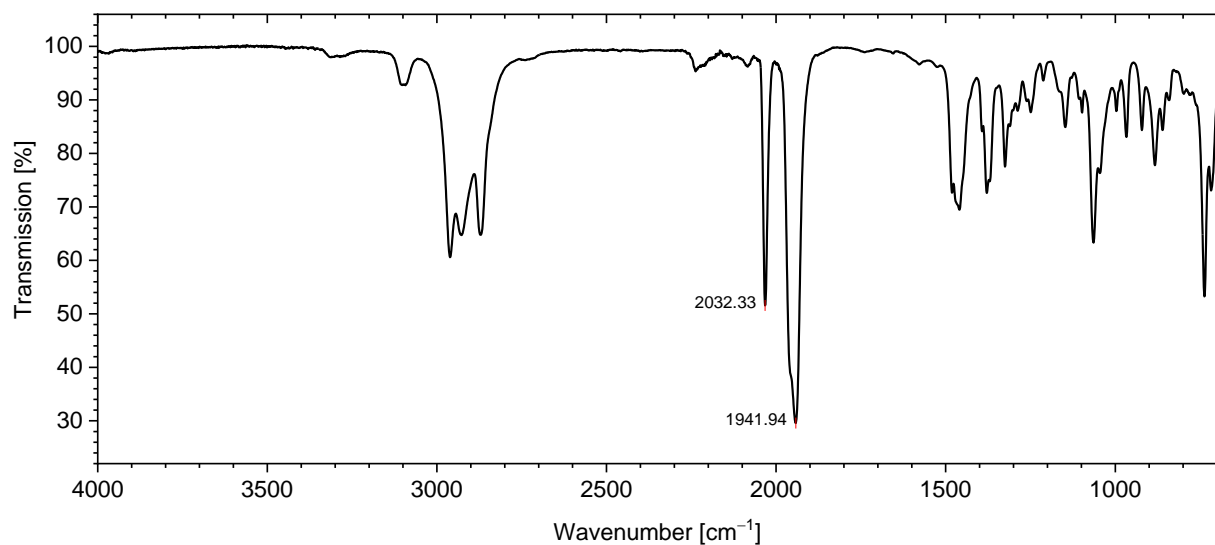

Figure S49: FTIR spectrum of  $[(\text{NBu}_4)_2][\text{Ni}(\eta\text{-}2)(\text{CO})_3]$  in  $\text{THF-}d_8$ .

## 7 Comparative TEP Scale

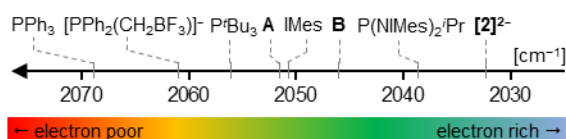

Figure S50. Comparison between TEP values of  $[\mathbf{2}]^{2-}$  and other literature known carbene and phosphine ligands.

Table S9. TEP values of  $[\mathbf{2}]^{2-}$  and other literature known carbene and phosphine ligands.

| Compound                                   | TEP [ $\text{cm}^{-1}$ ] | Solvent | Reference |
|--------------------------------------------|--------------------------|---------|-----------|
| $[\mathbf{2}]^{2-}$                        | 2032.3                   | THF     | This work |
| $\text{P}(\text{NIMes})_2\text{iPr}$       | 2038.6                   | DCM     | [20]      |
| <b>B</b>                                   | 2046                     | DCM     | [21]      |
| IMes                                       | 2050.7                   | DCM     | [22]      |
| IPr ( <b>A</b> )                           | 2051.5                   | DCM     | [20]      |
| $\text{P}^t\text{Bu}_3$                    | 2056.1                   | DCM     | [20]      |
| $[\text{PPh}_2(\text{CH}_2\text{BF}_3)]^-$ | 2061                     | DCM     | [23]      |
| $\text{PPh}_3$                             | 2068.9                   | DCM     | [20]      |

## 8 DFT Calculations

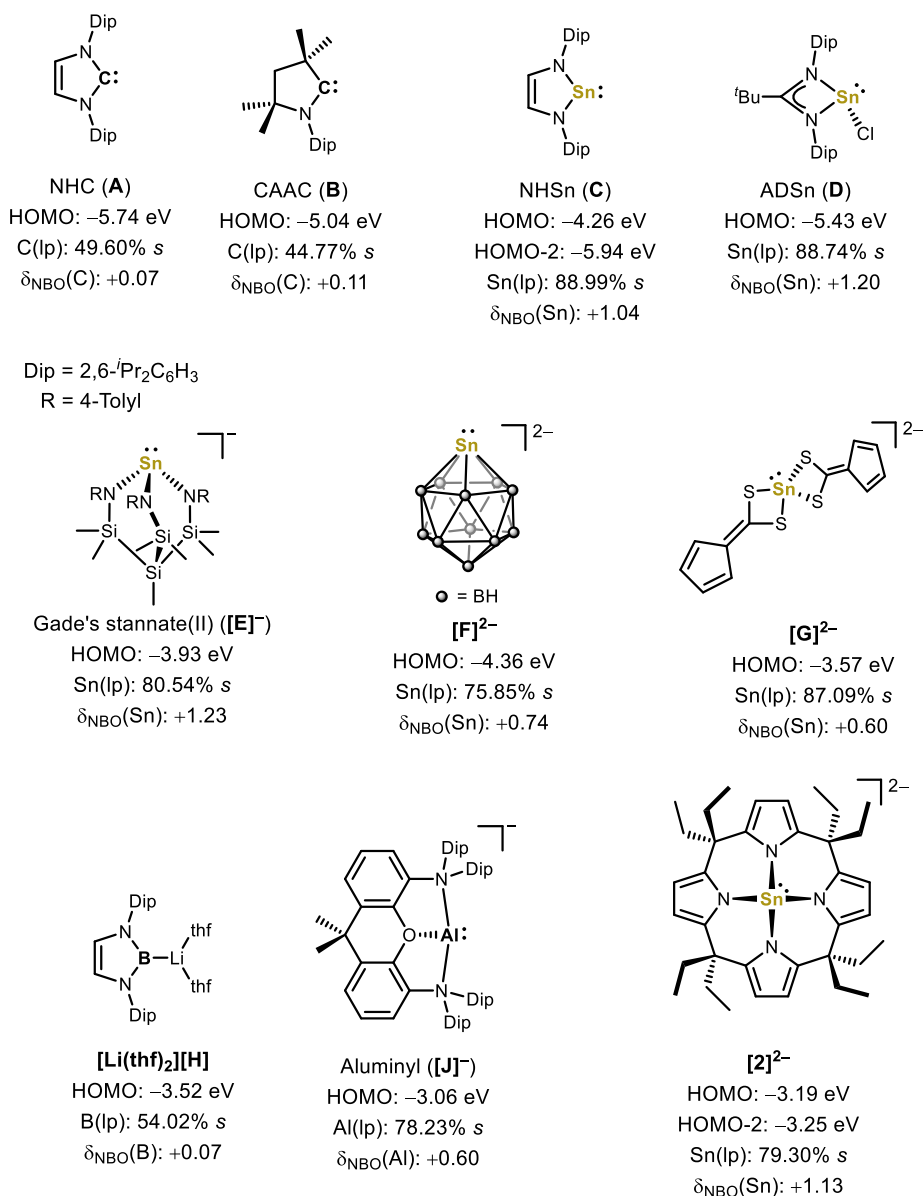

**Figure S51.** HOMO energy levels, *s*-character of the lone pair (lp), and NBO atomic charges  $\delta_{\text{NBO}}$  of the central atom for the NHC **A**, the CAAC **B**, the NHSn **C**, ADSn **D**, the anionic stannate(II) **[E]<sup>-</sup>**, the dianionic stannates(II) **[F]<sup>2-</sup>**, and **[G]<sup>2-</sup>**, the boryl **H**, the aluminyl anion **[J]<sup>-</sup>**, and **[2]<sup>2-</sup>**. HOMO energies were calculated at the B97M-D3(BJ)/def2-TZVPP CPCM(THF)//B97M-D3(BJ)/def2-TZVPP and NBO analysis at the PBE0/def2-TZVPP CPCM(THF)//B97M-D3(BJ)/def2-TZVPP level of theory. For **C** and **[2]<sup>2-</sup>** the HOMO and HOMO-1 are mainly ligand-centered and the energies of their HOMO-2 containing a mayor contribution of their tin-centered lone pairs are given as well.

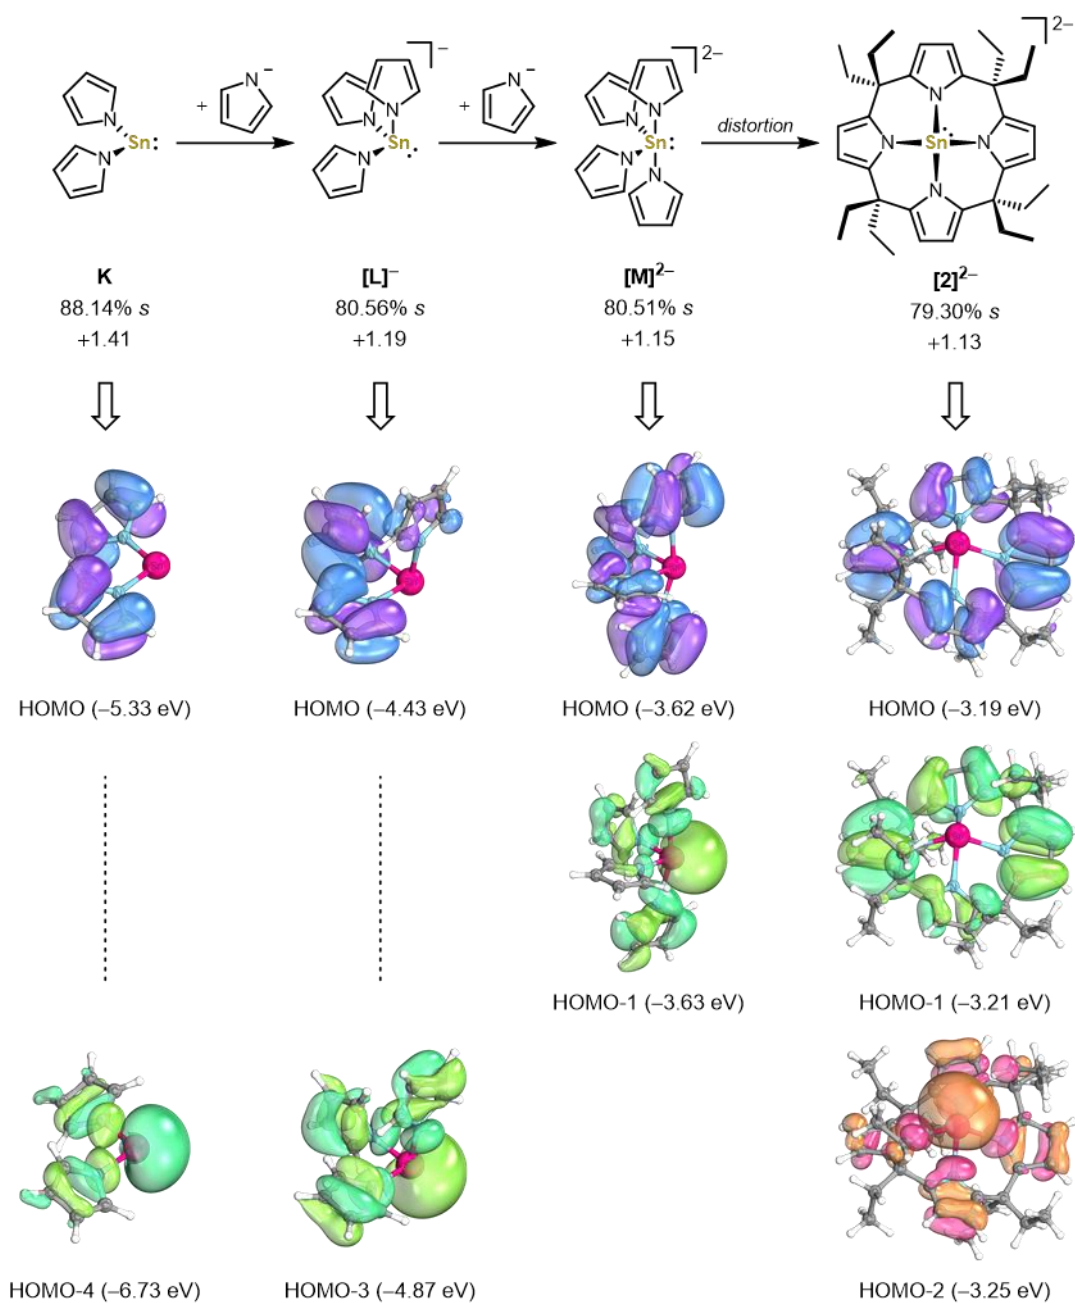

**Figure S52.** Frontier molecular orbital energies for the hypothetical pyrrolato stannanes **K**, **[M]<sup>-</sup>**, and **[L]<sup>2-</sup>**, and **[2]<sup>2-</sup>** at the B97M-D3(BJ)/def2-TVZPP CPCM(THF)//B97M-D3(BJ)/def2-TVZPP level of theory and *s*-character of the lone pair and NBO atomic charges at the central atom calculated on the PBE0/def2-TVZPP CPCM(THF)//B97M-D3(BJ)/def2-TVZPP level of theory. Isosurfaces sampled at a value of 0.03.

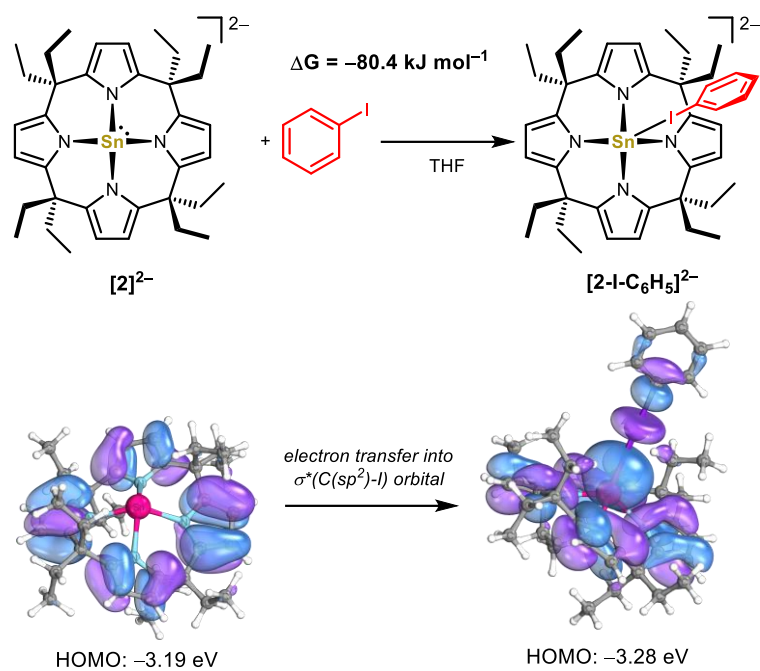

**Figure S53.** Free reaction enthalpy for the  $\sigma$ -hole adduction formation between  $[2]^{2-}$  and iodobenzene and frontier molecular orbitals calculated on the B97M-D3(BJ)/def2-TVZPP CPCM(THF)//B97M-D3(BJ)/def2-TVZPP level of theory. Isosurfaces sampled at a value of 0.03.



## 9 Cyclic Voltammetry

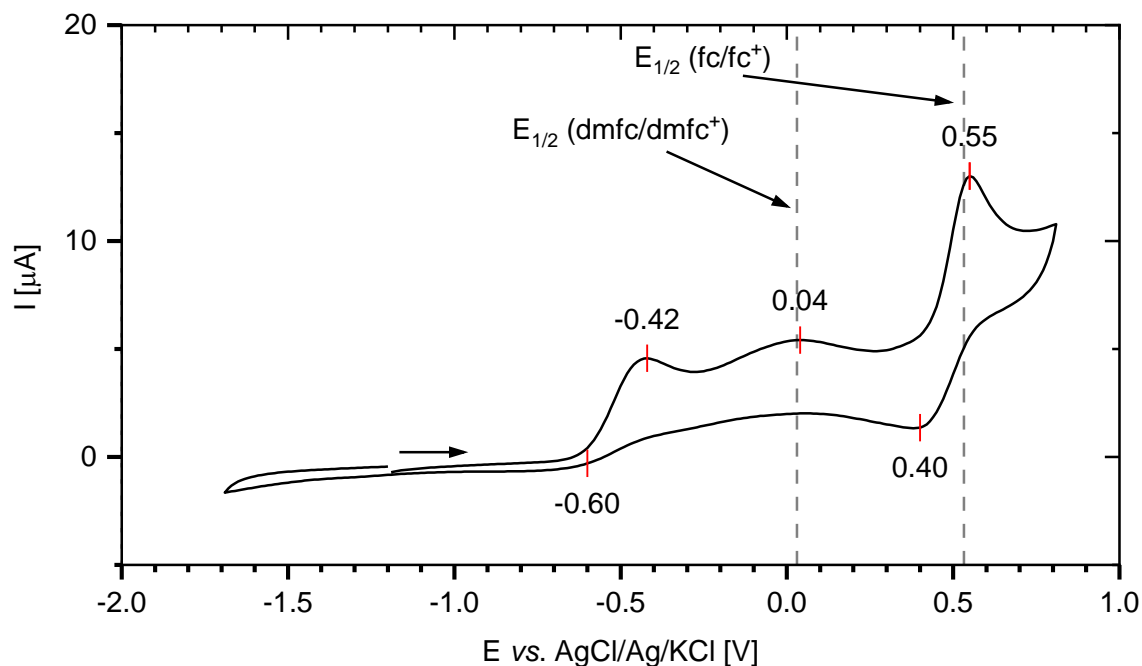

Figure S54: Cyclic voltammogram of  $[(\text{NBu}_4)_2][\mathbf{2}]$  and  $[\text{NBu}_4][\text{PF}_6]$  in *o*DFB.

## 10 ETS-NOCV Results

Table S11: Bonding energy decomposition terms calculated on the BP86-D3/TZ2P COSMO(THF)//B97M-D3(BJ)/def2-TVZPP level of theory.

| Compound                                 | Total Pauli Repulsion ( $\Delta E_{\text{Pauli}}$ ) [Eh] | Total Electrostatic Interaction ( $\Delta V_{\text{elst}}$ ) [Eh] | Total Orbital Interaction ( $\Delta E_{\text{oi,tot}}$ ) [Eh] | Total Dispersion Energy ( $E_{\text{disp}}$ ) [Eh] | Solvation Energy ( $E_{\text{solv}}$ ) [Eh] | Residue [Eh] | Total Bonding Energy ( $\Delta E$ ) [Eh] |
|------------------------------------------|----------------------------------------------------------|-------------------------------------------------------------------|---------------------------------------------------------------|----------------------------------------------------|---------------------------------------------|--------------|------------------------------------------|
| $[\mathbf{2}]^{2-}$                      | 0.477164845                                              | -1.340814347                                                      | -0.573479385                                                  | -0.010706268                                       | -0.173999447                                | 0.004544433  | -0.169455015                             |
| $[\text{Sn}(\text{pyr})_4]^{2-}$         | 0.463414466                                              | -1.446258898                                                      | -0.535590216                                                  | -0.006556682                                       | -0.20239567                                 | 0.00298029   | -0.19941538                              |
| $[\mathbf{2}\text{-Se}]^{2-}$            | 0.350999376                                              | -0.236227689                                                      | -0.294142204                                                  | -0.012874307                                       | -0.189065305                                | 0.004530776  | -0.184534529                             |
| $[\mathbf{2}^{\text{H}}\text{-Se}]^{2-}$ | 0.331996112                                              | -0.228345683                                                      | -0.292003221                                                  | -0.009634874                                       | -0.216411735                                | 0.003181708  | -0.213230027                             |

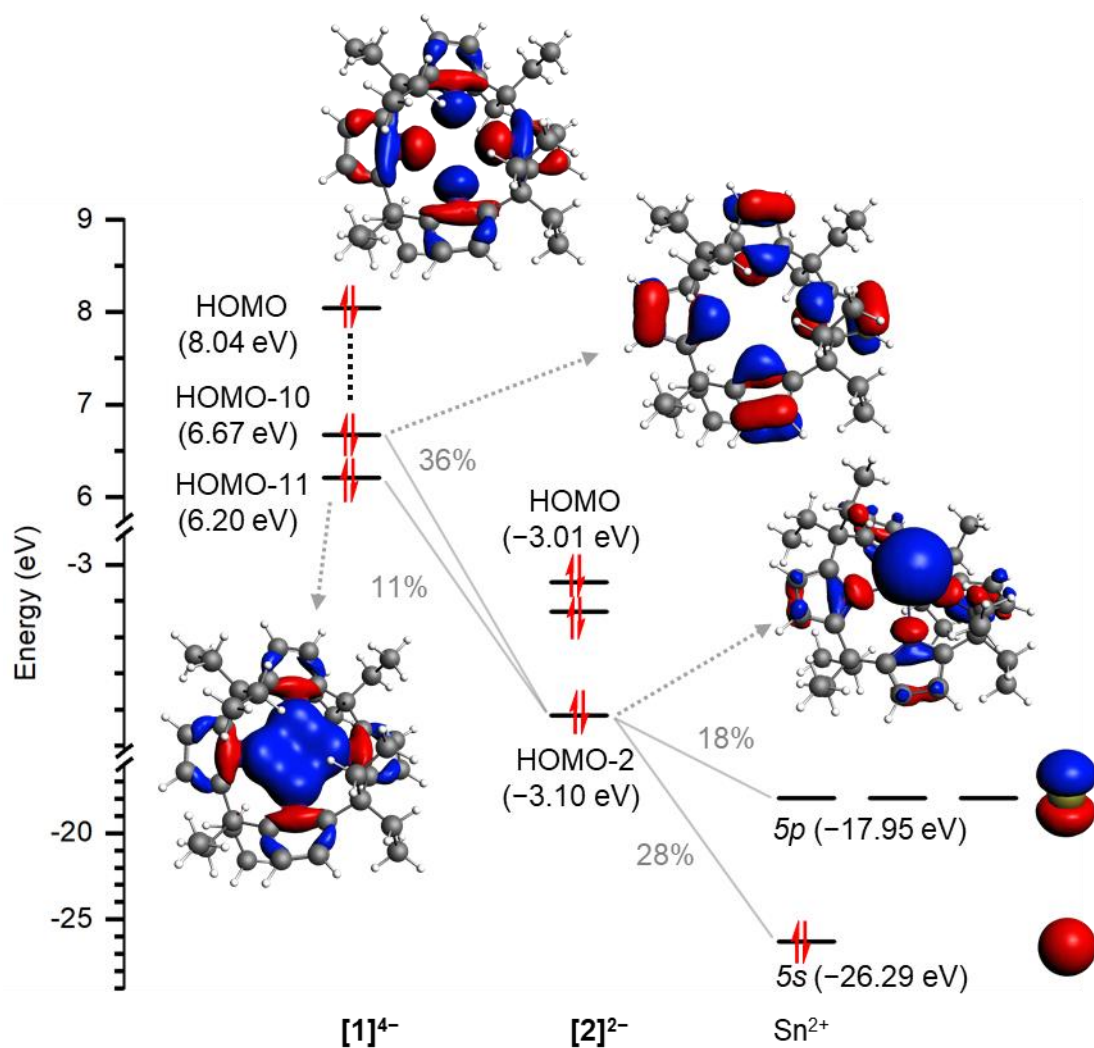

**Figure S55.** ETS-NOCV bond analysis of  $[2]^{2-}$  on the BP86-D3/TZ2P COSMO(THF)//B97M-D3(BJ)/def2-TVZPP level of theory. Isosurfaces sampled at a value of 0.03.

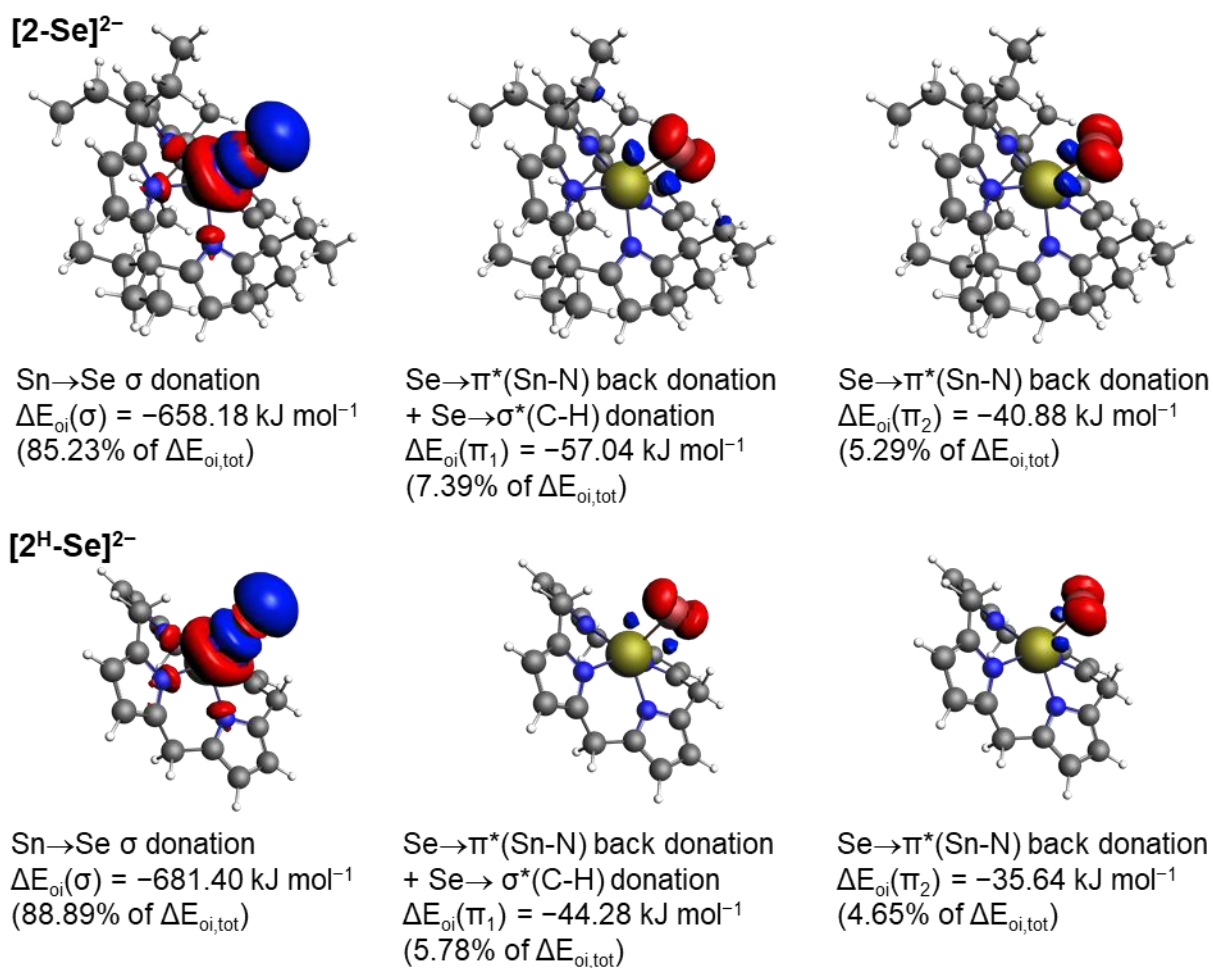

**Figure S56.** ETS-NOCV bond analysis of **[2-Se]<sup>2-</sup>** and the *meso*-unsubstituted derivative **[2<sup>H</sup>-Se]<sup>2-</sup>** on the BP86-D3/TZ2P COSMO(THF)//B97M-D3(BJ)/def2-TVZPP level of theory. The Se fragment was considered in its closed shell <sup>1</sup>D excited state with doubly occupied p<sub>x</sub> and p<sub>y</sub> orbitals and an empty p<sub>z</sub> orbital directed towards the Sn(II) lone pair of a singlet tin(II) calix[4]pyrrolato fragment. NOCV deformation densities sampled at a value of 0.003. The color code of the charge flow is red to blue.

## 11 NBO Results

**Table S12:** NBO analysis results calculated on PBE0/def2-TZVPP CPCM(THF)//B97M-D3(BJ)/def2-TZVPP level of theory. NBO and second order perturbation theory stabilization energies  $\Delta E^{(2)}$  for selected bonding interactions are given in  $\text{kJ mol}^{-1}$ . Additionally, Lewis density parameters  $\% \rho_L$  and single point energies are given for each system.

|                                                                                                                               |         |
|-------------------------------------------------------------------------------------------------------------------------------|---------|
| <b>NHC (A)</b> (single point energy = $-1159.062799534277$ Eh, $\% \rho_L = 97.91$ )                                          |         |
| s-Character of lp(1) at C2                                                                                                    | 49.60%  |
| Natural charge at C2                                                                                                          | 0.073   |
| <b>CAAC (B)</b> (single point energy = $-874.060935133861$ Eh, $\% \rho_L = 98.32$ )                                          |         |
| s-Character of lp(1) at C2                                                                                                    | 41.18%  |
| Natural charge at C2                                                                                                          | 0.127   |
| <b>NHB Li THF Adduct (H)</b> (single point energy = $-1617.970242201778$ Eh, $\% \rho_L = 99.32$ )                            |         |
| s-Character of lp(1) at B1                                                                                                    | 54.02%  |
| Natural charge at B1                                                                                                          | 0.072   |
| <b>NHSn (C)</b> (single point energy = $-1335.373499564167$ Eh, $\% \rho_L = 98.13$ )                                         |         |
| s-Character of lp(1) at Sn2                                                                                                   | 88.99%  |
| Natural charge at Sn2                                                                                                         | 1.040   |
| <b>ADSn (D)</b> (single point energy = $-1913.919385348876$ Eh, $\% \rho_L = 99.98$ )                                         |         |
| s-Character of lp(1) at Sn2                                                                                                   | 88.74%  |
| Natural charge at Sn2                                                                                                         | 1.203   |
| <b>Bis dithiolato stannate(II) [G]<sup>2-</sup></b> (single point energy = $-2268.592659566669$ Eh, $\% \rho_L = 98.23$ )     |         |
| s-Character of lp(1) at Sn1                                                                                                   | 87.09   |
| Natural charge at Sn1                                                                                                         | 0.600   |
| <b>Stanna dodecaborate [F]<sup>2-</sup></b> (single point energy = $-494.486522724303$ Eh, $\% \rho_L = 98.31$ )              |         |
| s-Character of lp(1) at Sn5                                                                                                   | 75.85%  |
| Natural charge at Sn5                                                                                                         | 0.741   |
| <b>Gade's stannate (II) ([E]<sup>-</sup>)</b> (single point energy = $-2627.689403573425$ Eh, $\% \rho_L = 98.29$ )           |         |
| s-Character of lp(1) at Sn78                                                                                                  | 80.54%  |
| Natural charge at Sn78                                                                                                        | 1.232   |
| <b>Aldridge's Aluminyl Anion ([J]<sup>-</sup>)</b> (single point energy = $-2293.177232006270$ Eh, $\% \rho_L = 97.85$ )      |         |
| s-Character of lp(1) at Al29                                                                                                  | 78.34%  |
| Natural charge at Al29                                                                                                        | 0.603   |
| <b>[2]<sup>2-</sup></b> (single point energy = $-1832.964212044182$ Eh, $\% \rho_L = 98.14$ )                                 |         |
| s-Character of lp(1) at Sn89                                                                                                  | 79.30%  |
| Natural charge at Sn89                                                                                                        | 1.129   |
| <b>[2-Se]<sup>2-</sup></b> (single point energy = $-4234.292224$ Eh, $\% \rho_L = 98.40$ )                                    |         |
| NBO175 $\sigma_{\text{Sn89-Se90}}$ (occupation = 1.94116)                                                                     | -925.49 |
| $\Delta E^{(2)}$ lp(2) <sub>Se90</sub> $\rightarrow$ $\pi^*_{\text{N1-Sn89}}$                                                 | 6.31    |
| $\Delta E^{(2)}$ lp(2) <sub>Se90</sub> $\rightarrow$ $\pi^*_{\text{N27-Sn89}}$                                                | 14.83   |
| $\Delta E^{(2)}$ lp(2) <sub>Se90</sub> $\rightarrow$ $\pi^*_{\text{N61-Sn89}}$                                                | 14.78   |
| $\Delta E^{(2)}$ lp(2) <sub>Se90</sub> $\rightarrow$ $\pi^*_{\text{N71-Sn89}}$                                                | 6.26    |
| $\Delta E^{(2)}$ lp(3) <sub>Se90</sub> $\rightarrow$ $\sigma^*_{\text{C16-H17}}$ ( <b>C(sp<sup>3</sup>)H-Se interaction</b> ) | 21.88   |
| $\Delta E^{(2)}$ lp(3) <sub>Se90</sub> $\rightarrow$ $\sigma^*_{\text{C78-H80}}$ ( <b>C(sp<sup>3</sup>)H-Se interaction</b> ) | 21.67   |
| $\Delta E^{(2)}$ lp(3) <sub>Se90</sub> $\rightarrow$ $\pi^*_{\text{N1-Sn89}}$                                                 | 14.30   |
| $\Delta E^{(2)}$ lp(3) <sub>Se90</sub> $\rightarrow$ $\pi^*_{\text{N27-Sn89}}$                                                | 4.86    |

|                                                                                                                                |                |
|--------------------------------------------------------------------------------------------------------------------------------|----------------|
| $\Delta E^{(2)} \text{Ip}(3)_{\text{Se90}} \rightarrow \pi^*_{\text{N61-Sn89}}$                                                | 4.86           |
| $\Delta E^{(2)} \text{Ip}(3)_{\text{Se90}} \rightarrow \pi^*_{\text{N71-Sn89}}$                                                | 14.25          |
| <b>[2<sup>H</sup>-Se]<sup>2-</sup> (single point energy = -3605.895922 Eh, %<math>\rho_L</math> = 98.06)</b>                   |                |
| <b>NBO111 <math>\sigma_{\text{Sn33-Se34}}</math> (occupation = 1.94806)</b>                                                    | <b>-953.08</b> |
| $\Delta E^{(2)} \text{Ip}(2)_{\text{Se34}} \rightarrow \pi^*_{\text{N1-Sn33}}$                                                 | 8.79           |
| $\Delta E^{(2)} \text{Ip}(2)_{\text{Se34}} \rightarrow \pi^*_{\text{N13-Sn33}}$                                                | 9.25           |
| $\Delta E^{(2)} \text{Ip}(2)_{\text{Se34}} \rightarrow \pi^*_{\text{N19-Sn33}}$                                                | 9.25           |
| $\Delta E^{(2)} \text{Ip}(2)_{\text{Se34}} \rightarrow \pi^*_{\text{N29-Sn33}}$                                                | 8.74           |
| $\Delta E^{(2)} \text{Ip}(3)_{\text{Se34}} \rightarrow \sigma^*_{\text{C32-H40}}$ ( <b>C(sp<sup>3</sup>)H-Se interaction</b> ) | 4.14           |
| $\Delta E^{(2)} \text{Ip}(3)_{\text{Se34}} \rightarrow \sigma^*_{\text{C8-H36}}$ ( <b>C(sp<sup>3</sup>)H-Se interaction</b> )  | 4.06           |
| $\Delta E^{(2)} \text{Ip}(3)_{\text{Se34}} \rightarrow \pi^*_{\text{N1-Sn33}}$                                                 | 9.29           |
| $\Delta E^{(2)} \text{Ip}(3)_{\text{Se34}} \rightarrow \pi^*_{\text{N13-Sn33}}$                                                | 8.74           |
| $\Delta E^{(2)} \text{Ip}(3)_{\text{Se34}} \rightarrow \pi^*_{\text{N19-Sn33}}$                                                | 8.74           |
| $\Delta E^{(2)} \text{Ip}(3)_{\text{Se34}} \rightarrow \pi^*_{\text{N29-Sn33}}$                                                | 9.29           |

## 12 $^{77}\text{Se}$ and $^{119}\text{Sn}$ NMR Shift Calculation Results

**Table S13:**  $^{77}\text{Se}$  and  $^{119}\text{Sn}$  NMR shifts calculated on the PBE0/SO-ZORA-TZ2P COSMO(THF)//B97M-D3(BJ)/def2-TZVPP level of theory and referenced against  $\text{SeMe}_2$  and  $\text{SnMe}_4$ , respectively.

| Compound                          | Total $^{119}\text{Sn}$ NMR isotropic shielding tensor [ppm] | $^{119}\text{Sn}$ NMR chemical shift against $\text{SnMe}_4$ [ppm] | Total $^{77}\text{Se}$ NMR isotropic shielding tensor [ppm] | $^{77}\text{Se}$ NMR chemical shift against $\text{SeMe}_2$ [ppm] |
|-----------------------------------|--------------------------------------------------------------|--------------------------------------------------------------------|-------------------------------------------------------------|-------------------------------------------------------------------|
| $\text{SnMe}_4$                   | 3004.14                                                      | 0.00                                                               | -                                                           | -                                                                 |
| $\text{SeMe}_4$                   | -                                                            | -                                                                  | 1978.08                                                     | 0.00                                                              |
| $[\mathbf{2}]^{2-}$               | 3513.52                                                      | -509.38                                                            | -                                                           | -                                                                 |
| $[\mathbf{2-Se}]^{2-}$            | 3575.747                                                     | -571.606                                                           | 2427.45                                                     | -449.37                                                           |
| $[\mathbf{2}^{\text{H-Se}}]^{2-}$ | 3562.074                                                     | -557.933                                                           | 2616.62                                                     | -638.54                                                           |

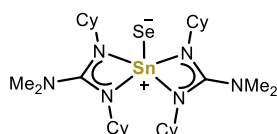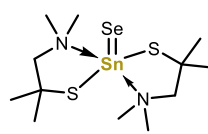

Ahmet *et al.* *J. Inorg. Chem.* **2018**, 2018, 1670-1678. Park *et al.* *Inorg. Chem.* **2020**, 59, 3513-3517.

$$\delta(^{77}\text{Se}, \text{C}_6\text{D}_6) = -476.01 \text{ ppm}$$

$$\delta(^{119}\text{Sn}, \text{C}_6\text{D}_6) = -566.30 \text{ ppm}$$

$$\delta(^{77}\text{Se}, \text{C}_6\text{D}_6) = -218.13 \text{ ppm}$$

$$\delta(^{119}\text{Sn}, \text{C}_6\text{D}_6) = -264.50 \text{ ppm}$$

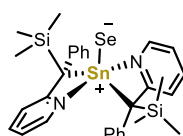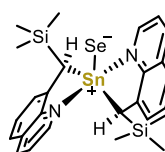

Leung *et al.* *Organometallics* **2000**, 19, 296-303.

Leung *et al.* *Organometallics* **2000**, 19, 296-303.

$$\delta(^{77}\text{Se}, \text{THF}/\text{C}_6\text{D}_6) = -531.95 \text{ ppm}$$

$$\delta(^{119}\text{Sn}, \text{THF}/\text{C}_6\text{D}_6) = -179.18 \text{ ppm}$$

$$\delta(^{77}\text{Se}, \text{THF}/\text{C}_6\text{D}_6) = -734.8 \text{ ppm}$$

$$\delta(^{119}\text{Sn}, \text{THF}/\text{C}_6\text{D}_6) = -111.55 \text{ ppm}$$

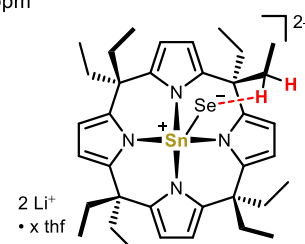

$[\text{Li}_2(\text{thf})_x][\mathbf{2-Se}]$

$$\delta(^{77}\text{Se}, \text{THF-d}_8) = -391.99 \text{ ppm}$$

$$\delta(^{119}\text{Sn}, \text{THF-d}_8) = -560.18 \text{ ppm}$$

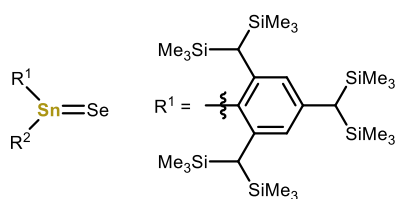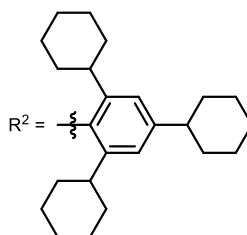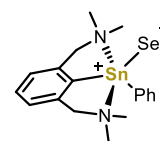

Saito *et al.* *J. Am. Chem. Soc.* **2004**, 126, 15572-15582.

$$\delta(^{77}\text{Se}, \text{CDCl}_3) = 839 \text{ ppm}$$

$$\delta(^{119}\text{Sn}, \text{CDCl}_3) = 556 \text{ ppm}$$

Mairychová *et al.* *Organometallics* **2011**, 30, 5904-5910.

$$\delta(^{77}\text{Se}, \text{CDCl}_3) = -570.90 \text{ ppm}$$

$$\delta(^{119}\text{Sn}, \text{CDCl}_3) = -4.70 \text{ ppm}$$

**Figure S57.** Experimental  $^{77}\text{Se}$  and  $^{119}\text{Sn}$  NMR data for  $[\text{Li}_2(\text{thf})_x][\mathbf{2-Se}]$  and other literature-known, monomeric stanna(II) selenido complexes.

## 13 Optimized Molecular Geometries

aldrdige\_aluminyln\_anion\_B97M\_D3\_TZVPP\_optfreq

Total correction: 2823.8826 kJ/mol

Single point energy: -6032185.6891 kJ/mol

S53

Total enthalpy: -6029359.3278 kJ/mol  
Final entropy term: 343.6942 kJ/mol  
Total gibbs free enthalpy: -6029703.022 kJ/mol  
Method and Basis: B97M-D3BJ / def2-TZVPP

xyz, charge: -1, multiplicity: 1

|    |           |           |           |
|----|-----------|-----------|-----------|
| C  | 0.561060  | 0.112350  | 0.399967  |
| C  | 0.916841  | -0.035129 | 3.089450  |
| C  | 0.346933  | -1.126870 | 0.988810  |
| C  | 0.845545  | 1.279366  | 1.059714  |
| C  | 1.042116  | 1.192620  | 2.433955  |
| C  | 0.567449  | -1.174009 | 2.375185  |
| H  | 1.277005  | 2.078148  | 2.995806  |
| H  | 0.416692  | -2.111941 | 2.874651  |
| C  | 0.861701  | 2.549502  | 0.214672  |
| C  | 0.789340  | 3.797524  | 1.070399  |
| H  | 1.645420  | 3.850361  | 1.734980  |
| H  | -0.113815 | 3.817783  | 1.670766  |
| H  | 0.806764  | 4.685072  | 0.446653  |
| C  | 2.158465  | 2.584780  | -0.604001 |
| H  | 3.018769  | 2.618430  | 0.059136  |
| H  | 2.173501  | 3.464888  | -1.241176 |
| H  | 2.244960  | 1.707188  | -1.232328 |
| C  | -0.326497 | 2.442259  | -0.734196 |
| C  | -2.599602 | 1.865423  | -2.255763 |
| C  | -1.241714 | 3.447182  | -1.036875 |
| C  | -0.558094 | 1.206001  | -1.275472 |
| C  | -1.722106 | 0.815326  | -1.928653 |
| C  | -2.359114 | 3.164342  | -1.826754 |
| H  | -1.094427 | 4.438921  | -0.649754 |
| H  | -3.497742 | 1.620601  | -2.789335 |
| O  | 0.295261  | 0.150420  | -0.963631 |
| N  | -1.895535 | -0.517053 | -2.118486 |
| N  | -0.100671 | -2.117793 | 0.167679  |
| Al | -0.344549 | -1.771904 | -1.802808 |
| C  | -0.121092 | -3.428693 | 0.643364  |
| C  | -0.308078 | -6.097913 | 1.437613  |
| C  | 1.035426  | -4.113464 | 1.050111  |
| C  | -1.330147 | -4.122286 | 0.600890  |
| C  | -1.446271 | -5.446557 | 0.985165  |
| C  | 0.905710  | -5.434008 | 1.456146  |
| H  | -2.198546 | -3.587052 | 0.257772  |
| H  | 1.788074  | -5.971975 | 1.766777  |
| H  | -0.358154 | -7.128017 | 1.753806  |
| C  | -3.061293 | -0.904287 | -2.805385 |
| C  | -5.368831 | -1.590132 | -4.155772 |
| C  | -3.081067 | -0.858887 | -4.205297 |

|   |           |           |           |
|---|-----------|-----------|-----------|
| C | -4.190220 | -1.331622 | -2.076843 |
| C | -5.363731 | -1.652311 | -2.768765 |
| C | -4.246853 | -1.215205 | -4.861267 |
| H | -4.282082 | -1.184498 | -5.939046 |
| H | -6.277070 | -1.837428 | -4.684069 |
| C | -1.882358 | -0.422156 | -5.004808 |
| H | -1.082617 | -0.201765 | -4.307624 |
| C | -4.078494 | -1.362063 | -0.568095 |
| H | -3.014381 | -1.387676 | -0.361330 |
| C | 2.407149  | -3.503271 | 0.926035  |
| H | 2.291657  | -2.449400 | 0.710939  |
| C | -2.771574 | -6.151498 | 0.900784  |
| H | -3.503649 | -5.418979 | 0.566911  |
| C | -1.394256 | -1.539879 | -5.913183 |
| H | -0.514705 | -1.223022 | -6.468631 |
| H | -2.158827 | -1.826151 | -6.632498 |
| H | -1.126709 | -2.412403 | -5.327058 |
| C | -2.178408 | 0.839172  | -5.803934 |
| H | -1.293126 | 1.167367  | -6.342975 |
| H | -2.495597 | 1.647531  | -5.152914 |
| H | -2.965608 | 0.665880  | -6.534730 |
| C | -4.602345 | -0.075150 | 0.058498  |
| H | -5.664991 | 0.054061  | -0.135086 |
| H | -4.081817 | 0.788659  | -0.337331 |
| H | -4.460440 | -0.091251 | 1.136551  |
| C | -4.680671 | -2.580177 | 0.121061  |
| H | -4.496749 | -3.489989 | -0.442128 |
| H | -5.749265 | -2.493194 | 0.276877  |
| H | -4.224900 | -2.700893 | 1.099651  |
| C | -2.730286 | -7.275011 | -0.124657 |
| H | -2.012664 | -8.035795 | 0.171734  |
| H | -2.432274 | -6.901488 | -1.098288 |
| H | -3.702460 | -7.752945 | -0.221550 |
| C | -3.220682 | -6.679385 | 2.254597  |
| H | -3.274582 | -5.881535 | 2.988226  |
| H | -2.523920 | -7.424774 | 2.628748  |
| H | -4.199706 | -7.147531 | 2.184843  |
| C | 3.228110  | -3.626897 | 2.198664  |
| H | 2.719025  | -3.166745 | 3.039242  |
| H | 4.190980  | -3.136672 | 2.080415  |
| H | 3.420348  | -4.666624 | 2.451258  |
| C | 3.137937  | -4.125500 | -0.257148 |
| H | 4.117289  | -3.670202 | -0.388540 |
| H | 2.569501  | -3.986198 | -1.171037 |
| H | 3.279079  | -5.193371 | -0.105220 |
| C | -6.647024 | -2.040552 | -2.097547 |
| H | -6.626827 | -3.059145 | -1.721152 |



|   |           |           |           |
|---|-----------|-----------|-----------|
| H | -7.465392 | -1.973646 | -2.807066 |
| H | -6.886993 | -1.399217 | -1.257275 |
| C | 1.164038  | -0.084983 | 4.590832  |
| C | 0.892726  | -1.457251 | 5.187077  |
| H | 1.074186  | -1.429010 | 6.258229  |
| H | 1.539544  | -2.217323 | 4.762168  |
| H | -0.135622 | -1.765817 | 5.029513  |
| C | 0.260255  | 0.917743  | 5.304938  |
| H | 0.430627  | 0.881365  | 6.379048  |
| H | -0.784719 | 0.690534  | 5.117618  |
| H | 0.442448  | 1.933139  | 4.972514  |
| C | -3.315010 | 4.298516  | -2.169101 |
| C | -2.566642 | 5.366429  | -2.964293 |
| H | -1.730678 | 5.766206  | -2.401032 |
| H | -3.231637 | 6.190199  | -3.217167 |
| H | -2.174777 | 4.948921  | -3.886927 |
| C | -3.861062 | 4.921323  | -0.886026 |
| H | -3.067075 | 5.323180  | -0.266811 |
| H | -4.395200 | 4.179908  | -0.299631 |
| H | -4.548346 | 5.732002  | -1.120274 |
| C | -4.498670 | 3.836500  | -3.004630 |
| H | -4.179305 | 3.399234  | -3.945142 |
| H | -5.136668 | 4.686831  | -3.230715 |
| H | -5.098411 | 3.100302  | -2.479492 |
| C | 2.623458  | 0.270964  | 4.867523  |
| H | 2.828770  | 0.244497  | 5.936178  |
| H | 2.862871  | 1.262901  | 4.499803  |
| H | 3.286265  | -0.434124 | 4.374782  |

**dipp\_caac\_B97M\_D3\_TZVPP\_optfreq**

|                            |                        |
|----------------------------|------------------------|
| Total correction:          | 1298.8758 kJ/mol       |
| Single point energy:       | -2196405.6075 kJ/mol   |
| Total enthalpy:            | -2195104.2527 kJ/mol   |
| Final entropy term:        | 184.9048 kJ/mol        |
| Total gibbs free enthalpy: | -2195289.1576 kJ/mol   |
| Method and Basis:          | B97M-D3BJ / def2-TZVPP |

xyz, charge: 0, multiplicity: 1

|   |           |           |          |
|---|-----------|-----------|----------|
| C | -0.712336 | -0.492345 | 1.640589 |
| C | 0.569440  | 0.167547  | 2.086035 |
| N | 0.217252  | 1.188984  | 2.810161 |
| C | -1.266664 | 1.449481  | 3.024701 |
| C | -1.846254 | 0.485437  | 1.999896 |
| H | -2.146951 | 1.036216  | 1.113201 |
| H | -2.728181 | -0.018459 | 2.381398 |

|   |           |           |           |
|---|-----------|-----------|-----------|
| C | -0.662492 | -0.775778 | 0.150085  |
| H | 0.158473  | -1.444516 | -0.083339 |
| H | -0.517760 | 0.139856  | -0.415856 |
| H | -1.590434 | -1.234675 | -0.182802 |
| C | -0.824183 | -1.810924 | 2.399474  |
| H | 0.032747  | -2.441540 | 2.190759  |
| H | -1.725320 | -2.338828 | 2.098648  |
| H | -0.867557 | -1.657117 | 3.472964  |
| C | -1.629361 | 2.894463  | 2.755940  |
| H | -1.430673 | 3.178770  | 1.731265  |
| H | -1.090181 | 3.567984  | 3.413602  |
| H | -2.690316 | 3.032134  | 2.937899  |
| C | -1.657892 | 1.112956  | 4.451586  |
| H | -1.506142 | 0.066213  | 4.680326  |
| H | -2.709482 | 1.337726  | 4.596584  |
| H | -1.091108 | 1.706984  | 5.160311  |
| C | 1.187904  | 2.036291  | 3.437881  |
| C | 2.982327  | 3.729344  | 4.670848  |
| C | 1.694007  | 1.691119  | 4.692160  |
| C | 1.635012  | 3.167969  | 2.753131  |
| C | 2.529208  | 4.011139  | 3.397517  |
| C | 2.585661  | 2.566195  | 5.298465  |
| H | 2.890109  | 4.887115  | 2.886627  |
| H | 2.991078  | 2.319199  | 6.264477  |
| H | 3.670736  | 4.398197  | 5.159373  |
| C | 1.294947  | 3.412365  | 1.306474  |
| H | 0.460430  | 2.776867  | 1.040103  |
| C | 0.906173  | 4.851250  | 1.015656  |
| H | 0.085406  | 5.179703  | 1.645046  |
| H | 0.602023  | 4.956137  | -0.021323 |
| H | 1.737553  | 5.530341  | 1.175686  |
| C | 2.472223  | 2.976338  | 0.441823  |
| H | 3.355475  | 3.565089  | 0.673736  |
| H | 2.243893  | 3.111089  | -0.611793 |
| H | 2.704274  | 1.931099  | 0.614071  |
| C | 1.427582  | 0.351160  | 5.325284  |
| H | 0.590195  | -0.105965 | 4.817167  |
| C | 1.093261  | 0.438311  | 6.804212  |
| H | 1.933966  | 0.806666  | 7.383587  |
| H | 0.844046  | -0.545143 | 7.190649  |
| H | 0.250989  | 1.097143  | 6.989697  |
| C | 2.632203  | -0.553128 | 5.090835  |
| H | 3.518590  | -0.140228 | 5.564729  |
| H | 2.827234  | -0.656780 | 4.029397  |
| H | 2.455398  | -1.540477 | 5.508327  |

**dipp\_cnc\_sncl\_B97M\_D3\_TZVPP\_optfreq**

|                            |                        |
|----------------------------|------------------------|
| Total correction:          | 1855.0072 kJ/mol       |
| Single point energy:       | -5032447.3356 kJ/mol   |
| Total enthalpy:            | -5030589.8495 kJ/mol   |
| Final entropy term:        | 263.0695 kJ/mol        |
| Total gibbs free enthalpy: | -5030852.919 kJ/mol    |
| Method and Basis:          | B97M-D3BJ / def2-TZVPP |

xyz, charge: 0, multiplicity: 1

|    |           |           |           |
|----|-----------|-----------|-----------|
| N  | 0.770739  | 1.251775  | 2.266860  |
| Sn | 2.017439  | -0.540098 | 2.784476  |
| C  | -0.171313 | 1.027986  | 3.176781  |
| N  | 0.130326  | -0.055932 | 3.892699  |
| C  | -1.351615 | 1.948444  | 3.486895  |
| C  | -1.406844 | 3.187413  | 2.604593  |
| H  | -0.487684 | 3.757007  | 2.638084  |
| H  | -2.206073 | 3.821036  | 2.975675  |
| H  | -1.621113 | 2.957295  | 1.570154  |
| C  | -2.694726 | 1.232800  | 3.369524  |
| H  | -2.786294 | 0.410540  | 4.063025  |
| H  | -2.867982 | 0.863462  | 2.364789  |
| H  | -3.480592 | 1.947653  | 3.593738  |
| C  | -1.169563 | 2.422957  | 4.930016  |
| H  | -0.196775 | 2.882225  | 5.073094  |
| H  | -1.274240 | 1.610791  | 5.632839  |
| H  | -1.930578 | 3.163847  | 5.153414  |
| C  | -0.634860 | -0.765766 | 4.834823  |
| C  | -2.061164 | -2.285985 | 6.673837  |
| C  | -1.577175 | -1.707844 | 4.384980  |
| C  | -0.354956 | -0.646097 | 6.203271  |
| C  | -1.090882 | -1.404601 | 7.103142  |
| C  | -2.285569 | -2.445202 | 5.319773  |
| H  | -0.887427 | -1.310711 | 8.156187  |
| H  | -3.016450 | -3.160771 | 4.984629  |
| H  | -2.624525 | -2.863143 | 7.387301  |
| C  | 0.800825  | 2.082596  | 1.135002  |
| C  | 1.060265  | 3.575707  | -1.192563 |
| C  | 1.705283  | 3.149093  | 1.092200  |
| C  | 0.021290  | 1.763080  | 0.010356  |
| C  | 0.166454  | 2.522268  | -1.138779 |
| C  | 1.817500  | 3.881320  | -0.081348 |
| H  | -0.426871 | 2.288568  | -2.005724 |
| H  | 2.511271  | 4.704498  | -0.119479 |
| H  | 1.161737  | 4.153183  | -2.095679 |
| C  | -0.938872 | 0.604074  | 0.037804  |
| H  | -1.224694 | 0.439496  | 1.069168  |

|    |           |           |           |
|----|-----------|-----------|-----------|
| C  | -0.263516 | -0.669111 | -0.451839 |
| H  | 0.051732  | -0.555938 | -1.485197 |
| H  | -0.941211 | -1.516608 | -0.393820 |
| H  | 0.618895  | -0.905492 | 0.135175  |
| C  | -2.220738 | 0.855611  | -0.736427 |
| H  | -2.044785 | 0.905124  | -1.806158 |
| H  | -2.693569 | 1.784488  | -0.433722 |
| H  | -2.923532 | 0.045933  | -0.564549 |
| C  | 2.554031  | 3.516158  | 2.278713  |
| H  | 2.267538  | 2.878485  | 3.106081  |
| C  | 4.025119  | 3.259806  | 1.986295  |
| H  | 4.630277  | 3.457415  | 2.865050  |
| H  | 4.374389  | 3.899091  | 1.179504  |
| H  | 4.196724  | 2.229084  | 1.696368  |
| C  | 2.343585  | 4.962466  | 2.702645  |
| H  | 2.926050  | 5.181825  | 3.592202  |
| H  | 1.301062  | 5.168834  | 2.924093  |
| H  | 2.657542  | 5.654028  | 1.926273  |
| C  | 0.784277  | 0.200463  | 6.702527  |
| H  | 1.103132  | 0.848868  | 5.895076  |
| C  | 1.956432  | -0.708116 | 7.053593  |
| H  | 2.827115  | -0.123838 | 7.332077  |
| H  | 2.238268  | -1.333360 | 6.213650  |
| H  | 1.693700  | -1.359263 | 7.883473  |
| C  | 0.422895  | 1.065384  | 7.898961  |
| H  | 1.261106  | 1.703199  | 8.161031  |
| H  | 0.191669  | 0.463696  | 8.772683  |
| H  | -0.433017 | 1.700884  | 7.699188  |
| C  | -1.761284 | -1.985870 | 2.916174  |
| H  | -1.407435 | -1.123483 | 2.364565  |
| C  | -3.204136 | -2.230614 | 2.509540  |
| H  | -3.857966 | -1.432019 | 2.841810  |
| H  | -3.583104 | -3.162656 | 2.916447  |
| H  | -3.278462 | -2.301841 | 1.428404  |
| C  | -0.896324 | -3.173987 | 2.511582  |
| H  | 0.149932  | -3.004871 | 2.747283  |
| H  | -0.973416 | -3.367989 | 1.445572  |
| H  | -1.211111 | -4.066993 | 3.044044  |
| Cl | 3.452451  | 0.671793  | 4.277701  |

**gade\_tol\_sn\_B97M\_D3\_TZVPP\_optfreq**

|                      |                      |
|----------------------|----------------------|
| Total correction:    | 1793.2969 kJ/mol     |
| Single point energy: | -6907356.5888 kJ/mol |
| Total enthalpy:      | -6905560.8128 kJ/mol |
| Final entropy term:  | 310.1679 kJ/mol      |

Total gibbs free enthalpy:

-6905870.9808 kJ/mol

Method and Basis:

B97M-D3BJ / def2-TZVPP

xyz, charge: -1, multiplicity: 1

|   |           |           |           |
|---|-----------|-----------|-----------|
| C | 1.438848  | 2.552618  | 0.497423  |
| C | 1.343245  | 3.638034  | -0.387741 |
| H | 1.372284  | 4.636327  | 0.018316  |
| C | 1.245169  | 3.453600  | -1.753509 |
| H | 1.177881  | 4.318649  | -2.397166 |
| C | 1.250598  | 2.186658  | -2.320313 |
| C | 1.355117  | 1.105039  | -1.454083 |
| H | 1.358511  | 0.103567  | -1.860257 |
| C | 1.437174  | 1.276673  | -0.086494 |
| H | 1.482674  | 0.413954  | 0.557916  |
| C | 1.112094  | 1.992328  | -3.795517 |
| H | 0.071615  | 1.864467  | -4.094559 |
| H | 1.648909  | 1.110486  | -4.134822 |
| H | 1.496345  | 2.847020  | -4.345073 |
| C | 1.652466  | 0.339370  | 3.662367  |
| H | 0.755159  | 0.647900  | 4.188394  |
| H | 2.305207  | -0.163397 | 4.373279  |
| H | 1.363523  | -0.387260 | 2.905315  |
| C | 4.022888  | 1.190882  | 1.987430  |
| H | 3.788321  | 0.429054  | 1.250127  |
| H | 4.728148  | 0.763763  | 2.697089  |
| H | 4.521666  | 2.006941  | 1.472751  |
| C | 4.796897  | 2.940452  | 5.389722  |
| H | 5.611923  | 2.730228  | 4.703226  |
| H | 4.654792  | 2.064791  | 6.016431  |
| H | 5.104251  | 3.762121  | 6.030202  |
| C | -1.133987 | 2.791569  | 4.947591  |
| C | -1.790601 | 3.013431  | 6.166945  |
| H | -1.356181 | 3.706158  | 6.869110  |
| C | -2.989395 | 2.396235  | 6.468100  |
| H | -3.462946 | 2.599974  | 7.417910  |
| C | -3.614223 | 1.538849  | 5.571901  |
| C | -2.980879 | 1.323627  | 4.354731  |
| H | -3.437946 | 0.664560  | 3.630882  |
| C | -1.773571 | 1.920376  | 4.050294  |
| H | -1.293668 | 1.709663  | 3.108075  |
| C | -4.901081 | 0.858031  | 5.909101  |
| H | -4.748013 | -0.174198 | 6.223935  |
| H | -5.575181 | 0.829760  | 5.056721  |
| H | -5.414448 | 1.366130  | 6.720275  |
| C | 1.327062  | 2.336825  | 7.066630  |
| H | 0.484691  | 2.416785  | 7.747038  |
| H | 2.239719  | 2.406493  | 7.654550  |

|    |           |           |          |
|----|-----------|-----------|----------|
| H  | 1.296016  | 1.348992  | 6.616265 |
| C  | 1.272180  | 5.324147  | 6.601039 |
| H  | 1.250399  | 6.130401  | 5.875452 |
| H  | 2.147868  | 5.461449  | 7.232400 |
| H  | 0.390235  | 5.417995  | 7.231894 |
| C  | 1.121195  | 6.992468  | 3.063088 |
| C  | -0.089354 | 7.305912  | 3.699272 |
| H  | -0.617913 | 6.520824  | 4.215685 |
| C  | -0.601710 | 8.589920  | 3.691842 |
| H  | -1.539459 | 8.784084  | 4.191640 |
| C  | 0.063998  | 9.636829  | 3.071558 |
| C  | 1.266623  | 9.338329  | 2.440298 |
| H  | 1.803959  | 10.125986 | 1.931247 |
| C  | 1.779091  | 8.057218  | 2.426474 |
| H  | 2.692375  | 7.853071  | 1.891726 |
| C  | -0.474877 | 11.030562 | 3.093855 |
| H  | 0.058404  | 11.664932 | 3.801603 |
| H  | -1.522290 | 11.041611 | 3.379660 |
| H  | -0.392878 | 11.508974 | 2.120571 |
| C  | 4.161437  | 6.613479  | 4.223592 |
| H  | 4.260155  | 7.560401  | 3.701545 |
| H  | 5.160900  | 6.263034  | 4.471924 |
| H  | 3.633860  | 6.801951  | 5.154006 |
| C  | 4.184448  | 5.128475  | 1.591761 |
| H  | 3.698293  | 4.395563  | 0.956679 |
| H  | 5.208102  | 4.801296  | 1.763325 |
| H  | 4.224024  | 6.069965  | 1.047028 |
| N  | 1.505903  | 2.755440  | 1.857997 |
| N  | 0.051732  | 3.405381  | 4.610186 |
| N  | 1.596903  | 5.700140  | 3.046478 |
| Si | 2.506749  | 1.824836  | 2.901499 |
| Si | 1.328630  | 3.662924  | 5.733347 |
| Si | 3.262330  | 5.305950  | 3.214681 |
| Si | 3.208303  | 3.369801  | 4.448491 |
| Sn | 0.085188  | 4.213961  | 2.599105 |

**iPr\_NHC\_B97M\_D3\_TZVPP\_optfreq**

|                            |                        |
|----------------------------|------------------------|
| Total correction:          | 1592.3559 kJ/mol       |
| Single point energy:       | -3049451.8114 kJ/mol   |
| Total enthalpy:            | -3047856.9764 kJ/mol   |
| Final entropy term:        | 222.8927 kJ/mol        |
| Total gibbs free enthalpy: | -3048079.869 kJ/mol    |
| Method and Basis:          | B97M-D3BJ / def2-TZVPP |

xyz, charge: 0, multiplicity: 1

|   |           |           |           |
|---|-----------|-----------|-----------|
| N | -0.698174 | 0.842655  | 1.111872  |
| C | 0.509529  | 1.213088  | 1.619677  |
| N | 0.133009  | 1.910611  | 2.726631  |
| C | -1.238845 | 1.967178  | 2.898740  |
| C | -1.769893 | 1.290497  | 1.863992  |
| H | -1.693008 | 2.473412  | 3.723974  |
| H | -2.784635 | 1.087606  | 1.594367  |
| C | -0.853213 | 0.095849  | -0.090058 |
| C | -1.168622 | -1.343728 | -2.404256 |
| C | -0.752951 | 0.760662  | -1.308370 |
| C | -1.107094 | -1.273379 | 0.002293  |
| C | -1.267861 | -1.979750 | -1.180066 |
| C | -0.909119 | 0.009881  | -2.466730 |
| H | -1.465248 | -3.036288 | -1.147038 |
| H | -0.826507 | 0.493037  | -3.425109 |
| H | -1.292492 | -1.909016 | -3.312672 |
| C | 1.053561  | 2.497757  | 3.639830  |
| C | 2.817960  | 3.635595  | 5.406305  |
| C | 1.673823  | 1.682749  | 4.581692  |
| C | 1.292333  | 3.870386  | 3.557643  |
| C | 2.183859  | 4.424460  | 4.463592  |
| C | 2.568790  | 2.279727  | 5.460721  |
| H | 2.391877  | 5.478939  | 4.429632  |
| H | 3.072959  | 1.673859  | 6.193937  |
| H | 3.510819  | 4.082671  | 6.099304  |
| C | -0.432389 | 2.228926  | -1.389895 |
| H | -0.567225 | 2.658915  | -0.402637 |
| C | -1.347801 | 2.973135  | -2.348483 |
| H | -2.393364 | 2.827034  | -2.096842 |
| H | -1.204295 | 2.648486  | -3.374460 |
| H | -1.136764 | 4.037593  | -2.315196 |
| C | 1.028545  | 2.413743  | -1.777619 |
| H | 1.678550  | 1.929525  | -1.057815 |
| H | 1.284648  | 3.468302  | -1.819932 |
| H | 1.218456  | 1.980945  | -2.756392 |
| C | -1.116391 | -1.963521 | 1.341348  |
| H | -1.501478 | -1.261994 | 2.076160  |
| C | -1.994245 | -3.200424 | 1.384273  |
| H | -3.003509 | -2.993060 | 1.043072  |
| H | -2.050916 | -3.578175 | 2.400014  |
| H | -1.590848 | -3.999842 | 0.770219  |
| C | 0.313881  | -2.308305 | 1.742880  |
| H | 0.945196  | -1.427760 | 1.739599  |
| H | 0.733580  | -3.027643 | 1.044501  |
| H | 0.338131  | -2.748950 | 2.735927  |
| C | 0.666701  | 4.694057  | 2.462378  |
| H | -0.309978 | 4.272046  | 2.242825  |

|   |           |           |          |
|---|-----------|-----------|----------|
| C | 1.511139  | 4.576613  | 1.197914 |
| H | 2.495723  | 5.004997  | 1.366261 |
| H | 1.046822  | 5.112231  | 0.374250 |
| H | 1.640077  | 3.540567  | 0.908111 |
| C | 0.462680  | 6.150741  | 2.834904 |
| H | 1.407927  | 6.674923  | 2.937781 |
| H | -0.082298 | 6.257608  | 3.767437 |
| H | -0.097865 | 6.656362  | 2.055297 |
| C | 1.436395  | 0.197340  | 4.630578 |
| H | 0.570882  | -0.026422 | 4.015575 |
| C | 1.145308  | -0.297688 | 6.038172 |
| H | 0.309750  | 0.233319  | 6.482840 |
| H | 2.002965  | -0.174778 | 6.692377 |
| H | 0.903144  | -1.355889 | 6.019378 |
| C | 2.629154  | -0.534704 | 4.030735 |
| H | 2.795495  | -0.219287 | 3.007028 |
| H | 2.464810  | -1.608202 | 4.038663 |
| H | 3.529195  | -0.327177 | 4.603603 |

#### iPr\_NHSn\_B97M\_D3\_TZVPP\_optfreq

|                            |                        |
|----------------------------|------------------------|
| Total correction:          | 1577.514 kJ/mol        |
| Single point energy:       | -3512414.6779 kJ/mol   |
| Total enthalpy:            | -3510834.6849 kJ/mol   |
| Final entropy term:        | 239.2382 kJ/mol        |
| Total gibbs free enthalpy: | -3511073.9231 kJ/mol   |
| Method and Basis:          | B97M-D3BJ / def2-TZVPP |

xyz, charge: 0, multiplicity: 1

|    |           |           |           |
|----|-----------|-----------|-----------|
| N  | -0.304608 | 0.590122  | 0.755046  |
| Sn | 1.693699  | 0.896444  | 1.266522  |
| N  | 0.660511  | 1.845190  | 2.809855  |
| C  | -0.699951 | 1.784512  | 2.705151  |
| C  | -1.204936 | 1.127469  | 1.630097  |
| H  | -1.311026 | 2.250824  | 3.458340  |
| H  | -2.258690 | 1.017631  | 1.441042  |
| C  | -0.773076 | -0.064861 | -0.408381 |
| C  | -1.552912 | -1.361345 | -2.724478 |
| C  | -0.975087 | 0.678329  | -1.577030 |
| C  | -0.982453 | -1.447876 | -0.383798 |
| C  | -1.367491 | -2.078475 | -1.558803 |
| C  | -1.361090 | 0.006488  | -2.728335 |
| H  | -1.520128 | -3.144649 | -1.561298 |
| H  | -1.508161 | 0.560895  | -3.640004 |
| H  | -1.848625 | -1.867372 | -3.628035 |
| C  | 1.242193  | 2.566401  | 3.879312  |



|   |           |           |           |
|---|-----------|-----------|-----------|
| C | 2.508033  | 3.954885  | 5.909974  |
| C | 1.600761  | 1.892753  | 5.051786  |
| C | 1.489251  | 3.935482  | 3.725432  |
| C | 2.129597  | 4.610833  | 4.754805  |
| C | 2.240997  | 2.607630  | 6.054675  |
| H | 2.339500  | 5.661842  | 4.647756  |
| H | 2.536367  | 2.102001  | 6.958559  |
| H | 3.008136  | 4.493599  | 6.697164  |
| C | -0.739712 | 2.165780  | -1.613973 |
| H | -0.641223 | 2.511976  | -0.590626 |
| C | -1.898600 | 2.919313  | -2.247078 |
| H | -2.836259 | 2.690650  | -1.751643 |
| H | -2.010117 | 2.672776  | -3.298620 |
| H | -1.732404 | 3.990341  | -2.181438 |
| C | 0.562319  | 2.478472  | -2.339187 |
| H | 1.405466  | 1.983756  | -1.865497 |
| H | 0.757500  | 3.547152  | -2.344266 |
| H | 0.518408  | 2.138680  | -3.370388 |
| C | -0.756963 | -2.253861 | 0.868212  |
| H | -0.668709 | -1.559026 | 1.696541  |
| C | -1.914729 | -3.191711 | 1.170633  |
| H | -2.854876 | -2.653313 | 1.227372  |
| H | -1.754324 | -3.694961 | 2.119321  |
| H | -2.017667 | -3.959965 | 0.410305  |
| C | 0.549636  | -3.029707 | 0.768716  |
| H | 1.391067  | -2.363297 | 0.601331  |
| H | 0.516295  | -3.731487 | -0.060275 |
| H | 0.739350  | -3.591613 | 1.678864  |
| C | 1.118114  | 4.664399  | 2.460361  |
| H | 0.467643  | 4.017082  | 1.882114  |
| C | 2.360708  | 4.942161  | 1.624857  |
| H | 3.051989  | 5.582352  | 2.166205  |
| H | 2.100017  | 5.438214  | 0.694174  |
| H | 2.885273  | 4.022538  | 1.381715  |
| C | 0.360297  | 5.953125  | 2.736385  |
| H | 0.980020  | 6.679302  | 3.253662  |
| H | -0.517954 | 5.771866  | 3.346926  |
| H | 0.037908  | 6.407879  | 1.804578  |
| C | 1.344238  | 0.418189  | 5.218780  |
| H | 0.654605  | 0.113238  | 4.438794  |
| C | 0.705903  | 0.087318  | 6.558390  |
| H | -0.203818 | 0.657301  | 6.714628  |
| H | 1.376534  | 0.299295  | 7.385554  |
| H | 0.457253  | -0.968524 | 6.606465  |
| C | 2.635639  | -0.367046 | 5.033206  |
| H | 3.073947  | -0.179342 | 4.057105  |
| H | 2.458774  | -1.435034 | 5.124144  |

H 3.368291 -0.080968 5.783036

**boryl\_li\_thf2\_B97M\_D3\_TZVPP\_optfreq**

Total correction: 2260.2654 kJ/mol  
Single point energy: -4256791.2991 kJ/mol  
Total enthalpy: -4254528.5546 kJ/mol  
Final entropy term: 296.8922 kJ/mol  
Total gibbs free enthalpy: -4254825.4467 kJ/mol  
Method and Basis: B97M-D3BJ / def2-TZVPP

xyz, charge: 0, multiplicity: 1

B 1.027853 1.956075 3.435961  
N 1.088029 3.419834 3.517284  
C 2.395416 3.888038 3.472468  
H 2.632863 4.933140 3.511733  
C 3.222467 2.834204 3.355835  
H 4.292553 2.817909 3.291192  
N 2.457819 1.673390 3.311364  
Li -0.839844 0.753407 3.602372  
C 0.013001 4.301311 3.737422  
C -0.161607 4.870195 5.005244  
C -1.226731 5.739075 5.202188  
H -1.377699 6.185593 6.169422  
C -2.105170 6.030301 4.176495  
H -2.926215 6.707340 4.344984  
C -1.932420 5.448130 2.935057  
H -2.624706 5.679389 2.144332  
C -0.879370 4.576936 2.692865  
C 0.723338 4.459487 6.154780  
H 1.705780 4.232252 5.755978  
C 0.890612 5.533752 7.213504  
H 1.212132 6.477000 6.783195  
H 1.634083 5.223283 7.940916  
H -0.031684 5.712715 7.758970  
C 0.180738 3.178230 6.778667  
H -0.809324 3.351734 7.195165  
H 0.828116 2.836161 7.581793  
H 0.110874 2.388160 6.037369  
C -0.665309 3.962856 1.334744  
H -0.278878 2.961591 1.504716  
C 0.395066 4.739594 0.564421  
H 0.068308 5.762716 0.393829  
H 0.582021 4.280194 -0.402535  
H 1.330678 4.767996 1.110455  
C -1.935413 3.838763 0.515563

|   |           |           |           |
|---|-----------|-----------|-----------|
| H | -2.719872 | 3.327955  | 1.068094  |
| H | -1.738774 | 3.272237  | -0.389396 |
| H | -2.322398 | 4.806397  | 0.208005  |
| C | 3.083201  | 0.412464  | 3.364986  |
| C | 3.245647  | -0.338898 | 2.193138  |
| C | 3.860628  | -1.579504 | 2.284621  |
| H | 3.995003  | -2.174594 | 1.398108  |
| C | 4.313683  | -2.064718 | 3.498713  |
| H | 4.791676  | -3.028984 | 3.548508  |
| C | 4.148714  | -1.312636 | 4.643743  |
| H | 4.490537  | -1.699322 | 5.589889  |
| C | 3.529275  | -0.070193 | 4.597875  |
| C | 2.797402  | 0.221982  | 0.868079  |
| H | 1.881822  | 0.778544  | 1.055389  |
| C | 3.829540  | 1.207339  | 0.330395  |
| H | 3.990557  | 2.026365  | 1.018944  |
| H | 3.501953  | 1.624071  | -0.618197 |
| H | 4.779482  | 0.704214  | 0.167191  |
| C | 2.512689  | -0.836613 | -0.181616 |
| H | 2.063226  | -0.377942 | -1.056531 |
| H | 1.835966  | -1.604767 | 0.179529  |
| H | 3.423174  | -1.328569 | -0.512497 |
| C | 3.300267  | 0.700162  | 5.871960  |
| H | 2.883237  | 1.664554  | 5.607882  |
| C | 4.594310  | 0.940454  | 6.632512  |
| H | 5.047984  | 0.007576  | 6.955566  |
| H | 4.407674  | 1.538369  | 7.519859  |
| H | 5.317996  | 1.465385  | 6.017524  |
| C | 2.280315  | -0.016184 | 6.745031  |
| H | 1.333966  | -0.111599 | 6.221665  |
| H | 2.101858  | 0.535801  | 7.663397  |
| H | 2.623408  | -1.012388 | 7.012751  |
| O | -1.034180 | -1.133846 | 3.272463  |
| C | -0.233488 | -1.623650 | 2.172238  |
| H | 0.466912  | -0.839133 | 1.903532  |
| H | -0.898603 | -1.817357 | 1.338111  |
| C | 0.477216  | -2.849036 | 2.694760  |
| H | -0.145038 | -3.733560 | 2.585623  |
| H | 1.417694  | -3.020607 | 2.187363  |
| C | 0.658098  | -2.492860 | 4.160203  |
| H | 0.858984  | -3.347860 | 4.794139  |
| H | 1.470335  | -1.783127 | 4.267844  |
| C | -0.659142 | -1.830993 | 4.476073  |
| H | -1.436459 | -2.555529 | 4.713726  |
| H | -0.604281 | -1.104468 | 5.281585  |
| O | -2.570381 | 1.175814  | 4.256931  |
| C | -3.766925 | 0.490253  | 3.895685  |

|   |           |           |          |
|---|-----------|-----------|----------|
| H | -4.265330 | 0.138859  | 4.800968 |
| H | -3.485948 | -0.361492 | 3.292001 |
| C | -4.587485 | 1.544336  | 3.187803 |
| H | -5.647866 | 1.321748  | 3.195878 |
| H | -4.269762 | 1.618894  | 2.152889 |
| C | -4.235878 | 2.826879  | 3.953272 |
| H | -4.032147 | 3.649526  | 3.280727 |
| H | -5.039817 | 3.133411  | 4.612143 |
| C | -2.989270 | 2.455819  | 4.755326 |
| H | -2.162729 | 3.137546  | 4.628693 |
| H | -3.209425 | 2.354071  | 5.816314 |

### sn2\_cxet\_C2\_sym\_B97M\_D3\_TZVPP\_opt\_freq

|                            |                        |
|----------------------------|------------------------|
| Total correction:          | 2137.4583 kJ/mol       |
| Single point energy:       | -4821002.9493 kJ/mol   |
| Total enthalpy:            | -4818863.0121 kJ/mol   |
| Final entropy term:        | 282.2566 kJ/mol        |
| Total gibbs free enthalpy: | -4819145.2687 kJ/mol   |
| Method and Basis:          | B97M-D3BJ / def2-TZVPP |

xyz, charge: -2, multiplicity: 1

|   |           |           |           |
|---|-----------|-----------|-----------|
| N | -0.124733 | 0.339902  | 0.321157  |
| C | 0.821571  | -0.652542 | 0.286980  |
| C | 0.313432  | -1.782488 | 0.901857  |
| C | -0.988584 | -1.459847 | 1.343478  |
| C | -1.229801 | -0.151528 | 0.964979  |
| H | 0.821783  | -2.718132 | 1.049424  |
| H | -1.636466 | -2.094931 | 1.919190  |
| C | 2.165924  | -0.497418 | -0.379633 |
| C | 3.171917  | -1.429218 | 0.321539  |
| H | 4.124010  | -1.357686 | -0.197193 |
| H | 2.828684  | -2.452148 | 0.174928  |
| C | 3.387571  | -1.176302 | 1.801180  |
| H | 3.729610  | -0.162754 | 1.973068  |
| H | 4.133365  | -1.861703 | 2.204322  |
| H | 2.465300  | -1.313313 | 2.353331  |
| C | 2.030952  | -0.997081 | -1.846672 |
| H | 1.179158  | -0.495159 | -2.294938 |
| H | 1.770763  | -2.055723 | -1.804167 |
| C | 3.239330  | -0.778991 | -2.734545 |
| H | 3.481077  | 0.276247  | -2.798548 |
| H | 3.043530  | -1.147002 | -3.740598 |
| H | 4.125001  | -1.290903 | -2.365561 |
| C | 2.693909  | 0.913328  | -0.345603 |
| C | 4.006533  | 1.316688  | -0.174640 |

|   |           |           |           |
|---|-----------|-----------|-----------|
| C | 4.024090  | 2.722721  | -0.285580 |
| C | 2.722564  | 3.122547  | -0.535831 |
| N | 1.914542  | 2.020794  | -0.567235 |
| H | 4.854877  | 0.684490  | 0.012527  |
| H | 4.882424  | 3.358640  | -0.168243 |
| C | 2.167188  | 4.520258  | -0.500934 |
| C | 1.625470  | 4.719684  | 0.945219  |
| H | 0.979009  | 3.872703  | 1.153556  |
| H | 2.472369  | 4.640886  | 1.628622  |
| C | 0.850964  | 5.998898  | 1.189192  |
| H | 0.532159  | 6.056715  | 2.228531  |
| H | -0.032498 | 6.036829  | 0.561654  |
| H | 1.442232  | 6.887013  | 0.977492  |
| C | 3.294010  | 5.529716  | -0.743070 |
| H | 2.887231  | 6.530402  | -0.624220 |
| H | 4.028875  | 5.404755  | 0.050747  |
| C | 3.984277  | 5.427576  | -2.091632 |
| H | 4.462209  | 4.462588  | -2.209745 |
| H | 4.744597  | 6.201573  | -2.198415 |
| H | 3.272360  | 5.539055  | -2.900735 |
| C | -2.304969 | 0.777393  | 1.452588  |
| C | -1.642916 | 1.728566  | 2.492570  |
| H | -2.434779 | 2.333883  | 2.936375  |
| H | -1.009974 | 2.409106  | 1.931358  |
| C | -3.410093 | -0.018740 | 2.154260  |
| H | -4.082313 | 0.693870  | 2.629756  |
| H | -2.959285 | -0.592976 | 2.959205  |
| C | -4.210320 | -0.951262 | 1.262392  |
| H | -4.723607 | -0.397424 | 0.485584  |
| H | -4.954306 | -1.498731 | 1.841470  |
| H | -3.563979 | -1.671612 | 0.775244  |
| C | -0.810237 | 1.056700  | 3.565466  |
| H | 0.019199  | 0.515713  | 3.123702  |
| H | -1.388235 | 0.347564  | 4.153911  |
| H | -0.405113 | 1.798926  | 4.251147  |
| C | -2.912433 | 1.677307  | 0.411156  |
| N | -2.151199 | 2.335257  | -0.513633 |
| C | -2.950060 | 3.251456  | -1.150353 |
| C | -4.228259 | 3.171516  | -0.626347 |
| C | -4.202848 | 2.177419  | 0.373980  |
| H | -5.081490 | 3.755307  | -0.919008 |
| H | -5.024406 | 1.888601  | 1.003677  |
| C | 1.022918  | 4.790285  | -1.435914 |
| C | 0.764452  | 5.934097  | -2.169341 |
| C | -0.579625 | 5.854622  | -2.595464 |
| C | -1.093063 | 4.674118  | -2.089746 |
| N | -0.111088 | 4.022918  | -1.387442 |

|    |           |          |           |
|----|-----------|----------|-----------|
| H  | 1.432098  | 6.759676 | -2.334166 |
| H  | -1.108650 | 6.591405 | -3.172409 |
| C  | -2.479572 | 4.115467 | -2.291450 |
| C  | -3.459545 | 5.289513 | -2.474135 |
| H  | -4.446320 | 4.883719 | -2.680567 |
| H  | -3.163421 | 5.825487 | -3.374416 |
| C  | -2.481984 | 3.312120 | -3.623912 |
| H  | -2.276550 | 4.020047 | -4.428242 |
| H  | -1.641120 | 2.625890 | -3.604590 |
| C  | -3.740871 | 2.521006 | -3.915813 |
| H  | -4.624482 | 3.152006 | -3.975881 |
| H  | -3.921201 | 1.789549 | -3.135811 |
| H  | -3.648273 | 1.994322 | -4.864513 |
| C  | -3.549956 | 6.263263 | -1.315008 |
| H  | -3.852097 | 5.755644 | -0.406866 |
| H  | -4.277124 | 7.047471 | -1.526596 |
| H  | -2.589847 | 6.730551 | -1.130285 |
| Sn | -0.161069 | 1.773153 | -1.413187 |

#### se\_me2\_B97M\_TZVPP\_optfreq

|                            |                        |
|----------------------------|------------------------|
| Total correction:          | 210.9131 kJ/mol        |
| Single point energy:       | -6514382.6723 kJ/mol   |
| Total enthalpy:            | -6514169.2802 kJ/mol   |
| Final entropy term:        | 90.8452 kJ/mol         |
| Total gibbs free enthalpy: | -6514260.1254 kJ/mol   |
| Method and Basis:          | B97M-D3BJ / def2-TZVPP |

xyz, charge: 0, multiplicity: 1

|    |           |           |           |
|----|-----------|-----------|-----------|
| Se | 0.212154  | -0.948711 | 0.849987  |
| C  | 1.765040  | -0.005770 | 1.519983  |
| H  | 2.610990  | -0.161371 | 0.863089  |
| H  | 1.992476  | -0.410668 | 2.497021  |
| H  | 1.551744  | 1.051257  | 1.612318  |
| C  | 0.097787  | -0.005328 | -0.837178 |
| H  | 0.999770  | -0.159013 | -1.415232 |
| H  | -0.062407 | 1.051409  | -0.666828 |
| H  | -0.746382 | -0.411804 | -1.377963 |

#### sn2\_py2\_B97M\_D3\_TZVPP\_optfreq

|                            |                      |
|----------------------------|----------------------|
| Total correction:          | 406.6968 kJ/mol      |
| Single point energy:       | -1664672.2335 kJ/mol |
| Total enthalpy:            | -1664263.0576 kJ/mol |
| Final entropy term:        | 127.4968 kJ/mol      |
| Total gibbs free enthalpy: | -1664390.5544 kJ/mol |

Method and Basis:

B97M-D3BJ / def2-TZVPP

xyz, charge: 0, multiplicity: 1

|    |           |           |           |
|----|-----------|-----------|-----------|
| Sn | 0.424245  | 0.435842  | 1.616764  |
| N  | -0.509415 | 0.807483  | 3.435964  |
| C  | -0.635345 | 1.949560  | 4.196907  |
| C  | -1.212032 | 1.628679  | 5.393137  |
| C  | -1.457952 | 0.229352  | 5.383259  |
| C  | -1.010873 | -0.243136 | 4.184281  |
| H  | -0.279289 | 2.889329  | 3.829051  |
| H  | -1.425777 | 2.310474  | 6.192737  |
| H  | -1.907998 | -0.349852 | 6.165052  |
| H  | -1.013536 | -1.240522 | 3.787392  |
| N  | 0.279346  | 2.380097  | 0.896043  |
| C  | 1.080986  | 2.786860  | -0.156271 |
| C  | 0.713807  | 4.041873  | -0.544822 |
| C  | -0.371339 | 4.430240  | 0.285804  |
| C  | -0.611892 | 3.399915  | 1.150262  |
| H  | 1.855478  | 2.143995  | -0.529454 |
| H  | 1.162501  | 4.620059  | -1.328141 |
| H  | -0.913892 | 5.354045  | 0.239879  |
| H  | -1.357051 | 3.293279  | 1.910936  |

### sn2\_py3\_B97M\_D3\_TZVPP\_optfreq

|                            |                        |
|----------------------------|------------------------|
| Total correction:          | 606.1873 kJ/mol        |
| Single point energy:       | -2215822.5461 kJ/mol   |
| Total enthalpy:            | -2215213.8797 kJ/mol   |
| Final entropy term:        | 156.8635 kJ/mol        |
| Total gibbs free enthalpy: | -2215370.7432 kJ/mol   |
| Method and Basis:          | B97M-D3BJ / def2-TZVPP |

xyz, charge: -1, multiplicity: 1

|    |           |           |           |
|----|-----------|-----------|-----------|
| Sn | -0.512397 | 0.317129  | 0.827212  |
| N  | 1.617228  | 0.011173  | 0.780088  |
| C  | 2.312285  | -0.309422 | -0.352065 |
| C  | 3.660348  | -0.327656 | -0.077265 |
| C  | 3.794362  | -0.004225 | 1.293896  |
| C  | 2.523679  | 0.197067  | 1.784238  |
| H  | 4.449454  | -0.547060 | -0.772377 |
| H  | 4.708294  | 0.069221  | 1.853594  |
| H  | 2.190300  | 0.463221  | 2.767868  |
| N  | -0.445998 | 0.650399  | 2.951733  |
| C  | -0.136636 | 1.799055  | 3.622199  |
| C  | -0.112322 | 1.544544  | 4.975017  |
| C  | -0.420315 | 0.173446  | 5.141854  |

|   |           |           |           |
|---|-----------|-----------|-----------|
| C | -0.619370 | -0.337712 | 3.880052  |
| H | 0.046613  | 2.705773  | 3.080179  |
| H | 0.097628  | 2.258078  | 5.750108  |
| H | -0.489462 | -0.368280 | 6.066924  |
| H | -0.863182 | -1.337444 | 3.571172  |
| N | -0.244228 | 2.420182  | 0.457415  |
| C | 0.918450  | 3.135737  | 0.430421  |
| C | 0.628482  | 4.469561  | 0.250382  |
| C | -0.779901 | 4.576901  | 0.163871  |
| C | -1.276858 | 3.300383  | 0.292951  |
| H | 1.860567  | 2.637202  | 0.546345  |
| H | 1.342378  | 5.269584  | 0.185291  |
| H | -1.354847 | 5.473383  | 0.023149  |
| H | -2.293197 | 2.952029  | 0.289739  |
| H | 1.793998  | -0.490837 | -1.275555 |

### sn2\_py4\_B97M\_D3\_TZVPP\_optfreq

|                            |                        |
|----------------------------|------------------------|
| Total correction:          | 801.6555 kJ/mol        |
| Single point energy:       | -2766550.168 kJ/mol    |
| Total enthalpy:            | -2765746.0335 kJ/mol   |
| Final entropy term:        | 186.8122 kJ/mol        |
| Total gibbs free enthalpy: | -2765932.8457 kJ/mol   |
| Method and Basis:          | B97M-D3BJ / def2-TZVPP |

xyz, charge: -2, multiplicity: 1

|    |           |           |           |
|----|-----------|-----------|-----------|
| Sn | -0.403203 | -0.069244 | 1.036870  |
| N  | 1.760954  | 0.050065  | 0.714290  |
| C  | 2.434020  | 1.106262  | 0.170182  |
| C  | 3.758782  | 0.768320  | -0.010827 |
| C  | 3.900692  | -0.566297 | 0.441490  |
| C  | 2.655023  | -0.970196 | 0.873580  |
| H  | 4.527420  | 1.407833  | -0.409560 |
| H  | 4.800293  | -1.157236 | 0.459225  |
| H  | 2.339253  | -1.903195 | 1.294506  |
| N  | -0.190572 | 0.613543  | 3.097949  |
| C  | 0.959346  | 0.926161  | 3.750008  |
| C  | 0.668529  | 1.307297  | 5.046099  |
| C  | -0.736858 | 1.220118  | 5.186742  |
| C  | -1.219616 | 0.790625  | 3.966229  |
| H  | 1.900297  | 0.852387  | 3.240842  |
| H  | 1.378975  | 1.609283  | 5.795599  |
| H  | -1.319728 | 1.442839  | 6.063469  |
| H  | -2.230371 | 0.598396  | 3.655669  |
| N  | -0.421796 | 2.262370  | 0.628996  |
| C  | -0.095724 | 3.342788  | 1.383363  |



|   |           |           |           |
|---|-----------|-----------|-----------|
| C | -0.211205 | 4.503153  | 0.635917  |
| C | -0.634213 | 4.103960  | -0.654265 |
| C | -0.750869 | 2.725283  | -0.604660 |
| H | 0.201868  | 3.212240  | 2.407018  |
| H | -0.021997 | 5.508206  | 0.975584  |
| H | -0.831699 | 4.739074  | -1.502123 |
| H | -1.041554 | 2.035484  | -1.378858 |
| N | 0.029986  | -2.164093 | 2.052295  |
| C | 0.459719  | -2.531500 | 3.286447  |
| C | 0.599312  | -3.907913 | 3.356515  |
| C | 0.230688  | -4.409524 | 2.085568  |
| C | -0.112020 | -3.303415 | 1.326840  |
| H | 0.641798  | -1.784343 | 4.036182  |
| H | 0.918144  | -4.478847 | 4.213076  |
| H | 0.214035  | -5.439754 | 1.769939  |
| H | -0.441902 | -3.252567 | 0.302958  |
| H | 1.922153  | 2.025139  | -0.033171 |

#### sn2\_se\_cxet\_B97M\_TZVPP\_optfreq

|                            |                        |
|----------------------------|------------------------|
| Total correction:          | 2150.8152 kJ/mol       |
| Single point energy:       | -11125702.2397 kJ/mol  |
| Total enthalpy:            | -11123548.9454 kJ/mol  |
| Final entropy term:        | 291.002 kJ/mol         |
| Total gibbs free enthalpy: | -11123839.9473 kJ/mol  |
| Method and Basis:          | B97M-D3BJ / def2-TZVPP |

xyz, charge: -2, multiplicity: 1

|   |           |           |           |
|---|-----------|-----------|-----------|
| N | -0.125903 | 0.306799  | 0.262673  |
| C | 0.836076  | -0.679961 | 0.257106  |
| C | 0.327174  | -1.795188 | 0.886477  |
| C | -0.981346 | -1.479939 | 1.308298  |
| C | -1.236054 | -0.187296 | 0.908199  |
| H | 0.844054  | -2.720743 | 1.056397  |
| H | -1.629329 | -2.109938 | 1.887314  |
| C | 2.210547  | -0.540612 | -0.338271 |
| C | 3.190352  | -1.347627 | 0.544318  |
| H | 4.171366  | -1.319330 | 0.078786  |
| H | 2.878178  | -2.388339 | 0.505652  |
| C | 3.298341  | -0.906990 | 1.990180  |
| H | 3.626969  | 0.123417  | 2.058745  |
| H | 4.010953  | -1.528790 | 2.531654  |
| H | 2.337208  | -0.985418 | 2.486343  |
| C | 2.205594  | -1.216043 | -1.736928 |
| H | 1.337891  | -0.865594 | -2.281981 |
| H | 2.061188  | -2.284489 | -1.568931 |

|   |           |           |           |
|---|-----------|-----------|-----------|
| C | 3.430088  | -0.972459 | -2.592436 |
| H | 3.508352  | 0.077323  | -2.851233 |
| H | 3.354675  | -1.538258 | -3.519056 |
| H | 4.358233  | -1.260490 | -2.101596 |
| C | 2.697171  | 0.881203  | -0.399991 |
| C | 4.003364  | 1.301165  | -0.259223 |
| C | 4.013402  | 2.703438  | -0.385636 |
| C | 2.712760  | 3.098929  | -0.614065 |
| N | 1.905374  | 1.989090  | -0.621846 |
| H | 4.855610  | 0.675418  | -0.076308 |
| H | 4.869200  | 3.344702  | -0.292843 |
| C | 2.165627  | 4.493587  | -0.571186 |
| C | 1.641679  | 4.700596  | 0.882004  |
| H | 1.002532  | 3.852954  | 1.112352  |
| H | 2.498983  | 4.629380  | 1.552455  |
| C | 0.865876  | 5.978084  | 1.128612  |
| H | 0.566023  | 6.043817  | 2.172754  |
| H | -0.029022 | 6.008327  | 0.517112  |
| H | 1.449775  | 6.865709  | 0.898177  |
| C | 3.292911  | 5.499905  | -0.826856 |
| H | 2.889699  | 6.500488  | -0.698291 |
| H | 4.036000  | 5.371462  | -0.041815 |
| C | 3.965130  | 5.400649  | -2.184265 |
| H | 4.439887  | 4.436132  | -2.314337 |
| H | 4.724757  | 6.173903  | -2.295865 |
| H | 3.245042  | 5.515236  | -2.985041 |
| C | -2.315077 | 0.731544  | 1.386929  |
| C | -1.672314 | 1.689283  | 2.435143  |
| H | -2.476708 | 2.279926  | 2.875130  |
| H | -1.046834 | 2.387025  | 1.885619  |
| C | -3.420868 | -0.072062 | 2.079835  |
| H | -4.104938 | 0.637105  | 2.542617  |
| H | -2.972693 | -0.633056 | 2.895088  |
| C | -4.199548 | -1.021257 | 1.187017  |
| H | -4.719138 | -0.482481 | 0.404487  |
| H | -4.935559 | -1.578408 | 1.766061  |
| H | -3.539985 | -1.731989 | 0.704512  |
| C | -0.836202 | 1.026695  | 3.510576  |
| H | 0.008375  | 0.505087  | 3.074299  |
| H | -1.405687 | 0.302204  | 4.087428  |
| H | -0.453108 | 1.771710  | 4.205307  |
| C | -2.915077 | 1.617606  | 0.337813  |
| N | -2.151125 | 2.301731  | -0.574313 |
| C | -2.963275 | 3.214296  | -1.215426 |
| C | -4.239164 | 3.094657  | -0.705279 |
| C | -4.208190 | 2.091901  | 0.282556  |
| H | -5.097299 | 3.667978  | -0.998994 |

|    |           |          |           |
|----|-----------|----------|-----------|
| H  | -5.030679 | 1.778218 | 0.896806  |
| C  | 1.020089  | 4.760743 | -1.495430 |
| C  | 0.752125  | 5.908265 | -2.207655 |
| C  | -0.596138 | 5.838458 | -2.616047 |
| C  | -1.113443 | 4.658788 | -2.126449 |
| N  | -0.119708 | 3.991722 | -1.443437 |
| H  | 1.421019  | 6.731914 | -2.369539 |
| H  | -1.130163 | 6.583622 | -3.174863 |
| C  | -2.525434 | 4.167139 | -2.293692 |
| C  | -3.459438 | 5.398869 | -2.253855 |
| H  | -4.473402 | 5.065152 | -2.455370 |
| H  | -3.189619 | 6.036962 | -3.091654 |
| C  | -2.660863 | 3.546907 | -3.711638 |
| H  | -2.553975 | 4.366335 | -4.424226 |
| H  | -1.823177 | 2.880135 | -3.874267 |
| C  | -3.935773 | 2.775220 | -3.975168 |
| H  | -4.835159 | 3.359372 | -3.787660 |
| H  | -3.980869 | 1.893507 | -3.346133 |
| H  | -3.963249 | 2.445421 | -5.012015 |
| C  | -3.431671 | 6.209286 | -0.973679 |
| H  | -3.711631 | 5.600215 | -0.122158 |
| H  | -4.122006 | 7.050451 | -1.032805 |
| H  | -2.436917 | 6.601331 | -0.791978 |
| Sn | -0.155365 | 1.829301 | -1.282064 |
| Se | -0.257363 | 0.833204 | -3.452635 |

### sn2\_se\_cxh\_B97M\_TZVPP\_optfreq

|                            |                        |
|----------------------------|------------------------|
| Total correction:          | 892.4403 kJ/mol        |
| Single point energy:       | -9472035.7851 kJ/mol   |
| Total enthalpy:            | -9471140.8659 kJ/mol   |
| Final entropy term:        | 180.7943 kJ/mol        |
| Total gibbs free enthalpy: | -9471321.6601 kJ/mol   |
| Method and Basis:          | B97M-D3BJ / def2-TZVPP |

xyz, charge: -2, multiplicity: 1

|   |           |           |           |
|---|-----------|-----------|-----------|
| N | -0.251770 | 0.338792  | 0.223980  |
| C | 0.703399  | -0.642017 | 0.265509  |
| C | 0.293814  | -1.630907 | 1.130210  |
| C | -0.973680 | -1.235604 | 1.633497  |
| C | -1.276602 | -0.021922 | 1.054909  |
| H | 0.839159  | -2.529343 | 1.361665  |
| H | -1.579387 | -1.752429 | 2.358209  |
| C | 1.923452  | -0.534055 | -0.583397 |
| C | 2.600006  | 0.790481  | -0.488086 |
| C | 3.925715  | 1.112341  | -0.308386 |

|    |           |           |           |
|----|-----------|-----------|-----------|
| C  | 4.011623  | 2.529059  | -0.343575 |
| C  | 2.733503  | 3.005895  | -0.540524 |
| N  | 1.874960  | 1.944458  | -0.625186 |
| H  | 4.730996  | 0.410478  | -0.177806 |
| H  | 4.891697  | 3.134028  | -0.206748 |
| C  | 2.251370  | 4.410942  | -0.457460 |
| C  | -2.389693 | 0.906378  | 1.390530  |
| C  | -2.930038 | 1.771179  | 0.307313  |
| N  | -2.121128 | 2.364965  | -0.622219 |
| C  | -2.875822 | 3.243874  | -1.353005 |
| C  | -4.170352 | 3.218674  | -0.887195 |
| C  | -4.205625 | 2.275773  | 0.173694  |
| H  | -4.988648 | 3.801700  | -1.272697 |
| H  | -5.048716 | 2.018862  | 0.792096  |
| C  | 1.080800  | 4.799733  | -1.289297 |
| C  | 0.780977  | 6.037829  | -1.815488 |
| C  | -0.537522 | 5.959459  | -2.336509 |
| C  | -0.979202 | 4.676539  | -2.107559 |
| N  | 0.005489  | 3.973141  | -1.465860 |
| H  | 1.424113  | 6.900971  | -1.791813 |
| H  | -1.095436 | 6.738536  | -2.826352 |
| C  | -2.258926 | 4.006882  | -2.474756 |
| Sn | -0.157518 | 1.831923  | -1.323413 |
| Se | -0.264344 | 0.835084  | -3.492476 |
| H  | 3.079926  | 5.077150  | -0.691929 |
| H  | 1.646945  | -0.717177 | -1.627494 |
| H  | 2.625751  | -1.313299 | -0.297625 |
| H  | -3.208341 | 0.327176  | 1.814362  |
| H  | -2.050665 | 1.560206  | 2.207493  |
| H  | -2.074147 | 3.322636  | -3.310092 |
| H  | -2.964646 | 4.755919  | -2.825494 |
| H  | 2.004839  | 4.622235  | 0.593455  |

#### sn\_dodecaborate\_B97M\_D3\_TZVPP\_optfreq

|                            |                        |
|----------------------------|------------------------|
| Total correction:          | 423.165 kJ/mol         |
| Single point energy:       | -1300280.5692 kJ/mol   |
| Total enthalpy:            | -1299854.9251 kJ/mol   |
| Final entropy term:        | 112.0966 kJ/mol        |
| Total gibbs free enthalpy: | -1299967.0217 kJ/mol   |
| Method and Basis:          | B97M-D3BJ / def2-TZVPP |

xyz, charge: -2, multiplicity: 1

|   |           |           |           |
|---|-----------|-----------|-----------|
| B | 0.917182  | 1.081397  | -0.867889 |
| B | -0.566166 | 0.409403  | -1.527349 |
| B | 0.857031  | -0.617081 | -1.313820 |

|    |           |           |           |
|----|-----------|-----------|-----------|
| B  | 1.666439  | -0.205375 | 0.189691  |
| Sn | 1.030560  | 1.706066  | 1.386465  |
| B  | -0.713478 | 1.511461  | -0.167240 |
| B  | -0.749726 | -1.244866 | -0.940020 |
| B  | 0.606151  | -1.603808 | 0.131083  |
| B  | 0.497740  | -0.569975 | 1.548570  |
| B  | -0.971501 | 0.490528  | 1.328454  |
| B  | -1.695175 | 0.056565  | -0.214038 |
| B  | -0.971557 | -1.188616 | 0.809295  |
| H  | 1.561802  | 1.831817  | -1.553949 |
| H  | -0.952664 | 0.726464  | -2.619566 |
| H  | 1.480457  | -1.028308 | -2.254593 |
| H  | 2.853264  | -0.388858 | 0.273544  |
| H  | -1.252944 | 2.573184  | -0.342616 |
| H  | -1.263743 | -2.097058 | -1.611557 |
| H  | 1.052882  | -2.715817 | 0.216447  |
| H  | 0.839785  | -1.022678 | 2.610134  |
| H  | -1.705881 | 0.811806  | 2.226682  |
| H  | -2.884003 | 0.124447  | -0.373467 |
| H  | -1.645996 | -2.005596 | 1.375594  |

#### sn\_me4\_PBEh3c\_optfreq

|                            |                     |
|----------------------------|---------------------|
| Total correction:          | 418.198 kJ/mol      |
| Single point energy:       | -980942.3411 kJ/mol |
| Total enthalpy:            | -980521.6641 kJ/mol |
| Final entropy term:        | 125.3206 kJ/mol     |
| Total gibbs free enthalpy: | -980646.9847 kJ/mol |
| Method and Basis:          | PBEh-3c / def2-mSVP |

xyz, charge: 0, multiplicity: 1

|    |           |           |           |
|----|-----------|-----------|-----------|
| Sn | 0.000012  | -0.000000 | 0.999958  |
| C  | -1.018761 | -1.764587 | 1.720326  |
| H  | -0.523849 | -2.669890 | 1.370424  |
| H  | -2.050208 | -1.788687 | 1.370360  |
| H  | -1.032696 | -1.788648 | 2.809440  |
| C  | 2.037553  | -0.000004 | 1.720379  |
| H  | 2.574141  | 0.881232  | 1.370467  |
| H  | 2.574141  | -0.881235 | 1.370457  |
| H  | 2.065323  | -0.000010 | 2.809492  |
| C  | -1.018761 | 1.764579  | 1.720346  |
| H  | -0.523850 | 2.669886  | 1.370453  |
| H  | -1.032696 | 1.788628  | 2.809460  |
| H  | -2.050209 | 1.788683  | 1.370380  |
| C  | -0.000023 | 0.000012  | -1.161196 |
| H  | 0.508741  | -0.881220 | -1.550463 |

H 0.508741 0.881249 -1.550454  
H -1.017596 0.000014 -1.550410

### sn\_dithiolate\_B97M\_D3\_TZVPP\_optfreq

Total correction: 468.1406 kJ/mol  
Single point energy: -5959619.6617 kJ/mol  
Total enthalpy: -5959149.0422 kJ/mol  
Final entropy term: 168.4528 kJ/mol  
Total gibbs free enthalpy: -5959317.495 kJ/mol  
Method and Basis: B97M-D3BJ / def2-TZVPP

xyz, charge: -2, multiplicity: 1

Sn 5.190364 -0.265657 4.791056  
S 6.712104 0.768042 6.787963  
S 7.191583 1.000637 3.921334  
S 3.790052 0.251249 2.528635  
S 3.381020 1.460964 5.148614  
C 7.835667 1.059616 5.531643  
C 9.190406 1.321073 5.756760  
C 9.840576 1.423202 7.028232  
H 9.339103 1.310469 7.971261  
C 11.174433 1.678814 6.813467  
H 11.927972 1.805753 7.574592  
C 11.398492 1.746828 5.400370  
H 12.348071 1.931415 4.923649  
C 10.199480 1.532223 4.762289  
H 10.020056 1.509745 3.703514  
C 2.731912 1.081906 3.585206  
C 1.424769 1.437410 3.239724  
C 0.784488 1.211951 1.979220  
H 1.257316 0.735599 1.140735  
C -0.498113 1.702282 2.051042  
H -1.232108 1.680391 1.261102  
C -0.698486 2.250270 3.359136  
H -1.608652 2.705497 3.716041  
C 0.463924 2.091391 4.076591  
H 0.647446 2.386164 5.093062

### phi\_B97M\_D3\_TZVPP\_opt\_freq

Total correction: 254.7123 kJ/mol  
Single point energy: -1390798.861 kJ/mol  
Total enthalpy: -1390541.6697 kJ/mol  
Final entropy term: 100.8168 kJ/mol

Total gibbs free enthalpy: -1390642.4865 kJ/mol

Method and Basis: B97M-D3BJ / def2-TZVPP

xyz, charge: 0, multiplicity: 1

|   |           |           |           |
|---|-----------|-----------|-----------|
| H | -0.000001 | -0.005664 | -0.005601 |
| C | 0.000003  | -0.001131 | 1.069467  |
| C | 0.000002  | -0.003106 | 3.842451  |
| C | 0.000005  | -1.193260 | 1.772803  |
| C | 0.000002  | 1.194219  | 1.768733  |
| C | 0.000001  | 1.197165  | 3.152968  |
| C | 0.000004  | -1.206350 | 3.156892  |
| H | -0.000003 | 2.123510  | 1.224718  |
| H | -0.000004 | 2.129041  | 3.691223  |
| H | 0.000000  | -2.139652 | 3.690524  |
| H | -0.000003 | -0.009485 | 4.919231  |
| I | -0.000007 | -3.000151 | 0.729836  |

#### phi\_sn2\_cxet\_B97M\_D3\_TZVPP\_TightOpt\_opt\_freq

Total correction: 2400.345 kJ/mol

Single point energy: -6211860.6354 kJ/mol

Total enthalpy: -6209457.8114 kJ/mol

Final entropy term: 328.8666 kJ/mol

Total gibbs free enthalpy: -6209786.678 kJ/mol

Method and Basis: B97M-D3BJ / def2-TZVPP

xyz, charge: -2, multiplicity: 1

|   |           |           |           |
|---|-----------|-----------|-----------|
| N | -0.007564 | 0.522737  | 0.198932  |
| C | 1.014985  | -0.396697 | 0.173938  |
| C | 0.584847  | -1.562443 | 0.776036  |
| C | -0.743097 | -1.345131 | 1.198593  |
| C | -1.081401 | -0.059369 | 0.826742  |
| H | 1.158839  | -2.458988 | 0.918237  |
| H | -1.349370 | -2.030975 | 1.759865  |
| C | 2.338646  | -0.160722 | -0.502889 |
| C | 3.399771  | -1.066145 | 0.151761  |
| H | 4.329378  | -0.952066 | -0.399698 |
| H | 3.088939  | -2.096917 | -0.004592 |
| C | 3.654558  | -0.834726 | 1.628275  |
| H | 3.984272  | 0.180971  | 1.810742  |
| H | 4.422313  | -1.514391 | 1.997335  |
| H | 2.751267  | -0.998836 | 2.204230  |
| C | 2.192612  | -0.630972 | -1.974956 |
| H | 1.261161  | -0.241440 | -2.361310 |
| H | 2.070213  | -1.714312 | -1.955941 |
| C | 3.307325  | -0.235769 | -2.918583 |

|   |           |           |           |
|---|-----------|-----------|-----------|
| H | 3.376398  | 0.843038  | -3.000998 |
| H | 3.118312  | -0.637586 | -3.911837 |
| H | 4.278211  | -0.598527 | -2.588739 |
| C | 2.804991  | 1.267779  | -0.426193 |
| C | 4.105893  | 1.713252  | -0.298073 |
| C | 4.063764  | 3.122102  | -0.275406 |
| C | 2.738477  | 3.489235  | -0.407249 |
| N | 1.969703  | 2.357969  | -0.499971 |
| H | 4.985849  | 1.103738  | -0.213748 |
| H | 4.902130  | 3.779596  | -0.141436 |
| C | 2.130897  | 4.840011  | -0.159807 |
| C | 1.618084  | 4.800732  | 1.311510  |
| H | 1.023591  | 3.897802  | 1.412001  |
| H | 2.487207  | 4.670904  | 1.957905  |
| C | 0.786506  | 5.986503  | 1.755291  |
| H | 0.507135  | 5.881266  | 2.802001  |
| H | -0.121867 | 6.060425  | 1.168034  |
| H | 1.319917  | 6.928330  | 1.650903  |
| C | 3.211517  | 5.920667  | -0.267869 |
| H | 2.776921  | 6.870620  | 0.030863  |
| H | 3.978679  | 5.694711  | 0.470425  |
| C | 3.851536  | 6.072129  | -1.636073 |
| H | 4.326682  | 5.149758  | -1.947334 |
| H | 4.606419  | 6.857994  | -1.625344 |
| H | 3.111512  | 6.324546  | -2.385826 |
| C | -2.230382 | 0.764935  | 1.323984  |
| C | -1.676194 | 1.695109  | 2.444901  |
| H | -2.527014 | 2.208000  | 2.895517  |
| H | -1.082710 | 2.459367  | 1.952419  |
| C | -3.303846 | -0.143500 | 1.932101  |
| H | -4.051404 | 0.495034  | 2.399161  |
| H | -2.852111 | -0.716316 | 2.737209  |
| C | -3.980736 | -1.093856 | 0.960960  |
| H | -4.480662 | -0.549537 | 0.169050  |
| H | -4.720805 | -1.708740 | 1.472533  |
| H | -3.257722 | -1.752363 | 0.494973  |
| C | -0.827142 | 1.022883  | 3.504030  |
| H | 0.061968  | 0.585812  | 3.063620  |
| H | -1.361001 | 0.227522  | 4.018784  |
| H | -0.514394 | 1.747437  | 4.253646  |
| C | -2.857398 | 1.683590  | 0.315197  |
| N | -2.103073 | 2.506536  | -0.480396 |
| C | -2.946529 | 3.418134  | -1.071293 |
| C | -4.238255 | 3.162510  | -0.655229 |
| C | -4.181477 | 2.069124  | 0.232583  |
| H | -5.121169 | 3.703283  | -0.939698 |
| H | -5.008811 | 1.644826  | 0.769764  |



|    |           |           |            |
|----|-----------|-----------|------------|
| C  | 0.960037  | 5.194248  | -1.025993  |
| C  | 0.618711  | 6.439113  | -1.515538  |
| C  | -0.722852 | 6.361791  | -1.944262  |
| C  | -1.157374 | 5.076590  | -1.687579  |
| N  | -0.124748 | 4.358774  | -1.130919  |
| H  | 1.233067  | 7.319751  | -1.512879  |
| H  | -1.302188 | 7.160604  | -2.368180  |
| C  | -2.497670 | 4.484964  | -2.032620  |
| C  | -3.548437 | 5.611830  | -2.051024  |
| H  | -4.491620 | 5.189838  | -2.388379  |
| H  | -3.250664 | 6.320887  | -2.820448  |
| C  | -2.402305 | 3.936950  | -3.482104  |
| H  | -2.303608 | 4.796749  | -4.145491  |
| H  | -1.473815 | 3.391137  | -3.575883  |
| C  | -3.534734 | 3.040882  | -3.933605  |
| H  | -4.504624 | 3.526447  | -3.853602  |
| H  | -3.574447 | 2.139871  | -3.331974  |
| H  | -3.390205 | 2.746339  | -4.970944  |
| C  | -3.761289 | 6.347657  | -0.742632  |
| H  | -4.080930 | 5.667750  | 0.037774   |
| H  | -4.521727 | 7.120125  | -0.855104  |
| H  | -2.843252 | 6.821093  | -0.414558  |
| Sn | -0.081312 | 2.143830  | -1.321338  |
| I  | -0.135856 | 1.074528  | -4.381717  |
| C  | -0.164523 | 0.342539  | -6.450274  |
| C  | -0.195893 | -0.588703 | -9.080630  |
| C  | 0.997275  | -0.125283 | -7.046350  |
| C  | -1.342338 | 0.339280  | -7.182769  |
| C  | -1.360125 | -0.123752 | -8.489277  |
| C  | 0.984048  | -0.587086 | -8.353251  |
| H  | 1.917209  | -0.126971 | -6.482390  |
| H  | -2.250428 | 0.701355  | -6.726055  |
| H  | -2.284091 | -0.121093 | -9.048559  |
| H  | 1.896064  | -0.947577 | -8.805741  |
| H  | -0.207952 | -0.948517 | -10.097335 |

## 14 Literature

- [1] D. Jacoby, C. Floriani, A. Chiesi-Villa, C. Rizzoli, *Journal of the American Chemical Society* **1993**, *115*, 3595-3602.
- [2] D. Geiß, M. I. Arz, M. Straßmann, G. Schnakenburg, A. C. Filippou, *Angewandte Chemie International Edition* **2015**, *54*, 2739-2744.
- [3] G. Sheldrick, *Acta Crystallogr. A* **2015**, *71*, 3-8.
- [4] G. Sheldrick, *Acta Crystallographica Section C* **2015**, *71*, 3-8.
- [5] C. B. Hubschle, G. M. Sheldrick, B. Dittrich, *Journal of Applied Crystallography* **2011**, *44*, 1281-1284.
- [6] G. Sheldrick, *Acta Crystallographica Section A* **2008**, *64*, 112-122.
- [7] aF. Neese, *WIREs Computational Molecular Science* **2012**, *2*, 73-78; bF. Neese, *WIREs Computational Molecular Science* **2018**, *8*, e1327.
- [8] aT. Z. E.J. Baerends, A.J. Atkins, J. Autschbach, O. Baseggio, D. Bashford, A. Bérces, F.M. Bickelhaupt, C. Bo, P.M. Boerrigter, L. Cavallo, C. Daul, D.P. Chong, D.V. Chulhai, L. Deng, R.M. Dickson, J.M. Dieterich, D.E. Ellis, M. van Faassen, L. Fan, T.H. Fischer, A. Förster, C. Fonseca Guerra, M. Franchini, A. Ghysels, A. Giammona, S.J.A. van Gisbergen, A. Goez, A.W. Götz, J.A. Groeneveld, O.V. Gritsenko, M. Grüning, S. Gusarov, F.E. Harris, P. van den Hoek, Z. Hu, C.R. Jacob, H. Jacobsen, L. Jensen, L. Joubert, J.W. Kaminski, G. van Kessel, C. König, F. Kootstra, A. Kovalenko, M.V. Krykunov, E. van Lenthe, D.A. McCormack, A. Michalak, M. Mitoraj, S.M. Morton, J. Neugebauer, V.P. Nicu, L. Noodleman, V.P. Osinga, S. Patchkovskii, M. Pavanello, C.A. Peeples, P.H.T. Philipsen, D. Post, C.C. Pye, H. Ramanantoanina, P. Ramos, W. Ravenek, M. Reimann, J.I. Rodríguez, P. Ros, R. Rüger, P.R.T. Schipper, D. Schlüns, H. van Schoot, G. Schreckenbach, J.S. Seldenthuis, M. Seth, J.G. Snijders, M. Solà, M. Stener, M. Swart, D. Swerhone, V. Tognetti, G. te Velde, P. Vernooijs, L. Versluis, L. Visscher, O. Visser, F. Wang, T.A. Wesolowski, E.M. van Wezenbeek, G. Wiesenekker, S.K. Wolff, T.K. Woo, A.L. Yakovlev, *Vol. 2020, Theoretical Chemistry, Vrije Universiteit, Amsterdam, The Netherlands*, **2019**; bG. te Velde, F. M. Bickelhaupt, E. J. Baerends, C. Fonseca Guerra, S. J. A. van Gisbergen, J. G. Snijders, T. Ziegler, *Journal of Computational Chemistry* **2001**, *22*, 931-967.
- [9] A. Najibi, L. Goerigk, *Journal of Chemical Theory and Computation* **2018**, *14*, 5725-5738.
- [10] F. Weigend, R. Ahlrichs, *Physical Chemistry Chemical Physics* **2005**, *7*, 3297-3305.
- [11] V. Barone, M. Cossi, *The Journal of Physical Chemistry A* **1998**, *102*, 1995-2001.
- [12] C. Adamo, V. Barone, *Journal of Chemical Physics* **1999**, *110*, 6158--6170.
- [13] E. Glendening, J. Badenhoop, A. Reed, J. Carpenter, J. Bohmann, C. Morales, C. Landis, F. Weinhold, in *Google Scholar There is no corresponding record for this reference*, Theoretical Chemistry Institute,

University of Wisconsin: Madison, WI, **2013**.

- [14] F. M. Bickelhaupt, E. J. Baerends, in *Reviews in Computational Chemistry*, **2000**, pp. 1-86.
- [15] M. P. Mitoraj, A. Michalak, T. Ziegler, *Journal of Chemical Theory and Computation* **2009**, *5*, 962-975.
- [16] aJ. P. Perdew, *Physical Review B* **1986**, *33*, 8822-8824; bA. D. Becke, *Physical Review A* **1988**, *38*, 3098-3100; cS. Grimme, J. Antony, S. Ehrlich, H. Krieg, *The Journal of Chemical Physics* **2010**, *132*, 154104.
- [17] S. K. Wolff, T. Ziegler, E. v. Lenthe, E. J. Baerends, *The Journal of Chemical Physics* **1999**, *110*, 7689-7698.
- [18] K. Anjali, M. Ahmed, J. Christopher, A. Sakthivel, *Dalton Transactions* **2018**, *47*, 12353-12361.
- [19] R. F. Culmo, C. Shelton, *Application note. Waltham, MA: Perkin Elmer* **2013**.
- [20] M. A. Wünsche, P. Mehlmann, T. Witteler, F. Buß, P. Rathmann, F. Dielmann, *Angewandte Chemie International Edition* **2015**, *54*, 11857-11860.
- [21] U. S. D. Paul, U. Radius, *European Journal of Inorganic Chemistry* **2017**, *2017*, 3362-3375.
- [22] R. A. Kelly Iii, H. Clavier, S. Giudice, N. M. Scott, E. D. Stevens, J. Bordner, I. Samardjiev, C. D. Hoff, L. Cavallo, S. P. Nolan, *Organometallics* **2008**, *27*, 202-210.
- [23] M. L. Kelty, A. J. McNeece, A. S. Filatov, J. Anderson, *ChemRxiv* **2021**.
